# Supplementary material for: Biogenic, urban, and wildfire influences on the molecular compositionof dissolved organic compounds in cloud water
Source: Copernicus journal article supplement (doi:10.5194/acp-2017-628), 2017-08-22
Supplement: Supplementary file 1 [file acp-2017-628-supplement.zip]

## Sheet: Sheet1
m/z	Log10(peak intensity)A1	Log10(peak intensity)A2	Log10(peak intensity)A3	Log10(peak intensity)B1	Log10(peak intensity)B2	Log10(peak intensity)C1	Log10(peak intensity)C2	Log10(peak intensity)C3	C	H	O	N	S	error	mf	ct
141.031	6.74	0	0	0	0	0	0	0	5	6	3	2	0	0.45	C5H6N2O3	CHNO
141.056	0	0	0	6.74	0	0	0	0	7	10	3	0	0	0.05	C7H10O3	CHO
141.092	0	0	0	0	0	0	0	6.58	8	14	2	0	0	-0.01	C8H14O2	CHO
143.108	0	0	0	6.89	0	0	0	0	8	16	2	0	0	0.06	C8H16O2	CHO
155.046	6.62	0	0	0	0	0	0	0	6	8	3	2	0	0.34	C6H8N2O3	CHNO
157.026	6.66	0	0	0	0	0	0	0	5	6	4	2	0	0.32	C5H6N2O4	CHNO
159.066	0	0	0	6.83	0	0	0	6.61	7	12	4	0	0	0.06	C7H12O4	CHO
165.092	0	0	0	6.63	0	0	0	0	10	14	2	0	0	0.15	C10H14O2	CHO
167.071	0	0	0	6.88	0	0	0	0	9	12	3	0	0	0.18	C9H12O3	CHO
167.108	0	0	0	6.67	0	0	0	0	10	16	2	0	0	0.14	C10H16O2	CHO
169.051	0	0	0	6.99	0	0	0	6.78	8	10	4	0	0	-0.01	C8H10O4	CHO
171.041	6.71	0	0	0	0	0	0	0	6	8	4	2	0	0.22	C6H8N2O4	CHNO
171.139	0	0	0	6.65	0	0	0	0	10	20	2	0	0	0.09	C10H20O2	CHO
181.051	0	0	0	6.6	0	0	0	0	9	10	4	0	0	0.21	C9H10O4	CHO
183.041	6.81	0	0	0	0	0	0	0	7	8	4	2	0	0.3	C7H8N2O4	CHNO
185.02	6.62	0	0	0	0	0	0	0	6	6	5	2	0	0.32	C6H6N2O5	CHNO
185.046	0	0	0	7.06	0	7.3	6.96	6.77	8	10	5	0	0	-0.05	C8H10O5	CHO
185.118	0	0	6.71	7.15	6.6	0	0	6.93	10	18	3	0	0	0.14	C10H18O3	CHO
187.036	6.77	0	0	0	0	0	0	0	6	8	5	2	0	0.29	C6H8N2O5	CHNO
187.134	0	0	0	6.69	0	0	0	0	10	20	3	0	0	0.13	C10H20O3	CHO
189.077	0	0	0	7	0	7.58	7.2	6.97	8	14	5	0	0	-0.05	C8H14O5	CHO
189.113	0	0	0	6.63	0	0	0	6.75	9	18	4	0	0	0.12	C9H18O4	CHO
193.087	0	0	0	6.73	0	0	0	0	11	14	3	0	0	0.11	C11H14O3	CHO
195.066	0	0	0	7.22	0	6.93	6.71	6.92	10	12	4	0	0	0	C10H12O4	CHO
195.103	0	6.62	6.67	7.17	6.63	0	0	6.95	11	16	3	0	0	0.13	C11H16O3	CHO
197.02	6.8	0	0	0	0	0	0	0	7	6	5	2	0	0.41	C7H6N2O5	CHNO
197.046	0	0	0	7	0	7	6.72	6.72	9	10	5	0	0	-0.13	C9H10O5	CHO
197.118	0	0	6.79	7.24	6.82	0	0	7.06	11	18	3	0	0	0.17	C11H18O3	CHO
199.134	0	0	0	6.98	0	0	0	6.66	11	20	3	0	0	0.06	C11H20O3	CHO
200.166	0	0	0	6.95	0	0	0	0	11	23	2	1	0	0.08	C11H23NO2	CHNO
201.015	6.74	0	0	0	0	0	0	0	6	6	6	2	0	0.36	C6H6N2O6	CHNO
201.04	0	0	0	6.82	0	7.17	6.84	0	8	10	6	0	0	-0.04	C8H10O6	CHO
201.052	6.73	0	0	0	0	0	0	0	7	10	5	2	0	0.21	C7H10N2O5	CHNO
201.077	0	7.61	7.47	8.16	7.38	8.37	8.2	8.11	9	14	5	0	0	0.04	C9H14O5	CHO
203.031	6.75	0	0	0	0	0	0	0	6	8	6	2	0	0.25	C6H8N2O6	CHNO
203.056	0	0	0	7.05	0	7.9	7.33	0	8	12	6	0	0	-0.07	C8H12O6	CHO
203.092	0	6.89	6.87	7.37	6.69	7.4	7.2	7.35	9	16	5	0	0	0.01	C9H16O5	CHO
203.129	0	0	0	6.63	0	0	0	6.65	10	20	4	0	0	0.04	C10H20O4	CHO
205.087	0	0	0	6.62	0	0	0	0	12	14	3	0	0	0.13	C12H14O3	CHO
207.03	0	0	0	0	0	6.8	6.72	0	10	8	5	0	0	-0.13	C10H8O5	CHO
207.066	0	0	0	6.72	0	0	0	6.64	11	12	4	0	0	0.04	C11H12O4	CHO
207.103	0	0	0	6.85	0	0	0	6.7	12	16	3	0	0	0.08	C12H16O3	CHO
209.046	0	0	0	6.76	0	6.7	0	0	10	10	5	0	0	-0.18	C10H10O5	CHO
209.049	0	0	0	6.67	0	6.74	0	0	7	14	5	0	1	-0.1	C7H14O5S	CHOS
209.082	0	0	0	7.22	0	6.95	6.77	7.01	11	14	4	0	0	-0.06	C11H14O4	CHO
209.118	0	0	6.75	7.23	6.64	0	0	7.01	12	18	3	0	0	0.15	C12H18O3	CHO
209.155	0	0	0	6.63	0	0	0	0	13	22	2	0	0	0.13	C13H22O2	CHO
210.077	0	0	0	6.63	0	0	0	6.73	10	13	4	1	0	0.05	C10H13NO4	CHNO
211.036	6.79	0	0	0	0	0	0	0	8	8	5	2	0	0.32	C8H8N2O5	CHNO
211.061	0	6.72	0	7.44	6.64	7.42	7.22	7.05	10	12	5	0	0	0.02	C10H12O5	CHO
211.098	0	6.96	7.05	7.45	6.96	7.12	7.01	7.42	11	16	4	0	0	0.07	C11H16O4	CHO
211.134	6.63	0	0	7.11	6.73	0	0	6.97	12	20	3	0	0	0.11	C12H20O3	CHO
212.056	6.63	0	0	0	0	6.74	0	6.7	9	11	5	1	0	0.07	C9H11NO5	CHNO
212.093	0	0	0	6.92	0	6.68	0	6.71	10	15	4	1	0	-0.08	C10H15NO4	CHNO
213.015	6.71	0	0	0	0	0	0	0	7	6	6	2	0	0.22	C7H6N2O6	CHNO
213.04	0	0	0	6.92	0	7.24	6.99	6.72	9	10	6	0	0	-0.09	C9H10O6	CHO
213.077	6.82	7.61	7.51	8.14	7.52	8	7.89	7.99	10	14	5	0	0	-0.21	C10H14O5	CHO
213.113	6.85	7.06	7.14	7.59	7.1	7.02	7.05	7.49	11	18	4	0	0	0.07	C11H18O4	CHO
213.15	6.66	0	0	6.97	0	0	0	6.7	12	22	3	0	0	0.08	C12H22O3	CHO
213.186	6.88	6.66	0	6.66	0	0	0	0	13	26	2	0	0	0.14	C13H26O2	CHO
214.109	0	0	0	0	0	0	0	6.68	10	17	4	1	0	0.15	C10H17NO4	CHNO
215.056	0	6.86	6.63	7.61	6.78	8.17	7.77	7.17	9	12	6	0	0	0.1	C9H12O6	CHO
215.067	6.7	0	6.65	6.98	0	0	0	0	8	12	5	2	0	0.26	C8H12N2O5	CHNO
215.093	7.01	7.98	7.94	8.26	7.79	8.13	8.07	8.29	10	16	5	0	0	-0.21	C10H16O5	CHO
215.129	6.76	6.82	6.82	7.23	6.8	6.85	6.91	7.16	11	20	4	0	0	0.05	C11H20O4	CHO
216.088	0	0	0	0	0	6.67	0	0	9	15	5	1	0	-0.2	C9H15NO5	CHNO
217.035	0	0	0	0	0	6.76	6.62	0	8	10	7	0	0	-0.15	C8H10O7	CHO
217.047	6.74	0	0	0	0	0	0	0	7	10	6	2	0	0.18	C7H10N2O6	CHNO
217.072	0	7.05	6.77	7.63	6.64	8.22	8.04	7.38	9	14	6	0	0	0.07	C9H14O6	CHO
219.026	6.66	0	0	0	0	0	0	0	6	8	7	2	0	0.17	C6H8N2O7	CHNO
219.051	0	0	0	0	0	6.68	0	0	8	12	7	0	0	-0.25	C8H12O7	CHO
219.066	0	0	0	6.81	0	0	6.64	6.67	12	12	4	0	0	-0.01	C12H12O4	CHO
219.087	0	0	0	6.95	0	6.97	6.74	6.79	9	16	6	0	0	-0.05	C9H16O6	CHO
219.103	0	0	0	7.11	0	0	0	6.68	13	16	3	0	0	0.04	C13H16O3	CHO
219.124	0	0	0	0	0	0	0	6.66	10	20	5	0	0	-0.02	C10H20O5	CHO
220.046	0	0	0	6.76	0	0	0	0	7	11	7	1	0	0.03	C7H11NO7	CHNO
221.046	0	0	0	6.67	0	6.86	6.76	0	11	10	5	0	0	-0.04	C11H10O5	CHO
221.057	0	0	6.65	0	0	0	0	0	10	10	4	2	0	0.2	C10H10N2O4	CHNO
221.082	6.62	6.66	0	7.27	6.8	6.9	6.81	7.07	12	14	4	0	0	0.02	C12H14O4	CHO
221.118	0	0	0	7.02	0	0	0	6.77	13	18	3	0	0	0.04	C13H18O3	CHO
221.155	0	0	0	6.65	0	0	0	0	14	22	2	0	0	0.09	C14H22O2	CHO
222.077	0	0	0	0	0	6.62	0	6.65	11	13	4	1	0	-0.21	C11H13NO4	CHNO
223.028	0	0	0	7.15	0	7.24	6.72	0	7	12	6	0	1	-0.09	C7H12O6S	CHOS
223.061	0	0	0	7.11	0	7.15	6.95	7.01	11	12	5	0	0	-0.02	C11H12O5	CHO
223.065	0	0	0	6.77	0	6.71	0	0	8	16	5	0	1	-0.2	C8H16O5S	CHOS
223.098	6.67	6.87	6.95	7.47	7	7.02	6.98	7.28	12	16	4	0	0	0.06	C12H16O4	CHO
223.134	0	6.65	6.82	7.2	6.76	0	0	7.04	13	20	3	0	0	0.1	C13H20O3	CHO
224.093	0	6.63	6.68	6.91	0	0	0	6.97	11	15	4	1	0	0.04	C11H15NO4	CHNO
225.015	6.63	0	0	0	0	0	0	0	8	6	6	2	0	0.39	C8H6N2O6	CHNO
225.04	0	0	0	6.73	0	6.99	6.75	0	10	10	6	0	0	-0.07	C10H10O6	CHO
225.044	0	0	0	6.63	0	7.18	6.84	0	7	14	6	0	1	-0.02	C7H14O6S	CHOS
225.052	6.86	0	6.64	0	0	0	0	6.66	9	10	5	2	0	0.12	C9H10N2O5	CHNO
225.077	0	7	6.84	7.61	6.92	7.5	7.4	7.39	11	14	5	0	0	0.05	C11H14O5	CHO
225.113	6.83	7.18	7.32	7.71	7.25	7.15	7.05	7.62	12	18	4	0	0	0.08	C12H18O4	CHO
225.15	6.69	6.69	6.88	7.35	6.87	0	0	6.99	13	22	3	0	0	0.11	C13H22O3	CHO
225.186	6.72	0	0	0	0	0	0	0	14	26	2	0	0	0.36	C14H26O2	CHO
226.036	6.66	0	0	0	0	6.63	0	0	9	9	6	1	0	-0.11	C9H9NO6	CHNO
226.072	0	0	0	6.64	0	7.04	6.71	6.87	10	13	5	1	0	-0.06	C10H13NO5	CHNO
226.109	0	0	6.66	0	0	0	0	6.82	11	17	4	1	0	0.15	C11H17NO4	CHNO
227.056	0	6.95	0	7.61	6.84	7.8	7.59	7.34	10	12	6	0	0	0.12	C10H12O6	CHO
227.067	6.69	0	0	0	0	0	0	0	9	12	5	2	0	0.36	C9H12N2O5	CHNO
227.129	7.06	7.1	7.26	7.72	7.22	7.03	6.95	7.59	12	20	4	0	0	0.03	C12H20O4	CHO
227.165	0	0	0	6.85	0	0	0	0	13	24	3	0	0	0.07	C13H24O3	CHO
228.051	6.76	0	6.72	0	0	6.93	6.64	6.8	9	11	6	1	0	0.06	C9H11NO6	CHNO
228.088	0	6.81	6.71	7.03	6.69	7.08	6.89	7.01	10	15	5	1	0	0.04	C10H15NO5	CHNO
229.01	6.72	0	0	0	0	0	0	0	7	6	7	2	0	0.2	C7H6N2O7	CHNO
229.035	0	0	0	0	0	7.11	6.84	0	9	10	7	0	0	-0.04	C9H10O7	CHO
229.072	6.82	7.6	7.38	8.25	7.44	8.51	8.31	7.99	10	14	6	0	0	-0.21	C10H14O6	CHO
229.108	7.15	7.43	7.56	7.95	7.5	7.68	7.62	7.9	11	18	5	0	0	0.05	C11H18O5	CHO
229.145	6.87	6.8	6.79	7.33	6.9	6.75	6.79	7.22	12	22	4	0	0	0.06	C12H22O4	CHO
229.181	0	0	0	6.65	0	0	0	0	13	26	3	0	0	0.06	C13H26O3	CHO
230.067	0	0	0	0	0	6.84	6.67	0	9	13	6	1	0	-0.13	C9H13NO6	CHNO
231.026	6.85	0	0	0	0	0	0	0	7	8	7	2	0	0.18	C7H8N2O7	CHNO
231.051	0	0	0	6.91	0	7.51	7.17	6.86	9	12	7	0	0	0.08	C9H12O7	CHO
231.124	6.68	6.87	6.92	7.27	6.82	6.97	6.92	7.23	11	20	5	0	0	0.09	C11H20O5	CHO
231.16	0	0	0	0	0	0	0	6.64	12	24	4	0	0	-0.08	C12H24O4	CHO
232.046	0	0	0	6.82	0	0	6.93	0	8	11	7	1	0	0.17	C8H11NO7	CHNO
232.083	0	0	0	6.98	0	6.69	0	6.86	9	15	6	1	0	0.04	C9H15NO6	CHNO
233.042	6.68	0	0	0	0	0	0	0	7	10	7	2	0	0.29	C7H10N2O7	CHNO
233.046	0	0	0	6.67	0	6.7	6.69	0	12	10	5	0	0	-0.1	C12H10O5	CHO
233.049	0	6.67	0	6.89	0	6.84	6.67	6.85	9	14	5	0	1	0.02	C9H14O5S	CHOS
233.067	0	0	0	6.81	0	7.37	7.07	6.67	9	14	7	0	0	-0.02	C9H14O7	CHO
233.082	0	0	0	6.88	0	0	0	6.73	13	14	4	0	0	-0.01	C13H14O4	CHO
233.103	0	6.84	6.89	7.34	0	7.3	7.17	7.13	10	18	6	0	0	0.05	C10H18O6	CHO
233.118	0	0	0	6.85	0	0	0	0	14	18	3	0	0	0.07	C14H18O3	CHO
234.062	0	0	0	6.89	0	6.71	6.7	0	8	13	7	1	0	0.08	C8H13NO7	CHNO
234.077	0	0	0	0	0	0	0	6.66	12	13	4	1	0	-0.06	C12H13NO4	CHNO
235.028	0	0	0	6.96	0	6.68	0	0	8	12	6	0	1	-0.21	C8H12O6S	CHOS
235.061	0	0	0	7.03	0	6.95	6.87	6.83	12	12	5	0	0	0.03	C12H12O5	CHO
235.065	0	6.94	6.65	7.01	0	0	6.64	6.92	9	16	5	0	1	0.12	C9H16O5S	CHOS
235.098	0	6.69	6.63	7.16	6.75	6.75	6.69	6.99	13	16	4	0	0	0.06	C13H16O4	CHO
235.134	0	6.65	6.77	7.24	6.73	0	0	6.93	14	20	3	0	0	0.06	C14H20O3	CHO
235.17	6.68	0	0	6.87	0	0	0	0	15	24	2	0	0	0.06	C15H24O2	CHO
236.093	0	0	0	0	0	6.63	0	6.77	12	15	4	1	0	-0.17	C12H15NO4	CHNO
237.04	0	0	0	0	0	6.76	6.7	0	11	10	6	0	0	-0.13	C11H10O6	CHO
237.044	0	6.79	0	7.51	0	7.61	7.3	6.71	8	14	6	0	1	0.03	C8H14O6S	CHOS
237.052	6.66	0	6.7	0	0	0	0	0	10	10	5	2	0	0.24	C10H10N2O5	CHNO
237.077	0	6.84	6.76	7.42	6.86	7.21	7.13	7.22	12	14	5	0	0	0.04	C12H14O5	CHO
237.113	6.67	7.03	7.07	7.47	7.03	6.94	6.89	7.33	13	18	4	0	0	0.09	C13H18O4	CHO
237.15	6.71	6.79	6.99	7.39	6.97	0	0	7.12	14	22	3	0	0	0.12	C14H22O3	CHO
238.072	0	0	0	6.7	0	6.82	6.73	6.82	11	13	5	1	0	0.07	C11H13NO5	CHNO
238.109	0	6.65	6.63	0	0	0	0	7.01	12	17	4	1	0	0.14	C12H17NO4	CHNO
239.023	0	0	0	6.8	0	6.91	0	0	7	12	7	0	1	0.04	C7H12O7S	CHOS
239.031	6.66	0	0	0	0	0	0	0	9	8	6	2	0	0.15	C9H8N2O6	CHNO
239.056	0	0	0	7.26	0	7.29	7.13	6.98	11	12	6	0	0	0	C11H12O6	CHO
239.06	0	0	0	6.98	6.63	7.22	7.18	0	8	16	6	0	1	0.25	C8H16O6S	CHOS
239.093	6.76	7.32	7.36	7.89	7.31	7.64	7.51	7.79	12	16	5	0	0	0.08	C12H16O5	CHO
239.104	0	0	0	0	0	0	0	6.63	11	16	4	2	0	0.19	C11H16N2O4	CHNO
239.165	0	0	6.7	7.24	6.75	0	0	6.85	14	24	3	0	0	0.06	C14H24O3	CHO
239.202	6.92	6.72	0	0	0	0	0	6.66	15	28	2	0	0	0.05	C15H28O2	CHO
240.051	0	0	0	0	0	6.93	6.67	6.8	10	11	6	1	0	0.01	C10H11NO6	CHNO
240.088	0	0	6.69	7.04	0	7.02	6.73	7.1	11	15	5	1	0	0.09	C11H15NO5	CHNO
240.124	0	0	6.77	0	0	0	0	6.89	12	19	4	1	0	0.18	C12H19NO4	CHNO
241.035	0	0	0	6.65	0	6.97	6.68	0	10	10	7	0	0	-0.04	C10H10O7	CHO
241.039	0	0	0	6.77	0	6.64	0	0	7	14	7	0	1	-0.04	C7H14O7S	CHOS
241.047	6.83	0	6.78	0	0	0	0	0	9	10	6	2	0	0.22	C9H10N2O6	CHNO
241.072	0	6.98	6.89	7.76	7	7.88	7.73	7.54	11	14	6	0	0	0.13	C11H14O6	CHO
241.108	7.28	7.62	7.82	8.12	7.66	7.71	7.65	8.06	12	18	5	0	0	0.16	C12H18O5	CHO
241.145	6.99	7.02	7.23	7.69	7.15	6.77	6.85	7.39	13	22	4	0	0	0.15	C13H22O4	CHO
241.181	6.85	6.78	0	6.89	6.68	0	0	0	14	26	3	0	0	0.14	C14H26O3	CHO
242.067	0	0	6.69	6.81	0	7.19	6.94	6.93	10	13	6	1	0	0.01	C10H13NO6	CHNO
242.103	0	0	0	6.7	0	6.83	6.76	6.93	11	17	5	1	0	0.03	C11H17NO5	CHNO
243.026	6.72	0	0	0	0	0	0	0	8	8	7	2	0	0.32	C8H8N2O7	CHNO
243.051	0	0	0	7.28	0	7.69	7.43	7	10	12	7	0	0	0.08	C10H12O7	CHO
243.062	6.71	0	6.66	0	0	0	0	6.67	9	12	6	2	0	0.26	C9H12N2O6	CHNO
243.087	6.79	7.38	7.35	8.02	7.29	8.15	8.07	7.94	11	16	6	0	0	0.15	C11H16O6	CHO
243.124	7.17	7.36	7.5	7.87	7.42	7.46	7.43	7.82	12	20	5	0	0	0.16	C12H20O5	CHO
243.16	0	0	0	7.2	6.65	0	6.72	7.02	13	24	4	0	0	0.08	C13H24O4	CHO
243.171	0	0	0	6.86	0	0	0	0	12	24	3	2	0	0.11	C12H24N2O3	CHNO
243.197	0	0	0	6.76	0	0	0	0	14	28	3	0	0	0.07	C14H28O3	CHO
244.046	6.67	0	6.67	0	0	6.81	0	6.7	9	11	7	1	0	0.03	C9H11NO7	CHNO
244.083	0	6.87	6.7	7.45	7.06	6.99	6.92	7.25	10	15	6	1	0	0.22	C10H15NO6	CHNO
245.042	6.83	0	0	0	0	0	0	0	8	10	7	2	0	0.31	C8H10N2O7	CHNO
245.067	0	7.03	6.88	7.72	6.92	8.2	7.92	7.42	10	14	7	0	0	0.12	C10H14O7	CHO
245.103	6.78	7.29	7.26	7.78	7.19	7.82	7.68	7.74	11	18	6	0	0	0.06	C11H18O6	CHO
245.139	6.71	6.82	6.86	7.29	6.84	6.94	6.88	7.24	12	22	5	0	0	0.11	C12H22O5	CHO
246.062	0	0	6.77	7.01	0	6.85	6.84	6.9	9	13	7	1	0	0.1	C9H13NO7	CHNO
246.098	0	0	0	7.24	6.66	6.72	6.73	6.98	10	17	6	1	0	0.11	C10H17NO6	CHNO
247.021	6.73	0	0	0	0	0	0	0	7	8	8	2	0	0.11	C7H8N2O8	CHNO
247.046	0	0	0	0	0	6.93	6.65	0	9	12	8	0	0	0.2	C9H12O8	CHO
247.061	0	0	0	6.78	0	6.74	6.7	6.65	13	12	5	0	0	0.02	C13H12O5	CHO
247.065	0	6.81	0	6.81	6.67	0	0	6.73	10	16	5	0	1	0.14	C10H16O5S	CHOS
247.082	0	6.98	6.84	7.53	6.7	7.76	7.6	7.31	10	16	7	0	0	0.17	C10H16O7	CHO
247.098	0	0	0	7	0	0	0	6.88	14	16	4	0	0	0.07	C14H16O4	CHO
247.119	0	0	6.68	7.18	0	7.1	7.07	7.21	11	20	6	0	0	0.04	C11H20O6	CHO
247.134	0	0	0	6.9	0	0	0	0	15	20	3	0	0	0.14	C15H20O3	CHO
247.17	0	0	0	6.63	0	0	0	0	16	24	2	0	0	0.07	C16H24O2	CHO
248.041	0	0	0	6.86	0	6.71	6.76	0	8	11	8	1	0	-0.06	C8H11NO8	CHNO
248.078	0	0	0	7.12	0	6.78	6.96	6.88	9	15	7	1	0	0.11	C9H15NO7	CHNO
249.04	0	0	0	6.67	0	6.78	6.72	6.68	12	10	6	0	0	-0.09	C12H10O6	CHO
249.044	0	0	0	7.09	0	7.11	6.89	6.84	9	14	6	0	1	0.11	C9H14O6S	CHOS
249.077	0	0	0	7.12	6.69	6.81	6.8	6.94	13	14	5	0	0	0.07	C13H14O5	CHO
249.08	6.77	7.14	7.27	7.24	7.12	6.64	6.63	7.3	10	18	5	0	1	0.11	C10H18O5S	CHOS
249.098	0	0	0	6.8	0	6.64	0	0	10	18	7	0	0	-0.13	C10H18O7	CHO
249.113	6.66	6.72	6.85	7.29	6.89	6.66	0	7.06	14	18	4	0	0	0.12	C14H18O4	CHO
249.15	0	0	6.77	7.27	6.81	0	0	6.84	15	22	3	0	0	0.16	C15H22O3	CHO
250.057	0	0	0	6.88	0	0	0	0	8	13	8	1	0	0.22	C8H13NO8	CHNO
250.072	0	0	0	0	0	6.72	0	6.71	12	13	5	1	0	-0.07	C12H13NO5	CHNO
250.109	0	0	0	0	0	0	0	6.83	13	17	4	1	0	0.11	C13H17NO4	CHNO
250.145	7.02	6.92	6.78	7.52	6.86	0	0	6.71	14	21	3	1	0	0.23	C14H21NO3	CHNO
251.023	0	0	0	7.21	0	7.12	6.87	0	8	12	7	0	1	0	C8H12O7S	CHOS
251.056	0	0	0	7.07	0	7.07	6.82	6.95	12	12	6	0	0	0.14	C12H12O6	CHO
251.06	6.69	7.06	0	7.45	6.74	7.66	7.42	7.29	9	16	6	0	1	0.15	C9H16O6S	CHOS
251.093	0	6.89	6.88	7.5	6.93	7.2	7.03	7.28	13	16	5	0	0	0.15	C13H16O5	CHO
251.104	0	0	0	0	0	0	0	6.69	12	16	4	2	0	0.2	C12H16N2O4	CHNO
251.129	6.84	7.11	7.36	7.73	7.18	6.9	6.81	7.5	14	20	4	0	0	0.1	C14H20O4	CHO
251.165	6.92	6.87	7.03	7.72	7.06	0	0	6.9	15	24	3	0	0	0.21	C15H24O3	CHO
252.051	0	0	0	0	0	6.7	0	0	11	11	6	1	0	-0.16	C11H11NO6	CHNO
252.088	0	0	6.66	6.7	0	6.83	0	6.93	12	15	5	1	0	0.17	C12H15NO5	CHNO
252.124	0	0	6.68	0	0	0	0	6.85	13	19	4	1	0	0.18	C13H19NO4	CHNO
253.035	0	0	0	0	0	6.66	0	0	11	10	7	0	0	-0.04	C11H10O7	CHO
253.039	0	0	0	7.22	0	7.48	7.04	0	8	14	7	0	1	0.16	C8H14O7S	CHOS
253.047	6.67	0	0	0	0	0	0	0	10	10	6	2	0	0.25	C10H10N2O6	CHNO
253.072	0	6.76	6.76	7.56	6.89	7.44	7.29	7.29	12	14	6	0	0	0.18	C12H14O6	CHO
253.075	0	0	0	6.99	0	7.14	7.04	6.83	9	18	6	0	1	0.11	C9H18O6S	CHOS
253.083	6.73	0	6.69	0	0	6.69	0	0	11	14	5	2	0	0.13	C11H14N2O5	CHNO
253.108	7.02	7.29	7.43	7.94	7.37	7.45	7.39	7.7	13	18	5	0	0	0.13	C13H18O5	CHO
253.145	7.39	7.43	7.67	8.22	7.66	7.1	7.05	7.84	14	22	4	0	0	0.08	C14H22O4	CHO
253.181	0	0	0	7.06	6.63	0	0	0	15	26	3	0	0	0.13	C15H26O3	CHO
254.067	0	0	0	0	0	6.99	6.75	6.82	11	13	6	1	0	-0.01	C11H13NO6	CHNO
254.103	0	6.69	6.76	6.7	0	6.88	6.79	7.05	12	17	5	1	0	0.16	C12H17NO5	CHNO
254.14	0	0	6.89	0	0	0	0	6.83	13	21	4	1	0	0.1	C13H21NO4	CHNO
255.051	0	0	0	7.09	0	7.34	7.17	6.89	11	12	7	0	0	0	C11H12O7	CHO
255.054	0	0	0	7.41	0	7.28	6.86	0	8	16	7	0	1	0.09	C8H16O7S	CHOS
255.062	6.66	0	6.68	0	0	6.64	0	0	10	12	6	2	0	0.14	C10H12N2O6	CHNO
255.087	6.9	7.36	7.36	8.02	7.41	7.92	7.83	7.84	12	16	6	0	0	0.18	C12H16O6	CHO
255.124	7.36	7.56	7.75	8.3	7.72	7.6	7.51	7.97	13	20	5	0	0	0.18	C13H20O5	CHO
255.16	6.85	6.9	7.17	7.71	7.17	6.66	6.72	0	14	24	4	0	0	0.02	C14H24O4	CHO
255.197	0	6.83	0	0	0	0	0	0	15	28	3	0	0	0.23	C15H28O3	CHO
256.046	0	0	0	0	0	6.73	6.67	6.66	10	11	7	1	0	0.19	C10H11NO7	CHNO
256.083	0	0	0	6.82	0	7.17	7.07	6.99	11	15	6	1	0	0.11	C11H15NO6	CHNO
256.119	0	0	6.66	0	6.64	6.68	0	6.98	12	19	5	1	0	0.17	C12H19NO5	CHNO
257.03	0	0	0	0	0	6.8	0	0	10	10	8	0	0	-0.01	C10H10O8	CHO
257.042	6.86	0	6.7	0	0	0	0	0	9	10	7	2	0	0.14	C9H10N2O7	CHNO
257.067	0	6.85	0	7.65	6.77	8	7.76	7.35	11	14	7	0	0	0.11	C11H14O7	CHO
257.103	7.2	7.64	7.74	8.18	7.58	8.11	8.07	8.21	12	18	6	0	0	0.19	C12H18O6	CHO
257.139	7.17	7.28	7.46	7.86	7.35	7.28	7.29	7.74	13	22	5	0	0	0.13	C13H22O5	CHO
257.176	6.89	6.72	0	7.32	6.74	0	6.68	7.05	14	26	4	0	0	0.19	C14H26O4	CHO
257.212	6.7	0	0	6.69	0	0	0	0	15	30	3	0	0	0.08	C15H30O3	CHO
258.062	0	6.69	6.72	6.88	0	7.03	6.87	6.8	10	13	7	1	0	0.2	C10H13NO7	CHNO
258.098	0	0	6.64	6.83	0	7.12	6.98	6.89	11	17	6	1	0	0.1	C11H17NO6	CHNO
259.021	6.76	0	0	0	0	0	0	0	8	8	8	2	0	0.35	C8H8N2O8	CHNO
259.046	0	0	0	6.67	0	7.37	7	0	10	12	8	0	0	0.16	C10H12O8	CHO
259.057	6.69	6.7	6.65	0	0	0	0	0	9	12	7	2	0	0.22	C9H12N2O7	CHNO
259.082	0	7.15	7.01	7.81	7.06	8.33	8.16	7.59	11	16	7	0	0	0.06	C11H16O7	CHO
259.119	7.01	7.38	7.47	7.89	7.36	7.68	7.63	7.9	12	20	6	0	0	0.18	C12H20O6	CHO
259.155	0	6.74	6.7	7.21	6.82	6.71	0	7.15	13	24	5	0	0	0.02	C13H24O5	CHO
259.192	0	0	0	6.64	0	0	0	0	14	28	4	0	0	0.14	C14H28O4	CHO
260.041	0	0	6.69	0	0	0	0	0	9	11	8	1	0	0.19	C9H11NO8	CHNO
260.078	6.65	6.93	6.66	7.38	6.98	7.02	6.95	7.1	10	15	7	1	0	0.12	C10H15NO7	CHNO
260.114	0	0	0	6.92	6.67	0	0	6.73	11	19	6	1	0	0.23	C11H19NO6	CHNO
261.037	6.83	0	0	0	0	0	0	0	8	10	8	2	0	0.28	C8H10N2O8	CHNO
261.044	0	0	0	6.79	0	0	0	0	10	14	6	0	1	0.12	C10H14O6S	CHOS
261.062	0	0	0	6.94	0	7.53	7.28	6.87	10	14	8	0	0	0.19	C10H14O8	CHO
261.077	0	0	0	6.89	0	6.73	6.7	6.84	14	14	5	0	0	0.17	C14H14O5	CHO
261.098	0	6.88	6.79	7.5	6.71	7.66	7.56	7.42	11	18	7	0	0	0.12	C11H18O7	CHO
261.113	0	0	0	6.98	0	0	0	6.88	15	18	4	0	0	0.19	C15H18O4	CHO
261.134	6.64	6.83	6.88	7.36	6.95	7.07	7.07	7.17	12	22	6	0	0	0.22	C12H22O6	CHO
262.057	0	6.69	0	7.06	0	6.82	6.83	6.71	9	13	8	1	0	0.11	C9H13NO8	CHNO
262.093	0	6.8	0	7.4	6.89	6.86	6.72	7.05	10	17	7	1	0	0.19	C10H17NO7	CHNO
262.108	0	0	0	0	0	0	0	6.7	14	17	4	1	0	-0.02	C14H17NO4	CHNO
263.01	0	0	0	7.1	0	0	0	0	14	4	4	2	0	0.18	C14H4N2O4	CHNO
263.023	0	0	0	6.68	0	0	0	0	9	12	7	0	1	0.22	C9H12O7S	CHOS
263.056	0	0	0	6.92	0	6.74	6.77	6.82	13	12	6	0	0	0.27	C13H12O6	CHO
263.06	6.83	7.23	7.01	7.59	7.05	7.34	7.23	7.4	10	16	6	0	1	0.08	C10H16O6S	CHOS
263.077	0	0	0	6.84	0	7.09	6.86	6.73	10	16	8	0	0	0.14	C10H16O8	CHO
263.093	0	6.76	0	7.3	6.73	6.96	6.73	7.07	14	16	5	0	0	0.1	C14H16O5	CHO
263.114	0	0	0	6.89	0	6.78	6.64	6.77	11	20	7	0	0	0.1	C11H20O7	CHO
263.129	6.75	6.83	6.9	7.36	6.92	6.72	6.67	7.16	15	20	4	0	0	0.19	C15H20O4	CHO
263.165	0	0	0	6.76	0	0	0	0	16	24	3	0	0	0.08	C16H24O3	CHO
264.072	0	0	0	7.06	0	6.72	6.77	6.66	9	15	8	1	0	0.03	C9H15NO8	CHNO
264.088	0	0	0	0	0	6.81	6.73	6.83	13	15	5	1	0	0.16	C13H15NO5	CHNO
264.109	0	0	0	7.09	0	0	0	0	10	19	7	1	0	0.14	C10H19NO7	CHNO
264.124	0	0	0	0	0	0	0	6.82	14	19	4	1	0	0.13	C14H19NO4	CHNO
265.039	0	0	0	7.59	6.66	7.54	7.27	6.85	9	14	7	0	1	0.17	C9H14O7S	CHOS
265.072	0	0	0	7.26	6.76	7.18	7.06	7.1	13	14	6	0	0	0.06	C13H14O6	CHO
265.075	6.97	7.14	7	7.45	6.93	7.51	7.38	7.44	10	18	6	0	1	0.2	C10H18O6S	CHOS
265.083	0	0	0	0	0	0	0	6.77	12	14	5	2	0	0.18	C12H14N2O5	CHNO
265.108	6.73	7.16	7.13	7.61	7.1	7.11	7.07	7.43	14	18	5	0	0	0.16	C14H18O5	CHO
265.119	0	0	0	0	0	0	0	6.7	13	18	4	2	0	0.02	C13H18N2O4	CHNO
265.145	6.86	7.14	7.37	7.67	7.27	6.71	6.81	7.45	15	22	4	0	0	0.06	C15H22O4	CHO
265.181	0	0	0	6.84	0	0	0	0	16	26	3	0	0	0.13	C16H26O3	CHO
266.067	0	0	0	0	0	6.84	6.76	6.73	12	13	6	1	0	0.28	C12H13NO6	CHNO
266.103	0	0	0	6.76	6.73	6.91	6.77	7.03	13	17	5	1	0	0	C13H17NO5	CHNO
267.018	0	0	0	6.9	0	7.16	6.81	0	8	12	8	0	1	-0.07	C8H12O8S	CHOS
267.051	0	0	0	6.74	0	0	6.89	6.8	12	12	7	0	0	0.13	C12H12O7	CHO
267.055	0	6.9	0	7.7	0	8.07	7.8	6.83	9	16	7	0	1	0.16	C9H16O7S	CHOS
267.062	0	6.7	6.78	0	0	0	0	6.78	11	12	6	2	0	0.16	C11H12N2O6	CHNO
267.087	6.64	7.07	7.03	7.71	7.13	7.5	7.41	7.47	13	16	6	0	0	0.15	C13H16O6	CHO
267.091	0	0	0	6.92	0	7.1	7.07	0	10	20	6	0	1	0.04	C10H20O6S	CHOS
267.099	0	0	0	0	0	6.65	0	6.79	12	16	5	2	0	-0.07	C12H16N2O5	CHNO
267.124	7.05	7.51	7.68	8	7.58	7.44	7.34	7.88	14	20	5	0	0	0.06	C14H20O5	CHO
267.16	7.12	7.23	7.56	7.95	7.43	6.78	6.87	7.59	15	24	4	0	0	0.19	C15H24O4	CHO
267.197	6.88	6.78	0	6.91	6.66	0	0	0	16	28	3	0	0	0.17	C16H28O3	CHO
268.046	0	0	0	0	0	6.74	0	0	11	11	7	1	0	-0.05	C11H11NO7	CHNO
268.083	0	6.68	0	6.8	0	7.11	6.95	7	12	15	6	1	0	0.08	C12H15NO6	CHNO
268.119	0	0	6.79	6.78	6.8	6.75	0	7.11	13	19	5	1	0	0.15	C13H19NO5	CHNO
269.03	0	0	0	0	0	6.68	0	0	11	10	8	0	0	-0.18	C11H10O8	CHO
269.034	0	0	0	6.88	0	7.02	6.68	0	8	14	8	0	1	0.06	C8H14O8S	CHOS
269.067	0	6.8	0	7.57	6.8	7.76	7.66	7.29	12	14	7	0	0	0.01	C12H14O7	CHO
269.07	0	0	0	7.17	0	7.37	7.12	0	9	18	7	0	1	-0.01	C9H18O7S	CHOS
269.103	7.07	7.54	7.56	8.1	7.57	7.94	7.87	7.91	13	18	6	0	0	0.15	C13H18O6	CHO
269.114	0	0	0	0	0	0	0	6.71	12	18	5	2	0	0.13	C12H18N2O5	CHNO
269.139	7.43	7.67	7.91	8.32	7.75	7.5	7.5	8.11	14	22	5	0	0	0.16	C14H22O5	CHO
269.176	6.96	6.93	7.13	7.77	7.14	0	6.67	7.32	15	26	4	0	0	0.11	C15H26O4	CHO
270.062	0	0	0	7.1	0	7.16	6.86	6.87	11	13	7	1	0	0.1	C11H13NO7	CHNO
270.098	0	6.8	6.75	6.84	0	7.26	7.11	7.16	12	17	6	1	0	0.09	C12H17NO6	CHNO
270.135	0	0	6.67	6.73	6.68	6.65	0	7.08	13	21	5	1	0	0.15	C13H21NO5	CHNO
271.039	0	0	0	0	0	6.67	0	0	10	12	5	2	1	-0.04	C10H12N2O5S	CHNOS
271.046	0	0	0	6.82	0	7.41	7.11	6.73	11	12	8	0	0	0.11	C11H12O8	CHO
271.057	6.66	0	6.66	0	0	0	0	0	10	12	7	2	0	0.2	C10H12N2O7	CHNO
271.082	6.78	7.32	7.08	8.03	7.29	8.28	8.17	7.78	12	16	7	0	0	0.06	C12H16O7	CHO
271.094	0	0	0	0	0	0	0	6.74	11	16	6	2	0	0.08	C11H16N2O6	CHNO
271.119	7.36	7.74	7.82	8.22	7.71	7.99	7.95	8.12	13	20	6	0	0	0.2	C13H20O6	CHO
271.155	7.23	7.36	7.53	7.98	7.44	7.26	7.25	7.83	14	24	5	0	0	0.14	C14H24O5	CHO
271.192	0	0	0	7.18	0	0	6.83	6.89	15	28	4	0	0	0.13	C15H28O4	CHO
272.078	0	0	0	6.85	0	7.25	7.05	6.96	11	15	7	1	0	0.11	C11H15NO7	CHNO
272.114	0	0	0	7.18	0	7.09	6.97	7.12	12	19	6	1	0	0.15	C12H19NO6	CHNO
272.187	0	0	0	7.36	0	0	0	0	14	27	4	1	0	0.08	C14H27NO4	CHNO
273.062	0	0	0	7.26	0	7.85	7.61	7.1	11	14	8	0	0	0.09	C11H14O8	CHO
273.073	6.81	0	6.74	6.9	0	0	0	0	10	14	7	2	0	0.13	C10H14N2O7	CHNO
273.077	0	0	0	6.72	0	0	0	0	15	14	5	0	0	0.07	C15H14O5	CHO
273.098	6.9	7.46	7.45	8.08	7.38	8.33	8.27	7.99	12	18	7	0	0	0.17	C12H18O7	CHO
273.134	7.13	7.46	7.59	7.91	7.47	7.59	7.56	7.88	13	22	6	0	0	0.1	C13H22O6	CHO
273.171	6.82	6.75	6.78	7.36	6.96	6.72	6.73	7.23	14	26	5	0	0	0.03	C14H26O5	CHO
273.207	0	0	0	6.78	0	0	0	0	15	30	4	0	0	0.1	C15H30O4	CHO
274.057	0	0	0	7.15	6.67	6.85	6.74	6.81	10	13	8	1	0	0.24	C10H13NO8	CHNO
274.093	0	0	0	7.61	6.85	7.04	6.9	6.93	11	17	7	1	0	0	C11H17NO7	CHNO
274.13	0	0	0	0	0	0	0	6.66	12	21	6	1	0	0.05	C12H21NO6	CHNO
275.052	6.74	0	0	0	0	0	0	0	9	12	8	2	0	0.15	C9H12N2O8	CHNO
275.056	0	0	0	6.73	0	0	0	6.66	14	12	6	0	0	0.05	C14H12O6	CHO
275.077	0	0	0	7.34	0	7.88	7.69	7.18	11	16	8	0	0	0.09	C11H16O8	CHO
275.093	0	0	0	7.03	6.7	6.67	0	6.98	15	16	5	0	0	0.14	C15H16O5	CHO
275.114	6.7	7.13	7.23	7.77	7.04	7.65	7.55	7.67	12	20	7	0	0	0.15	C12H20O7	CHO
275.129	0	0	0	6.99	6.67	0	0	6.82	16	20	4	0	0	0.03	C16H20O4	CHO
275.15	0	0	6.79	7.22	6.68	6.75	6.78	7.07	13	24	6	0	0	0.09	C13H24O6	CHO
275.165	0	0	0	6.93	0	0	0	0	17	24	3	0	0	0.11	C17H24O3	CHO
275.169	0	0	0	0	0	0	0	0	14	28	3	0	1	0.26	C14H28O3S	CHOS
276.073	0	6.91	6.85	7.56	7.02	7.14	7.1	7.1	10	15	8	1	0	0.11	C10H15NO8	CHNO
276.088	0	0	0	0	0	0	0	6.69	14	15	5	1	0	-0.08	C14H15NO5	CHNO
277.039	0	6.7	0	7.17	0	7.24	6.95	6.74	10	14	7	0	1	0.06	C10H14O7S	CHOS
277.056	0	0	0	0	0	6.9	0	0	10	14	9	0	0	-0.08	C10H14O9	CHO
277.072	0	6.72	0	7.08	6.7	6.93	6.85	7	14	14	6	0	0	-0.02	C14H14O6	CHO
277.075	0	0	0	6.75	0	0	6.65	0	11	18	6	0	1	0.13	C11H18O6S	CHOS
277.093	0	0	0	7.23	0	7.26	7.12	6.89	11	18	8	0	0	0.07	C11H18O8	CHO
277.108	0	6.88	6.79	7.37	6.95	6.89	6.9	7.16	15	18	5	0	0	-0.04	C15H18O5	CHO
277.119	0	0	0	0	0	0	0	6.81	14	18	4	2	0	-0.03	C14H18N2O4	CHNO
277.129	0	0	6.65	6.9	0	6.85	6.68	6.96	12	22	7	0	0	-0.01	C12H22O7	CHO
277.145	0	6.77	6.76	7.23	6.9	0	0	6.91	16	22	4	0	0	0.1	C16H22O4	CHO
278.052	0	0	0	6.85	0	6.66	0	0	9	13	9	1	0	0.04	C9H13NO9	CHNO
278.067	0	0	0	0	0	6.66	0	6.76	13	13	6	1	0	-0.14	C13H13NO6	CHNO
278.088	0	6.71	0	7.37	6.73	6.86	6.9	6.9	10	17	8	1	0	0.17	C10H17NO8	CHNO
278.103	0	0	0	6.71	6.64	6.72	0	6.9	14	17	5	1	0	0.09	C14H17NO5	CHNO
278.14	0	0	0	0	0	0	0	6.76	15	21	4	1	0	0.02	C15H21NO4	CHNO
279.018	0	0	0	7.22	0	7.21	6.87	0	9	12	8	0	1	0.11	C9H12O8S	CHOS
279.051	0	0	0	0	0	6.9	6.79	6.67	13	12	7	0	0	0.07	C13H12O7	CHO
279.054	7.04	7.46	7.06	8.11	7.29	8.19	7.93	7.49	10	16	7	0	1	0.15	C10H16O7S	CHOS
279.087	0	6.91	6.78	7.49	6.93	7.16	7.09	7.22	14	16	6	0	0	0.07	C14H16O6	CHO
279.091	6.69	6.67	0	6.76	0	6.84	6.71	0	11	20	6	0	1	0.03	C11H20O6S	CHOS
279.099	0	0	0	0	0	6.67	0	6.71	13	16	5	2	0	-0.07	C13H16N2O5	CHNO
279.124	6.82	7.21	7.28	7.66	7.27	7.08	7.04	7.48	15	20	5	0	0	0.02	C15H20O5	CHO
279.135	0	0	0	0	0	0	0	6.71	14	20	4	2	0	0.11	C14H20N2O4	CHNO
279.16	0	0	6.81	7.11	6.82	0	0	7.07	16	24	4	0	0	0.09	C16H24O4	CHO
280.083	0	0	0	6.69	0	6.93	6.75	6.85	13	15	6	1	0	0.07	C13H15NO6	CHNO
280.104	0	0	0	6.66	0	0	0	0	10	19	8	1	0	0.06	C10H19NO8	CHNO
280.119	0	6.68	6.73	6.74	6.77	0	6.72	7.03	14	19	5	1	0	0.13	C14H19NO5	CHNO
281.034	0	6.78	0	7.52	0	7.8	7.43	6.77	9	14	8	0	1	0	C9H14O8S	CHOS
281.067	0	0	0	7.27	6.72	7.32	7.22	7.12	13	14	7	0	0	-0.01	C13H14O7	CHO
281.07	7.29	7.76	7.76	7.98	7.67	8.06	7.87	8.12	10	18	7	0	1	0.05	C10H18O7S	CHOS
281.078	0	0	0	0	0	6.73	0	6.72	12	14	6	2	0	0.07	C12H14N2O6	CHNO
281.103	6.91	7.32	7.36	7.9	7.42	7.59	7.49	7.74	14	18	6	0	0	0.04	C14H18O6	CHO
281.106	0	0	0	6.66	0	0	0	0	11	22	6	0	1	0.1	C11H22O6S	CHOS
281.114	0	0	6.66	0	0	6.65	0	6.94	13	18	5	2	0	0.06	C13H18N2O5	CHNO
281.139	7.11	7.5	7.67	8.08	7.59	7.25	7.19	7.85	15	22	5	0	0	0.13	C15H22O5	CHO
281.176	0	6.7	6.74	7.29	6.79	0	6.66	7.06	16	26	4	0	0	0.12	C16H26O4	CHO
282.062	0	0	0	0	0	7.02	6.75	6.79	12	13	7	1	0	0.17	C12H13NO7	CHNO
282.098	0	6.71	0	6.86	6.75	7.17	6.98	7.14	13	17	6	1	0	0.14	C13H17NO6	CHNO
282.135	0	6.68	6.88	6.69	6.81	6.7	0	7.12	14	21	5	1	0	-0.01	C14H21NO5	CHNO
283.013	0	0	0	0	0	6.67	0	0	8	12	9	0	1	-0.21	C8H12O9S	CHOS
283.046	0	0	0	6.69	0	7.17	6.95	6.77	12	12	8	0	0	0.02	C12H12O8	CHO
283.049	0	6.79	0	7.38	0	7.61	7.21	6.87	9	16	8	0	1	-0.07	C9H16O8S	CHOS
283.057	6.7	0	6.83	0	0	0	0	0	11	12	7	2	0	0.13	C11H12N2O7	CHNO
283.082	6.69	7.14	7.04	7.82	7.21	7.97	7.86	7.66	13	16	7	0	0	0.04	C13H16O7	CHO
283.086	6.66	7	6.87	7.49	6.7	7.47	7.32	7.37	10	20	7	0	1	0.13	C10H20O7S	CHOS
283.094	0	0	0	0	0	6.89	0	0	12	16	6	2	0	0.09	C12H16N2O6	CHNO
283.119	7.29	7.75	7.84	8.24	7.73	7.92	7.88	8.12	14	20	6	0	0	0.14	C14H20O6	CHO
283.13	0	0	0	6.68	0	0	0	6.79	13	20	5	2	0	0.13	C13H20N2O5	CHNO
283.155	7.26	7.59	7.85	8.26	7.69	7.29	7.33	7.98	15	24	5	0	0	0.11	C15H24O5	CHO
283.192	6.95	6.97	6.77	0	6.94	0	0	0	16	28	4	0	0	0.12	C16H28O4	CHO
283.228	6.91	6.73	0	0	0	0	0	0	17	32	3	0	0	0.14	C17H32O3	CHO
284.078	0	0	0	7	0	7.36	7.2	7.02	12	15	7	1	0	0.06	C12H15NO7	CHNO
284.114	0	6.79	6.86	7.02	6.91	7.16	7.07	7.28	13	19	6	1	0	0.02	C13H19NO6	CHNO
284.15	0	0	6.82	0	6.86	0	0	6.95	14	23	5	1	0	0.02	C14H23NO5	CHNO
285.062	0	0	0	7.4	6.65	7.92	7.72	7.22	12	14	8	0	0	0.09	C12H14O8	CHO
285.065	0	0	0	6.92	0	6.71	0	0	9	18	8	0	1	-0.17	C9H18O8S	CHOS
285.073	6.76	0	6.75	0	0	6.75	0	6.83	11	14	7	2	0	-0.09	C11H14N2O7	CHNO
285.098	7.08	7.55	7.5	8.22	7.55	8.41	8.36	8.05	13	18	7	0	0	0.03	C13H18O7	CHO
285.109	0	0	6.65	0	0	6.82	0	6.94	12	18	6	2	0	-0.04	C12H18N2O6	CHNO
285.134	7.53	7.85	8.03	8.37	7.9	8	7.92	8.3	14	22	6	0	0	-0.01	C14H22O6	CHO
285.171	7.25	7.38	7.69	8	7.56	7.04	7.04	7.83	15	26	5	0	0	-0.04	C15H26O5	CHO
285.207	7.1	7.07	6.91	7.38	7.01	0	6.89	7.2	16	30	4	0	0	0.03	C16H30O4	CHO
286.057	0	0	0	6.68	0	6.99	6.8	6.73	11	13	8	1	0	0.15	C11H13NO8	CHNO
286.093	0	6.79	6.77	7.13	6.74	7.43	7.3	7.21	12	17	7	1	0	0.07	C12H17NO7	CHNO
286.13	0	0	6.8	6.88	6.71	7.01	6.99	7.17	13	21	6	1	0	-0.02	C13H21NO6	CHNO
287.041	0	0	0	0	0	7.17	6.95	0	11	12	9	0	0	-0.1	C11H12O9	CHO
287.052	6.76	0	0	0	0	0	0	0	10	12	8	2	0	0.2	C10H12N2O8	CHNO
287.077	0	7.03	6.87	7.8	7.06	8.38	8.21	7.59	12	16	8	0	0	-0.03	C12H16O8	CHO
287.088	0	0	0	0	0	6.82	0	6.75	11	16	7	2	0	-0.02	C11H16N2O7	CHNO
287.093	0	0	0	6.7	0	0	0	6.67	16	16	5	0	0	0.04	C16H16O5	CHO
287.108	0	0	0	6.84	0	0	0	0	20	16	2	0	0	-0.07	C20H16O2	CHO
287.114	7.21	7.73	7.74	8.22	7.65	8.31	8.25	8.19	13	20	7	0	0	0.01	C13H20O7	CHO
287.129	0	0	0	6.69	0	0	0	6.69	17	20	4	0	0	-0.03	C17H20O4	CHO
287.15	7.22	7.51	7.66	8.05	7.5	7.49	7.5	7.92	14	24	6	0	0	0.05	C14H24O6	CHO
287.186	0	0	6.7	7.26	6.8	0	0	7.09	15	28	5	0	0	0.07	C15H28O5	CHO
287.198	0	0	0	7.11	0	0	0	0	14	28	4	2	0	0.1	C14H28N2O4	CHNO
288.073	0	0	0	7.13	0	7.1	6.95	6.84	11	15	8	1	0	0.13	C11H15NO8	CHNO
288.109	0	0	0	7.14	0	7.1	7	7.03	12	19	7	1	0	0.2	C12H19NO7	CHNO
289.056	0	0	0	6.75	0	7.55	7.23	6.84	11	14	9	0	0	-0.06	C11H14O9	CHO
289.068	0	0	6.81	0	0	0	0	0	10	14	8	2	0	0.05	C10H14N2O8	CHNO
289.072	0	0	0	6.8	0	6.71	6.75	6.8	15	14	6	0	0	-0.05	C15H14O6	CHO
289.093	0	7.15	6.99	7.75	7.05	8.25	8.08	7.69	12	18	8	0	0	-0.01	C12H18O8	CHO
289.108	0	0	0	7.09	0	0	0	6.96	16	18	5	0	0	0.09	C16H18O5	CHO
289.123	6.74	0	6.73	7.24	0	0	0	0	20	18	2	0	0	-0.03	C20H18O2	CHO
289.129	7	7.39	7.56	7.83	7.33	7.59	7.57	7.83	13	22	7	0	0	0	C13H22O7	CHO
289.145	0	0	0	6.94	6.66	0	0	6.88	17	22	4	0	0	0.13	C17H22O4	CHO
289.166	0	0	6.78	7.3	6.89	6.73	6.74	7.14	14	26	6	0	0	0.11	C14H26O6	CHO
289.181	0	0	0	6.76	0	0	0	0	18	26	3	0	0	0.1	C18H26O3	CHO
289.217	0	0	0	6.81	0	0	0	0	19	30	2	0	0	0.06	C19H30O2	CHO
290.052	0	0	0	7.09	0	6.75	6.74	0	10	13	9	1	0	0.05	C10H13NO9	CHNO
290.088	0	0	0	7.18	0	6.92	6.78	6.73	11	17	8	1	0	0.07	C11H17NO8	CHNO
290.103	0	6.72	0	7.05	0	0	0	6.84	15	17	5	1	0	0.08	C15H17NO5	CHNO
290.125	0	0	0	6.82	0	0	0	0	12	21	7	1	0	0.06	C12H21NO7	CHNO
291.051	0	0	0	6.75	0	6.86	6.76	6.71	14	12	7	0	0	0.01	C14H12O7	CHO
291.054	0	6.67	0	6.92	0	6.89	0	0	11	16	7	0	1	-0.07	C11H16O7S	CHOS
291.072	0	0	0	0	0	7.37	7.09	6.76	11	16	9	0	0	-0.09	C11H16O9	CHO
291.083	7.19	0	7.1	6.94	0	0	0	0	10	16	8	2	0	0.01	C10H16N2O8	CHNO
291.087	0	0	0	7.22	6.76	7.06	7	7.09	15	16	6	0	0	-0.01	C15H16O6	CHO
291.091	0	0	0	6.73	0	0	0	0	12	20	6	0	1	0.02	C12H20O6S	CHOS
291.099	0	0	0	0	0	0	0	6.77	14	16	5	2	0	0.06	C14H16N2O5	CHNO
291.109	0	6.74	6.81	7.52	0	7.59	7.44	7.32	12	20	8	0	0	-0.02	C12H20O8	CHO
291.124	6.67	6.76	6.76	7.33	7	6.94	6.69	7.23	16	20	5	0	0	0	C16H20O5	CHO
291.135	0	0	0	0	0	0	0	6.67	15	20	4	2	0	-0.04	C15H20N2O4	CHNO
291.145	0	6.72	6.91	7.06	0	6.72	6.71	7.14	13	24	7	0	0	-0.11	C13H24O7	CHO
291.197	0	0	0	7.01	0	0	0	0	18	28	3	0	0	0.09	C18H28O3	CHO
292.067	0	6.8	6.66	7.38	6.87	6.93	7	6.83	10	15	9	1	0	-0.05	C10H15NO9	CHNO
292.083	0	0	0	6.7	0	6.87	6.68	6.84	14	15	6	1	0	0.11	C14H15NO6	CHNO
292.104	0	0	0	7.1	0	0	0	0	11	19	8	1	0	-0.07	C11H19NO8	CHNO
292.119	0	0	0	6.69	6.72	6.66	0	6.97	15	19	5	1	0	-0.04	C15H19NO5	CHNO
293.034	0	6.78	0	7.44	0	7.44	7.16	0	10	14	8	0	1	-0.03	C10H14O8S	CHOS
293.067	0	0	0	7.19	6.72	7.16	7.08	7.06	14	14	7	0	0	0.03	C14H14O7	CHO
293.07	6.86	6.92	0	7.25	6.79	7.38	7.29	6.9	11	18	7	0	1	0	C11H18O7S	CHOS
293.072	6.67	0	0	0	0	0	0	0	20	10	1	2	0	0.36	C20H10N2O	CHNO
293.078	0	0	0	0	0	0	0	6.72	13	14	6	2	0	-0.1	C13H14N2O6	CHNO
293.088	0	0	0	0	0	6.74	0	0	11	18	9	0	0	0.26	C11H18O9	CHO
293.099	0	0	0	6.82	0	0	0	0	10	18	8	2	0	0.08	C10H18N2O8	CHNO
293.103	6.77	7.03	6.92	7.61	7.1	7.28	7.19	7.39	15	18	6	0	0	-0.01	C15H18O6	CHO
293.106	0	0	0	0	0	6.67	6.69	0	12	22	6	0	1	-0.12	C12H22O6S	CHOS
293.114	0	0	6.69	0	0	0	0	6.84	14	18	5	2	0	-0.13	C14H18N2O5	CHNO
293.124	0	0	0	0	0	0	0	6.66	12	22	8	0	0	0.03	C12H22O8	CHO
293.139	6.77	6.99	7.07	7.45	7.17	7.06	6.98	7.4	16	22	5	0	0	-0.05	C16H22O5	CHO
293.151	0	0	0	0	0	0	0	6.71	15	22	4	2	0	-0.03	C15H22N2O4	CHNO
293.212	6.67	0	6.91	7.26	6.86	0	6.67	0	18	30	3	0	0	-0.08	C18H30O3	CHO
294.062	0	0	0	0	0	6.82	0	6.68	13	13	7	1	0	-0.02	C13H13NO7	CHNO
294.065	7.38	8.12	7.22	7.12	7.8	0	0	7.09	10	17	7	1	1	0.08	C10H17NO7S	CHNOS
294.083	0	0	0	7.08	0	6.71	0	6.71	10	17	9	1	0	-0.11	C10H17NO9	CHNO
294.098	0	0	0	6.78	6.68	6.99	6.87	7.04	14	17	6	1	0	0.03	C14H17NO6	CHNO
294.135	0	0	6.72	6.74	6.83	0	0	6.95	15	21	5	1	0	0.02	C15H21NO5	CHNO
294.244	6.76	6.99	0	0	0	0	0	0	18	33	2	1	0	0.12	C18H33NO2	CHNO
295.013	0	0	0	6.73	0	6.8	0	0	9	12	9	0	1	-0.02	C9H12O9S	CHOS
295.046	0	0	0	0	0	6.97	6.73	0	13	12	8	0	0	-0.03	C13H12O8	CHO
295.049	6.74	7.27	6.85	7.98	7.01	8.06	7.68	7.29	10	16	8	0	1	0.08	C10H16O8S	CHOS
295.082	0	6.9	6.82	7.54	7.01	7.56	7.39	7.33	14	16	7	0	0	0.03	C14H16O7	CHO
295.086	6.95	6.89	0	7.36	6.78	7.51	7.36	6.97	11	20	7	0	1	0.17	C11H20O7S	CHOS
295.094	0	0	0	0	0	6.88	0	6.91	13	16	6	2	0	0.09	C13H16N2O6	CHNO
295.119	7.04	7.49	7.53	7.97	7.54	7.65	7.53	7.8	15	20	6	0	0	-0.02	C15H20O6	CHO
295.13	0	0	6.75	0	0	0	6.66	6.86	14	20	5	2	0	-0.06	C14H20N2O5	CHNO
295.155	6.98	7.16	7.28	7.62	7.21	7.08	7.04	7.56	16	24	5	0	0	-0.02	C16H24O5	CHO
295.191	0	0	6.73	7.23	6.86	0	0	7	17	28	4	0	0	0	C17H28O4	CHO
296.045	0	6.98	0	6.99	6.82	0	0	0	9	15	8	1	1	0.03	C9H15NO8S	CHNOS
296.078	0	0	0	6.69	0	7.24	7	7	13	15	7	1	0	-0.13	C13H15NO7	CHNO
296.114	0	6.76	6.81	6.97	6.83	7.05	7.04	7.21	14	19	6	1	0	-0.03	C14H19NO6	CHNO
296.15	0	6.72	6.83	6.74	6.9	0	0	7.06	15	23	5	1	0	0.07	C15H23NO5	CHNO
297.029	0	0	0	7.08	0	7.24	6.91	0	9	14	9	0	1	0.04	C9H14O9S	CHOS
297.062	0	0	0	7.19	6.73	7.5	7.34	7.09	13	14	8	0	0	0.17	C13H14O8	CHO
297.065	6.84	7.39	7.34	8.01	7.3	7.93	7.68	7.78	10	18	8	0	1	0.14	C10H18O8S	CHOS
297.073	6.67	0	6.75	6.89	0	6.83	0	6.84	12	14	7	2	0	-0.02	C12H14N2O7	CHNO
297.098	6.89	7.36	7.29	8.01	7.42	7.99	7.89	7.83	14	18	7	0	0	0.13	C14H18O7	CHO
297.101	0	0	0	6.84	0	6.96	6.98	0	11	22	7	0	1	0.11	C11H22O7S	CHOS
297.109	0	0	6.79	6.66	0	6.86	0	6.96	13	18	6	2	0	0.08	C13H18N2O6	CHNO
297.134	7.38	7.86	7.95	8.32	7.79	7.83	7.76	8.19	15	22	6	0	0	0.12	C15H22O6	CHO
297.146	0	0	0	0	0	0	0	6.79	14	22	5	2	0	0.12	C14H22N2O5	CHNO
297.171	6.95	7.09	7.28	7.89	7.22	7.07	7.03	7.66	16	26	5	0	0	0.1	C16H26O5	CHO
297.207	0	0	0	7.22	0	0	6.69	6.89	17	30	4	0	0	0.27	C17H30O4	CHO
297.28	6.81	0	0	0	0	0	0	6.74	19	38	2	0	0	0.04	C19H38O2	CHO
298.024	0	0	0	6.78	0	0	0	0	8	13	9	1	1	0.04	C8H13NO9S	CHNOS
298.057	0	0	0	6.77	0	7.14	6.88	6.83	12	13	8	1	0	-0.02	C12H13NO8	CHNO
298.093	0	0	6.67	7.01	6.65	7.5	7.3	7.19	13	17	7	1	0	-0.05	C13H17NO7	CHNO
298.13	0	6.89	7.01	6.95	7.08	7.11	7	7.33	14	21	6	1	0	-0.07	C14H21NO6	CHNO
298.166	0	0	0	0	6.68	0	0	6.8	15	25	5	1	0	0.06	C15H25NO5	CHNO
299.041	0	0	0	0	0	7.08	6.89	0	12	12	9	0	0	-0.04	C12H12O9	CHO
299.044	0	0	0	0	0	6.84	0	0	9	16	9	0	1	-0.11	C9H16O9S	CHOS
299.052	6.75	0	6.78	0	0	0	0	0	11	12	8	2	0	-0.09	C11H12N2O8	CHNO
299.054	0	0	0	6.86	0	0	0	0	20	12	1	0	1	0.29	C20H12OS	CHOS
299.077	0	6.9	6.81	7.74	7.02	8.16	7.98	7.56	13	16	8	0	0	0.05	C13H16O8	CHO
299.081	0	0	0	7.36	0	7.25	6.88	6.71	10	20	8	0	1	0.04	C10H20O8S	CHOS
299.088	0	6.68	6.84	0	0	7.06	6.71	6.87	12	16	7	2	0	-0.03	C12H16N2O7	CHNO
299.114	7.33	7.82	7.83	8.34	7.8	8.33	8.28	8.25	14	20	7	0	0	0.08	C14H20O7	CHO
299.125	0	0	6.71	0	0	0	0	6.95	13	20	6	2	0	-0.03	C13H20N2O6	CHNO
299.15	7.52	7.86	8.05	8.37	7.87	7.67	7.68	8.22	15	24	6	0	0	0.11	C15H24O6	CHO
299.186	7.07	7.04	7.11	7.65	7.11	6.96	6.97	7.57	16	28	5	0	0	0.09	C16H28O5	CHO
299.202	0	0	0	6.76	0	0	0	0	20	28	2	0	0	0.01	C20H28O2	CHO
299.223	6.82	6.71	0	6.9	0	0	6.89	6.82	17	32	4	0	0	0.11	C17H32O4	CHO
300.04	0	0	0	6.99	0	6.74	6.71	0	8	15	9	1	1	0.15	C8H15NO9S	CHNOS
300.073	0	0	0	7.63	0	7.38	7.25	7.08	12	15	8	1	0	0.08	C12H15NO8	CHNO
300.109	0	6.89	6.76	7.35	6.8	7.43	7.33	7.31	13	19	7	1	0	0.17	C13H19NO7	CHNO
300.145	0	6.73	6.77	6.81	6.79	6.76	6.71	7.18	14	23	6	1	0	0.15	C14H23NO6	CHNO
301.057	0	0	0	6.99	0	7.74	7.53	7.02	12	14	9	0	0	0.14	C12H14O9	CHO
301.068	6.78	6.66	6.71	0	0	6.72	0	0	11	14	8	2	0	-0.09	C11H14N2O8	CHNO
301.072	0	0	0	6.83	0	0	0	0	16	14	6	0	0	0.05	C16H14O6	CHO
301.093	6.83	7.38	7.27	8.03	7.37	8.47	8.35	7.88	13	18	8	0	0	0.08	C13H18O8	CHO
301.104	0	0	0	0	0	6.88	0	6.77	12	18	7	2	0	-0.16	C12H18N2O7	CHNO
301.108	0	0	0	6.86	0	0	0	6.72	17	18	5	0	0	0.12	C17H18O5	CHO
301.129	7.45	7.87	7.95	8.31	7.75	8.17	8.16	8.29	14	22	7	0	0	0.07	C14H22O7	CHO
301.144	0	0	0	6.77	0	0	0	0	18	22	4	0	0	-0.12	C18H22O4	CHO
301.166	7.2	7.42	7.72	7.97	7.5	7.42	7.55	7.85	15	26	6	0	0	0.05	C15H26O6	CHO
301.202	6.77	6.79	6.86	7.38	6.9	0	0	7.23	16	30	5	0	0	0	C16H30O5	CHO
301.238	0	0	0	6.7	0	0	0	0	17	34	4	0	0	0.14	C17H34O4	CHO
302.052	0	0	0	0	0	6.84	0	6.67	11	13	9	1	0	-0.12	C11H13NO9	CHNO
302.088	0	6.85	6.71	7.97	6.93	7.49	7.31	7.24	12	17	8	1	0	-0.06	C12H17NO8	CHNO
302.125	0	6.66	6.69	7.15	6.78	7.15	7.1	7.09	13	21	7	1	0	-0.02	C13H21NO7	CHNO
303.047	6.67	0	6.66	0	0	0	0	0	10	12	9	2	0	-0.04	C10H12N2O9	CHNO
303.054	0	0	0	6.66	0	0	0	0	12	16	7	0	1	0.07	C12H16O7S	CHOS
303.072	0	0	0	7.22	6.65	7.94	7.68	7.14	12	16	9	0	0	0.11	C12H16O9	CHO
303.083	0	0	0	0	0	0	0	6.66	11	16	8	2	0	0	C11H16N2O8	CHNO
303.087	0	0	0	7.01	6.76	6.85	6.73	6.93	16	16	6	0	0	-0.14	C16H16O6	CHO
303.109	6.85	7.38	7.41	8.03	7.34	8.2	8.1	7.92	13	20	8	0	0	0.1	C13H20O8	CHO
303.124	0	6.7	0	7.15	6.87	6.67	6.68	7	17	20	5	0	0	-0.09	C17H20O5	CHO
303.145	7.19	7.55	7.76	7.86	7.38	7.56	7.52	8.01	14	24	7	0	0	0.09	C14H24O7	CHO
303.16	0	0	0	6.91	6.65	0	0	6.86	18	24	4	0	0	-0.07	C18H24O4	CHO
303.181	0	0	6.82	7.19	6.77	0	6.65	7.11	15	28	6	0	0	0.18	C15H28O6	CHO
303.218	0	0	0	6.67	0	0	0	0	16	32	5	0	0	0.08	C16H32O5	CHO
304.067	0	0	0	7.06	0	6.94	6.79	0	11	15	9	1	0	0.03	C11H15NO9	CHNO
304.083	0	0	0	0	0	6.71	0	6.78	15	15	6	1	0	-0.15	C15H15NO6	CHNO
304.104	0	6.74	0	7.43	6.72	7.01	6.95	6.94	12	19	8	1	0	0.09	C12H19NO8	CHNO
304.119	0	6.7	6.69	7.2	0	6.67	0	6.9	16	19	5	1	0	-0.03	C16H19NO5	CHNO
304.14	0	0	0	6.77	0	0	0	0	13	23	7	1	0	0.1	C13H23NO7	CHNO
305.034	0	0	0	0	0	6.68	0	0	11	14	8	0	1	-0.26	C11H14O8S	CHOS
305.051	0	0	0	0	0	6.84	0	0	11	14	10	0	0	0.15	C11H14O10	CHO
305.067	0	0	0	6.84	6.76	7.02	6.97	6.91	15	14	7	0	0	-0.08	C15H14O7	CHO
305.07	0	0	0	7.06	0	6.97	6.78	6.67	12	18	7	0	1	-0.13	C12H18O7S	CHOS
305.088	0	0	0	7.18	0	7.71	7.48	7.13	12	18	9	0	0	0.2	C12H18O9	CHO
305.103	0	6.8	0	7.35	6.95	7.11	6.98	7.19	16	18	6	0	0	-0.06	C16H18O6	CHO
305.114	0	0	0	0	0	0	0	6.71	15	18	5	2	0	0.2	C15H18N2O5	CHNO
305.124	0	7.26	7.23	7.67	6.89	7.6	7.53	7.72	13	22	8	0	0	0.12	C13H22O8	CHO
305.139	6.72	6.97	7	7.49	7.09	6.69	6.72	7.38	17	22	5	0	0	-0.08	C17H22O5	CHO
305.161	0	6.7	6.94	7.05	6.72	0	0	7.18	14	26	7	0	0	0.08	C14H26O7	CHO
305.176	0	6.71	6.83	7.22	6.86	0	0	7.23	18	26	4	0	0	-0.06	C18H26O4	CHO
306.062	0	0	0	0	0	6.73	0	0	14	13	7	1	0	-0.06	C14H13NO7	CHNO
306.083	0	0	0	7.2	0	6.83	6.77	6.67	11	17	9	1	0	-0.07	C11H17NO9	CHNO
306.098	0	6.69	0	6.92	0	6.92	6.81	6.93	15	17	6	1	0	-0.01	C15H17NO6	CHNO
306.135	0	0	0	6.74	6.77	0	0	6.95	16	21	5	1	0	0.02	C16H21NO5	CHNO
306.171	0	0	0	0	0	0	0	6.73	17	25	4	1	0	-0.07	C17H25NO4	CHNO
307.046	0	0	0	0	0	6.85	6.76	0	14	12	8	0	0	-0.05	C14H12O8	CHO
307.049	0	0	0	7.28	0	7.32	7.1	0	11	16	8	0	1	-0.07	C11H16O8S	CHOS
307.078	0	0	0	7.02	0	0	0	0	10	16	9	2	0	0.02	C10H16N2O9	CHNO
307.082	0	6.79	0	7.7	7.07	7.41	7.28	7.29	15	16	7	0	0	-0.1	C15H16O7	CHO
307.086	6.81	6.93	0	7.17	6.79	7.22	7.18	6.81	12	20	7	0	1	-0.12	C12H20O7S	CHOS
307.094	0	0	0	0	0	6.69	0	6.84	14	16	6	2	0	-0.1	C14H16N2O6	CHNO
307.103	0	0	0	6.8	0	7.14	6.91	6.74	12	20	9	0	0	0.06	C12H20O9	CHO
307.119	6.79	7	7.03	7.58	7.2	7.29	7.19	7.44	16	20	6	0	0	-0.11	C16H20O6	CHO
307.13	0	0	0	0	0	6.66	0	6.97	15	20	5	2	0	-0.25	C15H20N2O5	CHNO
307.14	0	0	6.68	7	0	6.97	6.83	7.19	13	24	8	0	0	0.07	C13H24O8	CHO
307.155	6.9	7.07	7.11	7.47	7.23	6.89	6.87	7.46	17	24	5	0	0	-0.1	C17H24O5	CHO
307.166	6.68	0	6.84	7.07	6.73	0	0	6.79	16	24	4	2	0	-0.11	C16H24N2O4	CHNO
307.191	6.74	6.76	6.93	7.42	7.05	0	0	7.08	18	28	4	0	0	-0.01	C18H28O4	CHO
308.045	0	7.1	0	0	6.8	0	0	0	10	15	8	1	1	0.01	C10H15NO8S	CHNOS
308.062	0	0	0	6.9	0	0	0	0	10	15	10	1	0	0.04	C10H15NO10	CHNO
308.078	0	0	0	6.67	0	7.06	6.93	6.89	14	15	7	1	0	-0.02	C14H15NO7	CHNO
308.099	0	0	0	6.88	0	0	0	0	11	19	9	1	0	0.03	C11H19NO9	CHNO
308.114	0	6.74	6.72	6.84	6.88	7	6.86	7.12	15	19	6	1	0	0.08	C15H19NO6	CHNO
308.15	0	6.71	6.79	0	6.86	0	0	6.99	16	23	5	1	0	0.04	C16H23NO5	CHNO
309.029	0	0	0	7.29	0	7.31	7.06	0	10	14	9	0	1	-0.11	C10H14O9S	CHOS
309.062	0	0	0	6.91	0	7.31	7.14	6.96	14	14	8	0	0	-0.16	C14H14O8	CHO
309.065	6.85	6.97	0	7.59	0	7.8	7.6	6.93	11	18	8	0	1	-0.09	C11H18O8S	CHOS
309.073	0	0	0	0	0	6.75	6.69	6.77	13	14	7	2	0	-0.1	C13H14N2O7	CHNO
309.094	0	0	0	6.96	0	0	0	0	10	18	9	2	0	0.02	C10H18N2O9	CHNO
309.098	6.83	7.12	7.05	7.71	7.21	7.67	7.52	7.58	15	18	7	0	0	-0.08	C15H18O7	CHO
309.101	7.01	6.94	0	7.07	6.73	7.26	7.2	6.7	12	22	7	0	1	-0.11	C12H22O7S	CHOS
309.109	0	0	6.75	0	0	6.91	6.75	6.96	14	18	6	2	0	-0.2	C14H18N2O6	CHNO
309.134	6.94	7.32	7.32	7.69	7.4	7.45	7.34	7.69	16	22	6	0	0	-0.01	C16H22O6	CHO
309.146	0	0	6.8	0	0	0	0	6.88	15	22	5	2	0	-0.1	C15H22N2O5	CHNO
309.207	6.96	7.02	6.97	7.54	7.12	0	6.99	7.08	18	30	4	0	0	0.13	C18H30O4	CHO
310.024	0	0	0	6.76	0	0	0	0	9	13	9	1	1	0.02	C9H13NO9S	CHNOS
310.057	0	0	0	6.67	0	6.91	6.74	0	13	13	8	1	0	-0.05	C13H13NO8	CHNO
310.06	7.14	7.49	6.7	7.43	7.47	6.98	7.04	7.17	10	17	8	1	1	-0.01	C10H17NO8S	CHNOS
310.078	0	0	0	0	0	0	0	6.71	10	17	10	1	0	0.1	C10H17NO10	CHNO
310.093	0	0	0	6.94	6.77	7.32	7.17	7.14	14	17	7	1	0	-0.09	C14H17NO7	CHNO
310.13	0	6.92	6.9	7.01	6.94	7.02	6.91	7.29	15	21	6	1	0	-0.04	C15H21NO6	CHNO
310.166	0	0	6.71	0	6.91	0	0	6.99	16	25	5	1	0	-0.06	C16H25NO5	CHNO
311.02	0	0	0	6.89	0	0	0	0	16	8	7	0	0	0.19	C16H8O7	CHO
311.041	0	0	0	0	0	6.92	0	0	13	12	9	0	0	-0.26	C13H12O9	CHO
311.044	0	6.84	0	7.61	0	7.72	7.29	6.94	10	16	9	0	1	-0.04	C10H16O9S	CHOS
311.077	0	6.89	0	7.51	7	7.81	7.68	7.41	14	16	8	0	0	-0.09	C14H16O8	CHO
311.081	0	6.82	0	7.57	0	7.62	7.43	6.87	11	20	8	0	1	-0.14	C11H20O8S	CHOS
311.083	6.75	0	0	0	0	0	0	0	20	12	2	2	0	0.07	C20H12N2O2	CHNO
311.088	0	0	6.69	0	0	6.95	6.73	6.83	13	16	7	2	0	-0.04	C13H16N2O7	CHNO
311.114	7.09	7.6	7.58	8.13	7.64	8.02	7.92	7.98	15	20	7	0	0	-0.03	C15H20O7	CHO
311.117	6.73	0	0	0	0	6.77	0	0	12	24	7	0	1	-0.24	C12H24O7S	CHOS
311.125	0	6.67	6.89	6.73	0	6.84	0	7.06	14	20	6	2	0	-0.1	C14H20N2O6	CHNO
311.15	7.21	7.48	7.57	7.91	7.5	7.56	7.51	7.93	16	24	6	0	0	0.02	C16H24O6	CHO
311.161	0	0	0	0	0	0	0	6.7	15	24	5	2	0	-0.11	C15H24N2O5	CHNO
311.186	6.87	6.98	7.2	7.85	7.11	6.81	6.99	7.49	17	28	5	0	0	0.07	C17H28O5	CHO
312.039	6.91	7.06	0	7.47	7.03	7.09	7.06	6.74	9	15	9	1	1	-0.07	C9H15NO9S	CHNOS
312.072	0	0	0	6.92	0	7.36	7.19	6.94	13	15	8	1	0	-0.04	C13H15NO8	CHNO
312.076	0	6.88	0	6.87	6.89	0	0	0	10	19	8	1	1	-0.03	C10H19NO8S	CHNOS
312.109	0	6.83	6.84	7.13	6.99	7.39	7.26	7.36	14	19	7	1	0	0.08	C14H19NO7	CHNO
312.145	6.67	6.87	7.03	7.17	7.05	6.88	6.83	7.3	15	23	6	1	0	0.05	C15H23NO6	CHNO
312.182	0	0	0	0	0	0	0	6.67	16	27	5	1	0	0.02	C16H27NO5	CHNO
313.056	0	0	0	6.95	0	7.61	7.34	6.99	13	14	9	0	0	-0.04	C13H14O9	CHO
313.06	0	6.77	0	7.52	0	7.47	7.05	6.89	10	18	9	0	1	-0.02	C10H18O9S	CHOS
313.068	0	0	6.73	0	0	6.7	0	0	12	14	8	2	0	-0.08	C12H14N2O8	CHNO
313.093	6.81	7.3	7.24	7.98	7.42	8.31	8.24	7.86	14	18	8	0	0	-0.06	C14H18O8	CHO
313.096	0	0	0	7.09	0	7.05	6.83	0	11	22	8	0	1	-0.05	C11H22O8S	CHOS
313.104	0	0	6.79	0	0	7.13	6.75	7	13	18	7	2	0	-0.09	C13H18N2O7	CHNO
313.129	7.45	7.92	7.99	8.4	7.94	8.19	8.15	8.29	15	22	7	0	0	-0.01	C15H22O7	CHO
313.14	0	0	6.76	0	0	0	0	6.97	14	22	6	2	0	-0.08	C14H22N2O6	CHNO
313.145	0	0	0	6.77	0	0	0	0	19	22	4	0	0	0.02	C19H22O4	CHO
313.166	7.15	7.43	7.56	7.99	7.42	7.48	7.46	7.91	16	26	6	0	0	0.06	C16H26O6	CHO
313.181	0	0	0	6.76	0	0	0	0	20	26	3	0	0	-0.1	C20H26O3	CHO
313.202	6.77	6.8	6.68	7.43	6.75	6.73	6.92	7.27	17	30	5	0	0	0.11	C17H30O5	CHO
314.052	0	0	0	6.69	0	6.95	6.73	0	12	13	9	1	0	0.19	C12H13NO9	CHNO
314.055	6.73	0	0	6.75	0	0	6.69	0	9	17	9	1	1	0	C9H17NO9S	CHNOS
314.088	0	0	0	7.12	6.66	7.5	7.27	7.11	13	17	8	1	0	0.13	C13H17NO8	CHNO
314.125	6.7	6.93	6.92	7.42	7.04	7.37	7.25	7.38	14	21	7	1	0	0.01	C14H21NO7	CHNO
314.161	0	0	0	7.11	6.83	0	0	7.07	15	25	6	1	0	-0.06	C15H25NO6	CHNO
315.036	0	0	0	0	0	6.83	0	0	12	12	10	0	0	-0.19	C12H12O10	CHO
315.072	0	6.71	0	7.47	6.73	8.1	7.87	7.37	13	16	9	0	0	0.04	C13H16O9	CHO
315.076	0	0	0	6.68	0	0	0	0	10	20	9	0	1	-0.01	C10H20O9S	CHOS
315.078	6.73	0	0	0	0	0	0	0	19	12	3	2	0	0.04	C19H12N2O3	CHNO
315.083	0	0	6.67	0	0	6.92	0	6.81	12	16	8	2	0	-0.02	C12H16N2O8	CHNO
315.087	0	0	0	6.78	0	0	0	0	17	16	6	0	0	0.06	C17H16O6	CHO
315.109	7.09	7.7	7.62	8.19	7.68	8.49	8.45	8.18	14	20	8	0	0	-0.11	C14H20O8	CHO
315.12	0	0	6.68	6.67	0	6.71	0	6.95	13	20	7	2	0	-0.04	C13H20N2O7	CHNO
315.124	0	0	0	6.84	0	0	0	6.7	18	20	5	0	0	-0.02	C18H20O5	CHO
315.145	7.51	7.94	8.08	8.49	7.92	8.04	8.05	8.33	15	24	7	0	0	-0.07	C15H24O7	CHO
315.16	0	0	0	6.76	0	0	0	0	19	24	4	0	0	0.04	C19H24O4	CHO
315.197	0	0	0	6.91	0	0	0	0	20	28	3	0	0	-0.13	C20H28O3	CHO
315.218	0	0	0	7.01	6.67	0	6.75	6.88	17	32	5	0	0	0.19	C17H32O5	CHO
316.067	0	0	0	7.42	0	7.26	7.02	6.94	12	15	9	1	0	-0.06	C12H15NO9	CHNO
316.104	0	6.81	6.79	7.53	6.97	7.56	7.43	7.28	13	19	8	1	0	-0.07	C13H19NO8	CHNO
316.14	0	6.84	6.8	7.39	6.98	7.07	6.88	7.29	14	23	7	1	0	-0.14	C14H23NO7	CHNO
316.155	0	0	6.75	0	0	0	0	0	18	23	4	1	0	-0.24	C18H23NO4	CHNO
316.213	0	0	0	0	0	0	0	0	16	31	5	1	0	0.11	C16H31NO5	CHNO
317.051	0	0	0	0	0	7.37	7.04	0	12	14	10	0	0	0.2	C12H14O10	CHO
317.063	6.73	0	6.73	0	0	0	0	6.75	11	14	9	2	0	-0.06	C11H14N2O9	CHNO
317.067	0	0	0	0	0	6.78	0	6.73	16	14	7	0	0	-0.05	C16H14O7	CHO
317.088	0	6.99	6.82	7.61	6.94	8.34	8.17	7.6	13	18	9	0	0	0.04	C13H18O9	CHO
317.099	0	0	0	0	0	0	0	6.72	12	18	8	2	0	0.01	C12H18N2O8	CHNO
317.103	0	0	0	7.08	6.73	6.86	6.71	7.02	17	18	6	0	0	-0.08	C17H18O6	CHO
317.124	7.14	7.67	7.77	8.11	7.6	8.22	8.2	8.15	14	22	8	0	0	0	C14H22O8	CHO
317.139	0	0	0	7.09	6.85	6.75	0	6.99	18	22	5	0	0	0.02	C18H22O5	CHO
317.161	7.19	7.54	7.75	7.9	7.49	7.4	7.36	7.92	15	26	7	0	0	-0.09	C15H26O7	CHO
317.176	0	0	0	7.05	6.79	0	0	6.77	19	26	4	0	0	0.08	C19H26O4	CHO
317.197	6.69	0	6.82	7.16	6.74	0	0	7.16	16	30	6	0	0	-0.03	C16H30O6	CHO
317.212	0	0	0	6.82	0	0	0	0	20	30	3	0	0	0	C20H30O3	CHO
318.083	0	6.86	0	7.5	6.85	7.33	7.18	7.07	12	17	9	1	0	-0.11	C12H17NO9	CHNO
318.098	0	0	0	0	0	6.7	0	6.84	16	17	6	1	0	0	C16H17NO6	CHNO
318.119	0	6.79	6.72	7.46	6.82	7.18	7.09	7.18	13	21	8	1	0	-0.07	C13H21NO8	CHNO
318.135	0	0	0	6.86	6.71	0	0	6.92	17	21	5	1	0	-0.1	C17H21NO5	CHNO
318.156	0	0	0	6.83	0	0	0	0	14	25	7	1	0	-0.04	C14H25NO7	CHNO
318.229	0	0	0	6.89	0	0	0	0	16	33	5	1	0	-0.05	C16H33NO5	CHNO
319.049	0	0	0	7	0	6.87	6.75	0	12	16	8	0	1	-0.04	C12H16O8S	CHOS
319.067	0	0	0	0	0	7.55	7.29	6.84	12	16	10	0	0	-0.13	C12H16O10	CHO
319.082	0	6.7	0	7.31	6.8	7.14	7.03	7.07	16	16	7	0	0	0.08	C16H16O7	CHO
319.086	0	6.67	0	6.96	0	6.71	6.85	0	13	20	7	0	1	0.09	C13H20O7S	CHOS
319.094	0	0	0	0	0	0	0	6.67	15	16	6	2	0	-0.07	C15H16N2O6	CHNO
319.103	0	7.02	6.91	7.53	6.83	8.11	7.97	7.59	13	20	9	0	0	-0.04	C13H20O9	CHO
319.119	6.69	6.94	6.82	7.46	7.08	7.03	6.98	7.36	17	20	6	0	0	-0.1	C17H20O6	CHO
319.13	0	0	0	0	0	0	0	6.77	16	20	5	2	0	0.02	C16H20N2O5	CHNO
319.14	6.72	7.44	7.57	7.77	7.14	7.55	7.48	7.87	14	24	8	0	0	-0.02	C14H24O8	CHO
319.155	0	6.89	6.9	7.37	7.12	6.77	0	7.39	18	24	5	0	0	-0.12	C18H24O5	CHO
319.176	0	0	6.83	7.05	0	0	0	7.03	15	28	7	0	0	-0.06	C15H28O7	CHO
319.191	0	0	6.78	7.2	6.94	0	0	7.03	19	28	4	0	0	-0.12	C19H28O4	CHO
319.228	0	0	0	6.83	0	0	0	0	20	32	3	0	0	-0.01	C20H32O3	CHO
320.062	0	0	0	6.89	0	6.73	0	0	11	15	10	1	0	-0.15	C11H15NO10	CHNO
320.078	0	0	0	0	0	6.9	6.78	6.88	15	15	7	1	0	0.23	C15H15NO7	CHNO
320.099	6.71	6.79	0	7.55	6.88	7.04	6.97	7.19	12	19	9	1	0	-0.1	C12H19NO9	CHNO
320.114	0	6.79	0	7.16	6.86	6.88	6.87	7.14	16	19	6	1	0	-0.02	C16H19NO6	CHNO
320.135	0	0	0	7.09	0	0	0	0	13	23	8	1	0	-0.01	C13H23NO8	CHNO
320.15	0	6.71	6.78	6.88	6.94	0	0	7.08	17	23	5	1	0	-0.04	C17H23NO5	CHNO
321.029	0	0	0	6.69	0	6.7	0	0	11	14	9	0	1	-0.05	C11H14O9S	CHOS
321.058	0	0	0	6.72	0	0	0	0	10	14	10	2	0	-0.08	C10H14N2O10	CHNO
321.062	0	0	0	6.82	6.66	7.12	6.94	6.95	15	14	8	0	0	0.02	C15H14O8	CHO
321.065	6.69	6.95	0	7.47	6.88	7.41	7.34	6.88	12	18	8	0	1	0.02	C12H18O8S	CHOS
321.083	0	0	0	0	0	7.18	6.97	0	12	18	10	0	0	0.07	C12H18O10	CHO
321.098	0	6.95	6.83	7.71	7.19	7.48	7.34	7.41	16	18	7	0	0	-0.04	C16H18O7	CHO
321.101	7.01	6.84	0	7.12	6.82	7.09	7.01	6.74	13	22	7	0	1	-0.08	C13H22O7S	CHOS
321.109	0	0	0	0	0	6.83	0	6.89	15	18	6	2	0	-0.06	C15H18N2O6	CHNO
321.119	0	6.72	0	7.24	0	7.49	7.38	7.24	13	22	9	0	0	0.11	C13H22O9	CHO
321.134	6.81	7.2	7.15	7.75	7.32	7.34	7.18	7.59	17	22	6	0	0	-0.03	C17H22O6	CHO
321.146	0	0	6.72	6.72	6.67	0	0	6.96	16	22	5	2	0	-0.13	C16H22N2O5	CHNO
321.155	0	6.77	7.04	6.95	0	6.79	0	7.29	14	26	8	0	0	-0.17	C14H26O8	CHO
321.171	6.74	7.05	7.13	7.54	7.24	6.77	6.82	7.49	18	26	5	0	0	-0.12	C18H26O5	CHO
322.057	0	0	0	0	0	6.72	6.68	0	14	13	8	1	0	0.03	C14H13NO8	CHNO
322.078	0	0	0	7.07	0	0	0	0	11	17	10	1	0	-0.04	C11H17NO10	CHNO
322.093	0	0	0	6.81	0	7.07	6.97	7.04	15	17	7	1	0	0.09	C15H17NO7	CHNO
322.097	0	0	0	0	0	6.72	6.75	0	12	21	7	1	1	0	C12H21NO7S	CHNOS
322.13	0	6.95	6.88	6.98	6.91	6.87	6.85	7.18	16	21	6	1	0	0.03	C16H21NO6	CHNO
322.166	0	6.76	6.83	0	6.97	0	0	7.02	17	25	5	1	0	-0.1	C17H25NO5	CHNO
322.202	0	0	0	0	6.66	0	0	0	18	29	4	1	0	0	C18H29NO4	CHNO
322.275	6.83	7.2	0	0	6.75	0	0	6.83	20	37	2	1	0	0.06	C20H37NO2	CHNO
323.041	0	0	0	0	0	6.78	0	0	14	12	9	0	0	-0.3	C14H12O9	CHO
323.044	0	0	0	7.29	0	7.38	7.21	0	11	16	9	0	1	-0.09	C11H16O9S	CHOS
323.073	0	0	0	6.95	0	0	0	0	10	16	10	2	0	0.01	C10H16N2O10	CHNO
323.077	0	6.75	0	7.34	6.91	7.41	7.23	7.2	15	16	8	0	0	-0.05	C15H16O8	CHO
323.081	6.99	7.09	6.71	7.59	6.99	7.63	7.53	7.1	12	20	8	0	1	-0.08	C12H20O8S	CHOS
323.088	0	0	0	0	0	6.87	6.78	6.86	14	16	7	2	0	-0.12	C14H16N2O7	CHNO
323.114	6.85	7.2	7.13	7.74	7.31	7.55	7.51	7.6	16	20	7	0	0	0.05	C16H20O7	CHO
323.117	6.88	6.69	0	6.83	0	6.86	6.89	0	13	24	7	0	1	0.02	C13H24O7S	CHOS
323.125	0	6.71	6.77	6.67	6.74	6.85	6.82	7.09	15	20	6	2	0	-0.01	C15H20N2O6	CHNO
323.15	7.04	7.43	7.42	7.85	7.48	7.31	7.25	7.75	17	24	6	0	0	0.09	C17H24O6	CHO
323.161	0	0	6.88	7	6.68	0	0	6.95	16	24	5	2	0	0.05	C16H24N2O5	CHNO
323.186	6.99	7.27	7.44	7.79	7.41	6.86	7.01	7.61	18	28	5	0	0	-0.08	C18H28O5	CHO
324.039	6.95	7.22	0	7.38	7.35	6.8	6.83	6.83	10	15	9	1	1	0.04	C10H15NO9S	CHNOS
324.072	0	0	0	6.8	0	7.21	6.89	6.81	14	15	8	1	0	0.01	C14H15NO8	CHNO
324.109	0	6.78	6.68	7.06	6.85	7.26	7.15	7.24	15	19	7	1	0	-0.08	C15H19NO7	CHNO
324.145	0	6.92	6.95	6.93	6.97	6.91	6.66	7.18	16	23	6	1	0	-0.05	C16H23NO6	CHNO
324.182	0	0	0	0	6.78	0	0	6.8	17	27	5	1	0	0.03	C17H27NO5	CHNO
325.023	0	0	0	6.77	0	6.99	0	0	10	14	10	0	1	-0.05	C10H14O10S	CHOS
325.056	0	0	0	6.74	0	7.3	7.1	6.89	14	14	9	0	0	-0.16	C14H14O9	CHO
325.06	0	6.81	0	7.43	0	7.75	7.47	6.85	11	18	9	0	1	-0.17	C11H18O9S	CHOS
325.068	0	0	0	0	0	6.81	0	0	13	14	8	2	0	-0.16	C13H14N2O8	CHNO
325.089	0	0	0	6.91	0	0	0	0	10	18	10	2	0	0.04	C10H18N2O10	CHNO
325.093	0	7.16	6.96	7.69	7.18	7.83	7.71	7.6	15	18	8	0	0	0	C15H18O8	CHO
325.096	6.82	6.9	0	7.44	6.71	7.38	7.29	6.86	12	22	8	0	1	-0.03	C12H22O8S	CHOS
325.104	0	0	6.71	0	0	7.06	6.73	7.06	14	18	7	2	0	-0.25	C14H18N2O7	CHNO
325.129	7.06	7.53	7.45	7.88	7.5	7.82	7.71	7.89	16	22	7	0	0	0.05	C16H22O7	CHO
325.14	0	0	6.86	0	0	6.69	0	7.09	15	22	6	2	0	-0.04	C15H22N2O6	CHNO
325.166	7.23	7.47	7.57	7.94	7.48	7.41	7.33	7.9	17	26	6	0	0	-0.07	C17H26O6	CHO
325.202	7.06	7.21	7.24	7.86	7.35	6.95	7.12	7.55	18	30	5	0	0	-0.12	C18H30O5	CHO
325.238	0	0	0	6.82	0	0	7.18	0	19	34	4	0	0	-0.1	C19H34O4	CHO
325.311	0	0	0	0	0	0	0	6.91	21	42	2	0	0	0.06	C21H42O2	CHO
326.019	0	0	0	6.8	0	0	0	0	9	13	10	1	1	0.01	C9H13NO10S	CHNOS
326.052	0	0	0	0	0	6.94	6.67	0	13	13	9	1	0	-0.15	C13H13NO9	CHNO
326.055	7.34	7.61	0	7.76	7.46	7.38	7.43	7.24	10	17	9	1	1	-0.04	C10H17NO9S	CHNOS
326.088	0	0	0	7.2	0	7.45	7.24	7.11	14	17	8	1	0	0.12	C14H17NO8	CHNO
326.125	0	7.02	6.91	7.19	6.96	7.31	7.2	7.38	15	21	7	1	0	0.03	C15H21NO7	CHNO
326.161	6.8	6.87	6.9	6.78	6.94	6.77	0	7.19	16	25	6	1	0	-0.13	C16H25NO6	CHNO
327.039	0	0	0	7.01	0	7.2	6.93	0	10	16	10	0	1	0.08	C10H16O10S	CHOS
327.072	0	6.72	0	7.24	6.72	7.87	7.65	7.27	14	16	9	0	0	-0.1	C14H16O9	CHO
327.075	0	6.7	0	7.34	0	7.36	7.17	6.71	11	20	9	0	1	-0.13	C11H20O9S	CHOS
327.083	0	0	0	0	0	7	6.7	6.78	13	16	8	2	0	-0.02	C13H16N2O8	CHNO
327.109	6.96	7.54	7.46	8.05	7.52	8.25	8.19	7.97	15	20	8	0	0	0	C15H20O8	CHO
327.12	0	6.77	6.72	0	0	7.05	6.79	7.12	14	20	7	2	0	-0.1	C14H20N2O7	CHNO
327.145	7.32	7.68	7.68	8.01	7.56	7.91	7.8	8.1	16	24	7	0	0	0.12	C16H24O7	CHO
327.156	0	0	6.68	0	0	0	0	6.83	15	24	6	2	0	-0.14	C15H24N2O6	CHNO
327.181	7.06	7.25	7.45	7.85	7.34	7.26	7.27	7.8	17	28	6	0	0	-0.01	C17H28O6	CHO
327.254	6.69	6.77	0	6.69	0	0	6.96	6.71	19	36	4	0	0	-0.16	C19H36O4	CHO
328.034	0	7.02	0	7.43	6.82	7.04	7	0	9	15	10	1	1	-0.1	C9H15NO10S	CHNOS
328.067	0	0	0	7.09	0	7.26	7.02	6.87	13	15	9	1	0	0.06	C13H15NO9	CHNO
328.071	7.12	7.21	0	7.69	7.15	7.26	7.21	6.92	10	19	9	1	1	0.04	C10H19NO9S	CHNOS
328.104	0	6.88	6.72	7.28	6.86	7.51	7.37	7.27	14	19	8	1	0	0.01	C14H19NO8	CHNO
328.14	6.79	7.06	7.11	7.51	7.15	7.21	7.13	7.41	15	23	7	1	0	-0.11	C15H23NO7	CHNO
328.177	0	0	0	0	0	0	0	6.88	16	27	6	1	0	0.02	C16H27NO6	CHNO
329.03	7.75	0	8.52	8.88	0	0	0	0	16	10	8	0	0	-0.06	C16H10O8	CHO
329.051	0	0	0	0	0	7.37	7.2	0	13	14	10	0	0	-0.04	C13H14O10	CHO
329.055	0	0	0	0	0	6.8	0	0	10	18	10	0	1	-0.09	C10H18O10S	CHOS
329.088	0	7.07	6.85	7.67	7.08	8.27	8.06	7.65	14	18	9	0	0	0.06	C14H18O9	CHO
329.091	0	0	0	6.98	0	0	0	0	11	22	9	0	1	0.05	C11H22O9S	CHOS
329.099	0	0	0	0	0	7.1	0	6.84	13	18	8	2	0	-0.07	C13H18N2O8	CHNO
329.103	0	0	0	6.75	0	0	0	0	18	18	6	0	0	0.15	C18H18O6	CHO
329.124	7.32	7.81	7.84	8.23	7.8	8.36	8.32	8.25	15	22	8	0	0	-0.12	C15H22O8	CHO
329.135	0	0	6.71	6.71	0	0	0	6.92	14	22	7	2	0	-0.06	C14H22N2O7	CHNO
329.139	0	0	0	6.72	0	0	0	0	19	22	5	0	0	-0.14	C19H22O5	CHO
329.161	7.29	7.58	7.7	7.96	7.52	7.7	7.65	8	16	26	7	0	0	-0.07	C16H26O7	CHO
329.176	0	0	0	6.93	0	0	0	0	20	26	4	0	0	-0.1	C20H26O4	CHO
329.197	6.76	6.88	6.9	7.45	6.92	7.04	7.24	7.39	17	30	6	0	0	0.03	C17H30O6	CHO
329.233	7.26	7.41	7.51	8.15	7.76	6.78	6.92	7.27	18	34	5	0	0	0.01	C18H34O5	CHO
330.05	0	6.83	0	7.21	6.73	6.97	6.85	0	9	17	10	1	1	-0.13	C9H17NO10S	CHNOS
330.083	0	0	0	7.24	0	7.44	7.26	6.95	13	17	9	1	0	0.12	C13H17NO9	CHNO
330.119	6.75	6.96	6.8	7.52	7	7.5	7.37	7.38	14	21	8	1	0	0	C14H21NO8	CHNO
330.135	0	0	0	6.69	0	0	0	6.71	18	21	5	1	0	-0.02	C18H21NO5	CHNO
330.156	6.73	6.83	6.95	7.53	7.13	6.92	6.75	7.36	15	25	7	1	0	-0.12	C15H25NO7	CHNO
330.171	0	0	0	0	0	0	0	6.71	19	25	4	1	0	-0.05	C19H25NO4	CHNO
331.067	0	0	0	6.92	0	7.72	7.54	7.01	13	16	10	0	0	0.13	C13H16O10	CHO
331.078	0	0	0	6.75	0	0	0	0	12	16	9	2	0	0.08	C12H16N2O9	CHNO
331.082	0	0	0	6.82	0	6.75	0	6.69	17	16	7	0	0	0.19	C17H16O7	CHO
331.103	0	7.32	7.18	7.84	7.3	8.39	8.36	7.87	14	20	9	0	0	-0.09	C14H20O9	CHO
331.115	0	0	0	0	0	0	0	6.83	13	20	8	2	0	0.07	C13H20N2O8	CHNO
331.119	0	0	0	7.07	0	6.79	0	6.93	18	20	6	0	0	0.04	C18H20O6	CHO
331.14	7.29	7.74	7.85	8.11	7.63	8	7.99	8.16	15	24	8	0	0	0.04	C15H24O8	CHO
331.155	0	0	0	7.13	6.78	0	0	7	19	24	5	0	0	0.05	C19H24O5	CHO
331.176	6.99	7.17	7.24	7.51	7.05	7.22	7.24	7.56	16	28	7	0	0	0.08	C16H28O7	CHO
331.191	0	0	0	7.02	0	0	0	0	20	28	4	0	0	0.01	C20H28O4	CHO
331.213	0	0	0	6.89	0	0	0	6.97	17	32	6	0	0	-0.07	C17H32O6	CHO
331.249	0	0	0	6.68	0	0	0	0	18	36	5	0	0	-0.02	C18H36O5	CHO
332.062	0	0	0	6.91	0	6.93	6.79	6.76	12	15	10	1	0	-0.19	C12H15NO10	CHNO
332.078	0	0	0	0	0	6.71	0	0	16	15	7	1	0	0.03	C16H15NO7	CHNO
332.099	0	6.78	0	7.47	6.92	7.38	7.29	7.08	13	19	9	1	0	0.01	C13H19NO9	CHNO
332.114	0	0	0	6.78	6.66	6.71	0	6.95	17	19	6	1	0	-0.12	C17H19NO6	CHNO
332.135	0	6.8	6.71	7.54	6.93	7.06	6.94	7.2	14	23	8	1	0	0.1	C14H23NO8	CHNO
332.15	0	6.88	7.26	7.61	6.96	0	0	7.05	18	23	5	1	0	-0.05	C18H23NO5	CHNO
332.171	0	0	0	6.87	0	0	0	0	15	27	7	1	0	-0.02	C15H27NO7	CHNO
333.046	0	0	0	0	0	6.79	0	0	12	14	11	0	0	0.1	C12H14O11	CHO
333.062	0	0	0	0	0	6.86	6.9	6.83	16	14	8	0	0	0.14	C16H14O8	CHO
333.065	0	0	0	6.97	0	6.93	6.75	0	13	18	8	0	1	-0.16	C13H18O8S	CHOS
333.083	0	0	0	7.01	0	7.96	7.72	7.17	13	18	10	0	0	0.04	C13H18O10	CHO
333.094	0	0	0	6.74	0	0	0	0	12	18	9	2	0	0.04	C12H18N2O9	CHNO
333.098	0	6.75	0	7.28	6.9	7.2	7.08	7.25	17	18	7	0	0	0.09	C17H18O7	CHO
333.101	6.73	6.8	0	6.98	6.86	6.79	6.86	0	14	22	7	0	1	0.07	C14H22O7S	CHOS
333.109	0	0	0	0	0	0	0	6.76	16	18	6	2	0	-0.07	C16H18N2O6	CHNO
333.119	0	7.33	7.35	7.78	7.19	8.15	8.11	7.94	14	22	9	0	0	-0.08	C14H22O9	CHO
333.134	0	6.93	6.73	7.42	7.08	7.12	6.98	7.4	18	22	6	0	0	-0.12	C18H22O6	CHO
333.146	0	0	0	0	0	0	0	6.75	17	22	5	2	0	0.02	C17H22N2O5	CHNO
333.156	6.99	7.47	7.64	7.77	7.23	7.34	7.26	7.84	15	26	8	0	0	0.05	C15H26O8	CHO
333.171	0	6.89	6.93	7.36	7.05	0	0	7.34	19	26	5	0	0	-0.07	C19H26O5	CHO
333.192	0	0	0	6.75	0	0	0	6.89	16	30	7	0	0	-0.09	C16H30O7	CHO
334.057	0	0	0	0	0	6.69	6.72	0	15	13	8	1	0	0	C15H13NO8	CHNO
334.078	0	0	0	7.29	6.79	6.96	6.92	6.76	12	17	10	1	0	0.13	C12H17NO10	CHNO
334.093	0	0	0	6.77	0	6.99	6.94	6.98	16	17	7	1	0	-0.11	C16H17NO7	CHNO
334.114	0	6.76	0	7.55	6.88	7.07	6.88	7.13	13	21	9	1	0	0.11	C13H21NO9	CHNO
334.13	0	6.94	6.87	7.5	6.88	6.86	6.71	7.18	17	21	6	1	0	0.08	C17H21NO6	CHNO
334.151	0	0	0	7.09	0	0	0	0	14	25	8	1	0	-0.08	C14H25NO8	CHNO
334.166	0	0	6.83	6.74	6.89	0	0	7.02	18	25	5	1	0	0.04	C18H25NO5	CHNO
334.202	0	0	0	0	6.68	0	0	6.69	19	29	4	1	0	-0.04	C19H29NO4	CHNO
335.044	0	0	0	7.19	0	7.17	7.02	0	12	16	9	0	1	-0.11	C12H16O9S	CHOS
335.062	0	0	0	0	0	6.88	0	0	12	16	11	0	0	-0.02	C12H16O11	CHO
335.077	0	0	0	7.14	6.84	7.28	7.12	7.17	16	16	8	0	0	-0.06	C16H16O8	CHO
335.081	6.94	7.11	0	7.45	7.06	7.38	7.38	6.9	13	20	8	0	1	-0.14	C13H20O8S	CHOS
335.088	0	0	0	0	0	6.82	6.68	6.77	15	16	7	2	0	-0.23	C15H16N2O7	CHNO
335.098	0	0	0	6.85	0	7.58	7.32	7.04	13	20	10	0	0	-0.01	C13H20O10	CHO
335.114	6.83	7.18	7.05	7.81	7.3	7.45	7.28	7.52	17	20	7	0	0	-0.01	C17H20O7	CHO
335.117	6.92	6.81	0	7.02	6.76	6.96	6.95	6.74	14	24	7	0	1	0.02	C14H24O7S	CHOS
335.125	0	0	0	6.73	0	6.87	0	6.95	16	20	6	2	0	-0.13	C16H20N2O6	CHNO
335.135	0	7.09	7.13	7.47	6.87	7.53	7.51	7.68	14	24	9	0	0	-0.12	C14H24O9	CHO
335.15	6.91	7.21	7.14	7.67	7.36	7.17	7.1	7.62	18	24	6	0	0	-0.08	C18H24O6	CHO
335.161	0	0	6.75	0	6.71	0	0	6.85	17	24	5	2	0	0.13	C17H24N2O5	CHNO
335.171	0	0	6.73	6.94	0	0	0	6.94	15	28	8	0	0	-0.02	C15H28O8	CHO
335.186	6.88	7.09	7.21	7.75	7.43	6.8	6.75	7.52	19	28	5	0	0	-0.14	C19H28O5	CHO
336.072	0	0	0	0	0	7	6.89	6.82	15	15	8	1	0	-0.17	C15H15NO8	CHNO
336.076	6.69	0	0	0	0	6.93	6.73	0	12	19	8	1	1	-0.32	C12H19NO8S	CHNOS
336.094	0	0	0	7.39	6.85	6.86	6.9	7.03	12	19	10	1	0	0.08	C12H19NO10	CHNO
336.109	0	6.75	0	6.99	6.84	7.14	7.12	7.18	16	19	7	1	0	0.1	C16H19NO7	CHNO
336.145	0	7	6.9	7.02	7.01	6.94	6.86	7.3	17	23	6	1	0	0	C17H23NO6	CHNO
336.182	0	6.85	6.88	0	7.03	0	0	7.06	18	27	5	1	0	-0.13	C18H27NO5	CHNO
336.254	0	6.76	0	0	0	0	0	0	20	35	3	1	0	0.11	C20H35NO3	CHNO
337.023	0	0	0	0	0	6.8	0	0	11	14	10	0	1	-0.27	C11H14O10S	CHOS
337.057	0	0	0	6.73	0	7.13	6.93	6.83	15	14	9	0	0	0.11	C15H14O9	CHO
337.06	6.69	6.87	0	7.62	6.82	7.66	7.47	6.85	12	18	9	0	1	0	C12H18O9S	CHOS
337.093	0	6.92	6.8	7.72	7.17	7.53	7.43	7.43	16	18	8	0	0	-0.02	C16H18O8	CHO
337.096	7.04	7.13	0	7.47	7.03	7.46	7.39	7	13	22	8	0	1	0.1	C13H22O8S	CHOS
337.104	0	0	0	0	0	6.9	6.7	7	15	18	7	2	0	0.2	C15H18N2O7	CHNO
337.114	0	0	0	0	0	6.77	0	0	13	22	10	0	0	-0.02	C13H22O10	CHO
337.133	6.8	0	0	0	0	6.74	6.79	0	14	26	7	0	1	-0.2	C14H26O7S	CHOS
337.14	0	6.72	6.9	6.81	6.79	6.83	0	7.06	16	22	6	2	0	-0.04	C16H22N2O6	CHNO
337.166	7.09	7.41	7.49	7.83	7.53	7.27	7.25	7.79	18	26	6	0	0	0	C18H26O6	CHO
337.177	0	0	0	0	6.75	0	0	6.7	17	26	5	2	0	0.02	C17H26N2O5	CHNO
337.202	6.96	7.06	7.4	7.9	7.49	6.8	6.71	7.68	19	30	5	0	0	0.06	C19H30O5	CHO
337.238	0	0	0	7.03	6.68	0	0	0	20	34	4	0	0	-0.05	C20H34O4	CHO
338.052	0	0	0	0	0	6.83	6.68	0	14	13	9	1	0	0.18	C14H13NO9	CHNO
338.073	0	0	0	0	0	0	0	6.68	11	17	11	1	0	0.01	C11H17NO11	CHNO
338.088	0	0	0	6.93	0	7.35	7.23	7.14	15	17	8	1	0	-0.12	C15H17NO8	CHNO
338.091	0	0	0	0	0	6.86	0	0	12	21	8	1	1	-0.22	C12H21NO8S	CHNOS
338.124	0	7.02	6.95	7.21	7.05	7.29	7.25	7.4	16	21	7	1	0	-0.1	C16H21NO7	CHNO
338.161	0	6.89	7	6.86	7.11	6.75	6.7	7.33	17	25	6	1	0	-0.05	C17H25NO6	CHNO
338.164	0	0	0	7.36	0	0	0	0	14	29	6	1	1	0.01	C14H29NO6S	CHNOS
338.197	0	0	0	0	6.88	0	0	6.85	18	29	5	1	0	-0.14	C18H29NO5	CHNO
338.27	6.71	6.84	0	6.75	0	0	0	0	20	37	3	1	0	0.06	C20H37NO3	CHNO
339.039	0	0	0	7.09	0	7.36	7.03	0	11	16	10	0	1	0	C11H16O10S	CHOS
339.068	0	0	0	6.93	0	0	0	0	10	16	11	2	0	-0.01	C10H16N2O11	CHNO
339.072	0	0	0	7.17	0	7.52	7.42	7.17	15	16	9	0	0	0.13	C15H16O9	CHO
339.076	6.81	7.06	0	7.7	6.87	7.77	7.56	7.11	12	20	9	0	1	0.09	C12H20O9S	CHOS
339.078	6.85	0	0	0	0	0	0	0	21	12	3	2	0	0.25	C21H12N2O3	CHNO
339.083	0	0	0	0	0	6.95	0	6.87	14	16	8	2	0	-0.1	C14H16N2O8	CHNO
339.109	6.81	7.34	7.21	7.83	7.45	7.94	7.85	7.77	16	20	8	0	0	-0.1	C16H20O8	CHO
339.112	6.92	6.83	0	7.29	0	7.27	7.18	6.82	13	24	8	0	1	-0.04	C13H24O8S	CHOS
339.12	0	0	6.7	6.79	0	6.96	6.83	7.09	15	20	7	2	0	-0.03	C15H20N2O7	CHNO
339.145	7.26	7.7	7.75	8.1	7.72	7.81	7.76	8.08	17	24	7	0	0	-0.03	C17H24O7	CHO
339.156	0	0	6.81	0	0	0	0	7.07	16	24	6	2	0	-0.19	C16H24N2O6	CHNO
339.181	7.16	7.45	7.68	8.08	7.59	7.26	7.29	7.98	18	28	6	0	0	0.07	C18H28O6	CHO
339.218	6.8	6.81	6.93	7.63	7.05	6.68	6.94	7.36	19	32	5	0	0	-0.17	C19H32O5	CHO
339.254	0	0	0	6.84	0	0	6.7	0	20	36	4	0	0	-0.3	C20H36O4	CHO
340.034	0	7.09	0	7.29	7.07	6.86	6.86	0	10	15	10	1	1	-0.05	C10H15NO10S	CHNOS
340.067	0	0	0	6.84	0	7.28	7.04	6.86	14	15	9	1	0	-0.05	C14H15NO9	CHNO
340.071	6.83	6.73	0	0	6.75	6.68	0	0	11	19	9	1	1	-0.24	C11H19NO9S	CHNOS
340.104	0	6.82	6.7	7.43	6.83	7.5	7.35	7.33	15	19	8	1	0	0.05	C15H19NO8	CHNO
340.14	6.74	7.06	7.06	7.15	7.12	7.17	7.07	7.4	16	23	7	1	0	-0.06	C16H23NO7	CHNO
340.177	0	6.74	6.88	6.76	6.95	0	0	7.15	17	27	6	1	0	-0.13	C17H27NO6	CHNO
341.051	0	0	0	0	0	7.2	6.87	0	14	14	10	0	0	-0.09	C14H14O10	CHO
341.055	0	0	0	7.2	0	7.38	7.11	0	11	18	10	0	1	-0.01	C11H18O10S	CHOS
341.084	0	0	0	6.72	0	0	0	0	10	18	11	2	0	0.06	C10H18N2O11	CHNO
341.088	0	6.96	0	7.52	7.05	7.93	7.82	7.51	15	18	9	0	0	0.12	C15H18O9	CHO
341.091	0	6.77	0	7.57	0	7.35	7.12	6.79	12	22	9	0	1	0.06	C12H22O9S	CHOS
341.093	6.72	0	0	0	0	0	0	0	21	14	3	2	0	0.23	C21H14N2O3	CHNO
341.099	0	0	0	0	0	7.11	6.86	6.92	14	18	8	2	0	0.01	C14H18N2O8	CHNO
341.124	7.11	7.6	7.52	7.95	7.58	8.08	8.02	8.01	16	22	8	0	0	0	C16H22O8	CHO
341.135	0	0	6.76	6.73	0	6.85	0	7.08	15	22	7	2	0	-0.05	C15H22N2O7	CHNO
341.161	7.32	7.69	7.82	8.13	7.7	7.75	7.67	8.13	17	26	7	0	0	-0.09	C17H26O7	CHO
341.172	0	0	0	0	0	0	0	6.8	16	26	6	2	0	-0.03	C16H26N2O6	CHNO
341.197	7.06	7.31	7.43	7.97	7.39	7.18	7.25	7.76	18	30	6	0	0	0	C18H30O6	CHO
341.233	0	0	0	7.05	0	6.68	6.98	6.94	19	34	5	0	0	-0.17	C19H34O5	CHO
341.27	7.05	6.74	0	6.71	0	7.08	7.49	6.98	20	38	4	0	0	-0.23	C20H38O4	CHO
342.05	7.28	7.85	7.31	8.02	7.86	7.44	7.43	7.5	10	17	10	1	1	-0.19	C10H17NO10S	CHNOS
342.083	0	6.7	0	7.57	6.8	7.43	7.24	7.11	14	17	9	1	0	0.01	C14H17NO9	CHNO
342.119	0	6.97	6.91	7.46	7.09	7.46	7.33	7.36	15	21	8	1	0	-0.07	C15H21NO8	CHNO
342.156	0	6.91	6.93	6.99	7	6.95	6.92	7.29	16	25	7	1	0	-0.18	C16H25NO7	CHNO
342.229	0	0	0	0	0	0	0	0	18	33	5	1	0	0.05	C18H33NO5	CHNO
343.067	0	0	0	6.94	0	7.59	7.47	6.94	14	16	10	0	0	0.16	C14H16O10	CHO
343.07	0	0	0	6.8	0	6.76	0	0	11	20	10	0	1	-0.08	C11H20O10S	CHOS
343.078	0	0	0	0	0	6.78	0	0	13	16	9	2	0	0.01	C13H16N2O9	CHNO
343.099	0	0	0	6.7	0	0	0	0	10	20	11	2	0	-0.1	C10H20N2O11	CHNO
343.103	0	7.3	7.17	7.78	7.28	8.21	8.15	7.78	15	20	9	0	0	-0.03	C15H20O9	CHO
343.115	0	0	0	0	0	6.88	0	6.87	14	20	8	2	0	0.15	C14H20N2O8	CHNO
343.14	7.25	7.69	7.68	7.94	7.56	8.02	8.01	8.04	16	24	8	0	0	-0.01	C16H24O8	CHO
343.151	0	0	0	0	0	0	0	6.78	15	24	7	2	0	0.13	C15H24N2O7	CHNO
343.176	7.11	7.42	7.56	7.85	7.35	7.38	7.32	7.88	17	28	7	0	0	0.02	C17H28O7	CHO
344.062	0	0	0	0	0	6.95	6.82	0	13	15	10	1	0	-0.04	C13H15NO10	CHNO
344.066	7.31	7.17	0	7.5	7.02	7.01	7.03	6.69	10	19	10	1	1	-0.06	C10H19NO10S	CHNOS
344.099	0	6.77	0	7.37	6.77	7.52	7.28	7.17	14	19	9	1	0	-0.02	C14H19NO9	CHNO
344.135	6.91	6.95	6.99	7.69	7.17	7.25	7.14	7.4	15	23	8	1	0	-0.03	C15H23NO8	CHNO
344.171	0	0	0	6.82	0	0	0	6.9	16	27	7	1	0	-0.15	C16H27NO7	CHNO
345.046	0	0	0	0	0	6.9	0	0	13	14	11	0	0	0.3	C13H14O11	CHO
345.083	0	6.74	0	7.23	0	7.99	7.84	7.26	14	18	10	0	0	0.03	C14H18O10	CHO
345.094	0	0	0	0	0	6.68	0	0	13	18	9	2	0	0.27	C13H18N2O9	CHNO
345.098	0	0	0	6.73	0	6.73	6.69	6.73	18	18	7	0	0	0.07	C18H18O7	CHO
345.119	6.97	7.53	7.44	7.88	7.39	8.22	8.19	7.98	15	22	9	0	0	-0.02	C15H22O9	CHO
345.13	0	0	0	0	0	0	0	6.81	14	22	8	2	0	0.12	C14H22N2O8	CHNO
345.134	0	0	0	7	6.72	0	0	6.97	19	22	6	0	0	-0.03	C19H22O6	CHO
345.156	7.21	7.49	7.6	7.77	7.34	7.65	7.61	7.9	16	26	8	0	0	0.07	C16H26O8	CHO
345.171	0	0	0	7.01	0	0	0	6.83	20	26	5	0	0	-0.01	C20H26O5	CHO
345.192	6.82	6.9	7.01	7.34	6.89	6.96	7.02	7.39	17	30	7	0	0	-0.12	C17H30O7	CHO
345.203	0	0	6.85	7.42	0	0	0	0	16	30	6	2	0	-0.09	C16H30N2O6	CHNO
345.228	0	0	6.73	7.23	6.89	0	0	6.96	18	34	6	0	0	-0.09	C18H34O6	CHO
346.078	0	0	0	7.03	0	7.16	6.97	6.69	13	17	10	1	0	0.04	C13H17NO10	CHNO
346.093	0	0	0	0	0	6.68	0	0	17	17	7	1	0	-0.23	C17H17NO7	CHNO
346.114	0	6.87	6.73	7.54	6.84	7.33	7.23	7.19	14	21	9	1	0	-0.03	C14H21NO9	CHNO
346.13	0	6.8	0	7.15	6.69	0	0	6.91	18	21	6	1	0	0.02	C18H21NO6	CHNO
346.151	6.82	6.83	6.8	7.58	7.06	6.91	6.92	7.27	15	25	8	1	0	-0.19	C15H25NO8	CHNO
346.166	0	0	0	0	0	0	0	6.81	19	25	5	1	0	-0.03	C19H25NO5	CHNO
346.26	0	0	0	7.01	0	0	0	0	18	37	5	1	0	-0.06	C18H37NO5	CHNO
347.062	0	0	0	0	0	7.28	6.9	0	13	16	11	0	0	-0.01	C13H16O11	CHO
347.073	6.78	0	6.71	8.59	6.97	7.27	7.15	7.14	12	16	10	2	0	-0.13	C12H16N2O10	CHNO
347.077	0	0	0	0	0	6.86	6.7	6.8	17	16	8	0	0	0.07	C17H16O8	CHO
347.081	0	0	0	6.92	6.7	6.86	6.81	0	14	20	8	0	1	-0.05	C14H20O8S	CHOS
347.099	0	6.77	0	7.27	6.73	7.98	7.81	7.4	14	20	10	0	0	0.24	C14H20O10	CHO
347.114	0	0	0	7.22	6.86	6.95	6.94	7.15	18	20	7	0	0	0.09	C18H20O7	CHO
347.117	6.83	6.96	0	6.93	6.99	0	0	0	15	24	7	0	1	-0.07	C15H24O7S	CHOS
347.135	6.89	7.42	7.49	7.75	7.27	7.9	7.91	7.89	15	24	9	0	0	-0.03	C15H24O9	CHO
347.171	0	7.03	7.14	7.3	6.89	7.06	7.13	7.43	16	28	8	0	0	0	C16H28O8	CHO
347.186	0	6.75	6.77	7.25	6.8	0	0	7.01	20	28	5	0	0	-0.08	C20H28O5	CHO
347.223	0	0	0	6.82	0	0	0	0	21	32	4	0	0	0.04	C21H32O4	CHO
348.072	0	0	0	0	0	6.81	0	0	16	15	8	1	0	-0.05	C16H15NO8	CHNO
348.094	0	6.71	0	7.31	0	7.12	7.02	6.87	13	19	10	1	0	-0.01	C13H19NO10	CHNO
348.109	0	0	0	6.84	0	6.91	6.78	6.91	17	19	7	1	0	-0.15	C17H19NO7	CHNO
348.13	0	6.75	0	7.53	6.86	6.87	6.93	7.27	14	23	9	1	0	0.1	C14H23NO9	CHNO
348.145	0	6.95	6.94	7.35	6.9	0	0	7.12	18	23	6	1	0	0	C18H23NO6	CHNO
348.166	0	0	0	7.11	0	0	0	0	15	27	8	1	0	-0.06	C15H27NO8	CHNO
348.182	0	0	0	0	6.75	0	0	6.92	19	27	5	1	0	-0.16	C19H27NO5	CHNO
349.06	0	0	0	7.13	0	7.07	6.91	0	13	18	9	0	1	-0.09	C13H18O9S	CHOS
349.078	0	0	0	6.94	0	7.23	7	0	13	18	11	0	0	-0.06	C13H18O11	CHO
349.093	0	6.69	0	7.27	6.83	7.23	7.1	7.15	17	18	8	0	0	0.05	C17H18O8	CHO
349.096	6.87	6.96	6.68	7.36	6.97	7.24	7.12	6.77	14	22	8	0	1	-0.01	C14H22O8S	CHOS
349.104	0	0	0	0	0	6.78	6.73	6.79	16	18	7	2	0	-0.16	C16H18N2O7	CHNO
349.114	0	0	6.78	7.15	0	7.64	7.53	7.29	14	22	10	0	0	-0.07	C14H22O10	CHO
349.129	0	7.02	6.87	7.61	7.12	7.25	7.13	7.42	18	22	7	0	0	0.05	C18H22O7	CHO
349.133	6.92	6.93	6.86	6.96	6.91	0	0	6.7	15	26	7	0	1	0	C15H26O7S	CHOS
349.141	0	0	0	0	0	0	0	6.85	17	22	6	2	0	0.18	C17H22N2O6	CHNO
349.15	0	7.15	7.3	7.38	6.83	7.17	7.14	7.54	15	26	9	0	0	0.02	C15H26O9	CHO
349.166	6.83	7.11	7.11	7.59	7.23	7.09	6.99	7.51	19	26	6	0	0	-0.06	C19H26O6	CHO
349.177	0	0	6.74	0	0	0	0	6.71	18	26	5	2	0	-0.09	C18H26N2O5	CHNO
349.202	6.77	6.95	7.01	7.99	7.08	0	0	7.27	20	30	5	0	0	0.02	C20H30O5	CHO
349.238	0	0	0	6.72	0	0	0	0	21	34	4	0	0	-0.03	C21H34O4	CHO
350.073	0	0	0	6.91	0	6.77	0	0	12	17	11	1	0	0.14	C12H17NO11	CHNO
350.088	0	0	0	6.73	0	7.09	7	6.9	16	17	8	1	0	0.07	C16H17NO8	CHNO
350.109	0	6.71	0	7.43	6.76	6.89	6.91	7.17	13	21	10	1	0	-0.01	C13H21NO10	CHNO
350.125	0	6.84	6.78	7.06	6.91	7.15	7.04	7.24	17	21	7	1	0	-0.03	C17H21NO7	CHNO
350.146	0	0	0	7.25	0	0	0	6.94	14	25	9	1	0	0.07	C14H25NO9	CHNO
350.161	6.77	6.91	7	7.11	7.09	0	0	7.26	18	25	6	1	0	-0.13	C18H25NO6	CHNO
350.197	6.74	6.77	7.02	0	7.14	0	0	7.08	19	29	5	1	0	-0.05	C19H29NO5	CHNO
351.012	7.2	0	7.91	8.72	0	0	0	0	22	8	3	0	1	0.11	C22H8O3S	CHOS
351.039	0	0	0	0	0	7.13	6.84	0	12	16	10	0	1	-0.03	C12H16O10S	CHOS
351.072	0	0	0	6.92	6.74	7.24	7.22	7.08	16	16	9	0	0	-0.09	C16H16O9	CHO
351.076	6.84	6.92	0	7.58	7.03	7.65	7.5	6.87	13	20	9	0	1	-0.06	C13H20O9S	CHOS
351.093	0	0	0	0	0	6.91	0	0	13	20	11	0	0	-0.14	C13H20O11	CHO
351.109	0	7.1	6.97	7.79	7.23	7.59	7.46	7.53	17	20	8	0	0	0.03	C17H20O8	CHO
351.112	7.08	7.17	6.73	7.39	7.06	7.32	7.21	6.94	14	24	8	0	1	0	C14H24O8S	CHOS
351.12	0	0	0	0	0	6.97	6.79	6.94	16	20	7	2	0	-0.09	C16H20N2O7	CHNO
351.13	0	0	0	6.84	0	7.04	6.74	6.96	14	24	10	0	0	0.05	C14H24O10	CHO
351.156	0	0	6.83	0	6.75	0	0	7.08	17	24	6	2	0	0	C17H24N2O6	CHNO
351.166	0	0	0	6.76	0	0	0	6.7	15	28	9	0	0	0.13	C15H28O9	CHO
351.181	7.03	7.38	7.51	7.9	7.6	7.14	7.08	7.87	19	28	6	0	0	-0.11	C19H28O6	CHO
351.218	6.7	6.76	6.91	7.61	7.07	0	0	7.27	20	32	5	0	0	-0.01	C20H32O5	CHO
352.067	0	0	0	0	0	7.03	6.77	6.75	15	15	9	1	0	0.12	C15H15NO9	CHNO
352.071	0	6.77	0	0	6.73	6.69	0	0	12	19	9	1	1	-0.07	C12H19NO9S	CHNOS
352.089	0	0	0	7.24	0	0	0	6.75	12	19	11	1	0	0.04	C12H19NO11	CHNO
352.104	0	6.75	0	7.22	6.88	7.31	7.29	7.27	16	19	8	1	0	0.1	C16H19NO8	CHNO
352.14	6.82	7.16	7.05	7.42	7.27	7.19	7.16	7.54	17	23	7	1	0	-0.03	C17H23NO7	CHNO
352.161	0	0	0	6.91	0	0	0	0	14	27	9	1	0	-0.05	C14H27NO9	CHNO
352.177	6.91	7.01	7.07	6.88	7.15	6.71	0	7.33	18	27	6	1	0	0.07	C18H27NO6	CHNO
352.213	0	0	0	0	6.83	0	0	6.69	19	31	5	1	0	-0.01	C19H31NO5	CHNO
353.051	0	0	0	0	0	7.02	6.84	6.72	15	14	10	0	0	-0.24	C15H14O10	CHO
353.055	0	6.77	0	7.53	0	7.73	7.46	0	12	18	10	0	1	-0.13	C12H18O10S	CHOS
353.063	0	0	0	0	0	6.77	0	0	14	14	9	2	0	0.06	C14H14N2O9	CHNO
353.084	0	0	0	6.74	0	0	0	0	11	18	11	2	0	-0.08	C11H18N2O11	CHNO
353.088	0	6.86	0	7.38	7	7.76	7.6	7.45	16	18	9	0	0	0.07	C16H18O9	CHO
353.091	7.03	7.19	6.82	7.73	7	7.76	7.58	7.19	13	22	9	0	1	-0.02	C13H22O9S	CHOS
353.093	6.76	0	0	0	0	0	0	0	22	14	3	2	0	-0.02	C22H14N2O3	CHNO
353.099	0	0	0	6.93	0	7.19	6.94	7.03	15	18	8	2	0	-0.08	C15H18N2O8	CHNO
353.128	6.92	6.73	0	7.03	6.71	7.02	7.03	0	14	26	8	0	1	-0.01	C14H26O8S	CHOS
353.135	0	6.78	6.8	6.95	6.78	6.96	6.69	7.24	16	22	7	2	0	0.02	C16H22N2O7	CHNO
353.161	7.25	7.68	7.72	8.1	7.75	7.72	7.67	8.1	18	26	7	0	0	-0.1	C18H26O7	CHO
353.172	0	0	6.81	0	6.78	0	0	6.95	17	26	6	2	0	-0.15	C17H26N2O6	CHNO
353.197	7.12	7.36	7.65	8.12	7.64	7.14	7.06	8.03	19	30	6	0	0	-0.09	C19H30O6	CHO
353.233	6.77	6.73	6.83	7.59	7.07	0	6.99	7.26	20	34	5	0	0	-0.18	C20H34O5	CHO
353.27	0	0	0	6.71	0	0	0	0	21	38	4	0	0	0.07	C21H38O4	CHO
353.306	0	0	0	0	0	0	0	6.85	22	42	3	0	0	0.08	C22H42O3	CHO
353.342	6.94	0	0	0	0	0	0	7.08	23	46	2	0	0	-0.12	C23H46O2	CHO
354.05	0	0	0	6.73	0	0	6.68	0	11	17	10	1	1	0.1	C11H17NO10S	CHNOS
354.083	0	0	0	7.02	6.68	7.47	7.28	7.07	15	17	9	1	0	-0.13	C15H17NO9	CHNO
354.086	0	6.7	0	0	6.68	0	0	0	12	21	9	1	1	0.05	C12H21NO9S	CHNOS
354.119	6.96	7.09	7	8.12	7.38	7.57	7.47	7.64	16	21	8	1	0	0.05	C16H21NO8	CHNO
354.156	6.84	7.11	7.23	7.25	7.25	7.19	7.09	7.5	17	25	7	1	0	-0.12	C17H25NO7	CHNO
354.192	0	6.89	6.94	7.02	7.13	0	0	7.13	18	29	6	1	0	0.04	C18H29NO6	CHNO
355.034	0	0	0	6.93	0	0	0	0	11	16	11	0	1	-0.14	C11H16O11S	CHOS
355.067	0	0	0	6.95	0	7.63	7.46	7.08	15	16	10	0	0	0.09	C15H16O10	CHO
355.07	0	6.82	0	7.8	6.69	7.8	7.54	7.16	12	20	10	0	1	0.08	C12H20O10S	CHOS
355.078	0	0	0	0	0	6.94	6.8	6.87	14	16	9	2	0	0	C14H16N2O9	CHNO
355.099	0	0	0	6.83	0	0	0	0	11	20	11	2	0	0.11	C11H20N2O11	CHNO
355.103	6.74	7.31	7.06	7.76	7.35	8.19	8.08	7.82	16	20	9	0	0	0.13	C16H20O9	CHO
355.107	6.7	0	0	7.57	0	7.29	7.21	7.02	13	24	9	0	1	0.02	C13H24O9S	CHOS
355.115	0	0	6.77	6.76	0	7.23	6.95	7.18	15	20	8	2	0	0.07	C15H20N2O8	CHNO
355.151	0	6.74	6.89	6.8	6.8	6.8	6.7	7.2	16	24	7	2	0	-0.03	C16H24N2O7	CHNO
355.176	7.36	7.73	7.92	8.25	7.82	7.71	7.61	8.24	18	28	7	0	0	-0.01	C18H28O7	CHO
355.187	0	0	0	0	0	0	0	6.71	17	28	6	2	0	-0.3	C17H28N2O6	CHNO
355.213	6.98	7.05	7.31	7.87	7.28	7.1	7.19	7.68	19	32	6	0	0	-0.13	C19H32O6	CHO
355.249	6.79	6.75	0	7.14	6.8	0	6.89	7.05	20	36	5	0	0	-0.16	C20H36O5	CHO
355.285	6.94	6.81	0	0	0	7.13	7.38	6.96	21	40	4	0	0	-0.03	C21H40O4	CHO
355.322	0	0	0	0	0	0	0	6.79	22	44	3	0	0	-0.2	C22H44O3	CHO
356.029	0	6.86	0	7.35	6.91	6.84	6.71	0	10	15	11	1	1	-0.04	C10H15NO11S	CHNOS
356.062	0	0	0	0	0	7.22	7.03	6.79	14	15	10	1	0	-0.04	C14H15NO10	CHNO
356.066	6.93	6.88	0	6.92	0	6.83	0	0	11	19	10	1	1	-0.16	C11H19NO10S	CHNOS
356.099	0	6.81	6.7	7.75	7.06	7.7	7.52	7.37	15	19	9	1	0	0.07	C15H19NO9	CHNO
356.135	6.73	7.1	7.02	7.53	7.21	7.56	7.46	7.56	16	23	8	1	0	-0.1	C16H23NO8	CHNO
356.171	0	6.94	7.08	7.13	7.05	6.88	6.83	7.34	17	27	7	1	0	-0.05	C17H27NO7	CHNO
356.281	0	6.79	0	6.71	0	0	0	0	20	39	4	1	0	0.03	C20H39NO4	CHNO
357.046	0	0	0	0	0	7.1	6.77	0	14	14	11	0	0	-0.01	C14H14O11	CHO
357.05	0	0	0	7.16	0	7.21	6.89	0	11	18	11	0	1	-0.06	C11H18O11S	CHOS
357.079	0	0	0	6.73	0	0	0	0	10	18	12	2	0	-0.01	C10H18N2O12	CHNO
357.083	0	0	0	7.39	6.93	8.03	7.85	7.37	15	18	10	0	0	0.05	C15H18O10	CHO
357.086	0	0	0	7.38	0	7.21	6.9	0	12	22	10	0	1	0.04	C12H22O10S	CHOS
357.088	6.79	0	0	0	0	0	0	0	21	14	4	2	0	0.04	C21H14N2O4	CHNO
357.091	0	6.85	0	0	0	0	0	0	18	18	4	2	1	-0.31	C18H18N2O4S	CHNOS
357.094	0	0	0	0	0	7.01	6.83	6.9	14	18	9	2	0	0.06	C14H18N2O9	CHNO
357.098	0	0	0	6.79	0	0	0	0	19	18	7	0	0	0.04	C19H18O7	CHO
357.13	0	0	6.89	6.84	0	7.07	6.78	7.19	15	22	8	2	0	-0.13	C15H22N2O8	CHNO
357.134	0	0	0	6.85	0	0	0	6.77	20	22	6	0	0	-0.05	C20H22O6	CHO
357.156	7.42	7.84	8.01	8.16	7.82	7.99	7.92	8.26	17	26	8	0	0	0.03	C17H26O8	CHO
357.167	0	0	0	0	0	0	0	6.83	16	26	7	2	0	-0.04	C16H26N2O7	CHNO
357.192	7.21	7.42	7.71	8.03	7.55	7.41	7.4	7.97	18	30	7	0	0	-0.08	C18H30O7	CHO
357.228	6.85	6.84	0	7.33	6.71	7.19	7.64	7.22	19	34	6	0	0	0.13	C19H34O6	CHO
357.265	0	0	0	6.87	0	0	0	0	20	38	5	0	0	-0.02	C20H38O5	CHO
358.045	6.81	7.18	0	7.68	7.18	7.12	7.03	6.78	10	17	11	1	1	0.12	C10H17NO11S	CHNOS
358.078	0	0	0	7.1	0	7.41	7.16	6.85	14	17	10	1	0	-0.02	C14H17NO10	CHNO
358.114	6.81	7.02	6.83	7.68	7.1	7.61	7.55	7.38	15	21	9	1	0	0.09	C15H21NO9	CHNO
358.151	0	6.94	6.94	7.41	7.01	7.28	7.21	7.39	16	25	8	1	0	-0.03	C16H25NO8	CHNO
358.166	0	0	0	0	0	0	0	6.7	20	25	5	1	0	0.28	C20H25NO5	CHNO
358.187	0	0	0	6.7	0	0	0	6.93	17	29	7	1	0	0.08	C17H29NO7	CHNO
358.223	0	0	0	0	0	0	0	0	18	33	6	1	0	-0.17	C18H33NO6	CHNO
359.059	7.09	6.78	0	0	0	0	0	0	18	16	6	0	1	-0.32	C18H16O6S	CHOS
359.062	0	0	0	6.69	0	7.48	7.24	6.77	14	16	11	0	0	0.11	C14H16O11	CHO
359.098	0	7.09	6.94	7.6	7.17	8.3	8.14	7.68	15	20	10	0	0	-0.12	C15H20O10	CHO
359.11	0	0	0	6.75	0	6.92	0	6.93	14	20	9	2	0	-0.13	C14H20N2O9	CHNO
359.114	0	0	0	7.07	6.76	6.72	6.68	6.97	19	20	7	0	0	-0.16	C19H20O7	CHO
359.135	7.16	7.62	7.68	7.88	7.54	8.15	8.16	8.08	16	24	9	0	0	0.04	C16H24O9	CHO
359.146	0	0	0	6.75	0	0	0	6.99	15	24	8	2	0	0.05	C15H24N2O8	CHNO
359.15	0	0	0	7.09	0	0	0	7	20	24	6	0	0	-0.09	C20H24O6	CHO
359.171	7.2	7.5	7.76	7.95	7.51	7.6	7.57	7.99	17	28	8	0	0	-0.18	C17H28O8	CHO
359.186	0	0	0	6.98	0	0	0	0	21	28	5	0	0	0.05	C21H28O5	CHO
359.208	6.89	6.93	7.03	7.53	7.13	7.02	7.1	7.41	18	32	7	0	0	-0.04	C18H32O7	CHO
360.061	0	0	0	7.38	6.73	6.9	0	0	10	19	11	1	1	-0.15	C10H19NO11S	CHNOS
360.094	0	0	0	7.29	6.78	7.31	7.14	6.9	14	19	10	1	0	0.03	C14H19NO10	CHNO
360.109	0	0	0	6.78	0	6.69	0	0	18	19	7	1	0	-0.11	C18H19NO7	CHNO
360.13	6.8	6.88	6.87	8.03	7.3	7.31	7.21	7.38	15	23	9	1	0	-0.18	C15H23NO9	CHNO
360.145	0	0	0	6.83	6.68	0	0	6.8	19	23	6	1	0	0	C19H23NO6	CHNO
360.166	0	0	0	7.17	6.71	6.71	0	7.04	16	27	8	1	0	0.11	C16H27NO8	CHNO
360.182	0	0	0	0	0	0	0	6.73	20	27	5	1	0	0.15	C20H27NO5	CHNO
360.239	0	0	0	0	0	0	0	0	18	35	6	1	0	-0.12	C18H35NO6	CHNO
361.078	0	0	0	6.72	0	7.54	7.3	6.79	14	18	11	0	0	0.16	C14H18O11	CHO
361.089	0	0	0	6.69	0	0	0	0	13	18	10	2	0	0.03	C13H18N2O10	CHNO
361.093	0	0	0	6.97	6.68	6.78	6.87	6.86	18	18	8	0	0	-0.02	C18H18O8	CHO
361.096	0	6.74	0	7.05	6.83	6.74	0	0	15	22	8	0	1	0.02	C15H22O8S	CHOS
361.114	0	7.06	6.95	7.49	6.99	7.95	7.87	7.61	15	22	10	0	0	0.01	C15H22O10	CHO
361.14	0	0	0	0	0	0	0	6.74	18	22	6	2	0	-0.02	C18H22N2O6	CHNO
361.15	6.97	7.34	7.52	7.62	7.24	7.58	7.55	7.74	16	26	9	0	0	0.02	C16H26O9	CHO
361.187	0	6.82	7.03	7.23	0	6.88	6.71	7.23	17	30	8	0	0	0	C17H30O8	CHO
361.202	0	0	0	6.95	0	0	0	0	21	30	5	0	0	0.01	C21H30O5	CHO
361.223	0	0	0	6.82	0	0	0	0	18	34	7	0	0	0.01	C18H34O7	CHO
362.073	0	0	0	0	0	6.75	0	0	13	17	11	1	0	-0.25	C13H17NO11	CHNO
362.088	0	0	0	0	0	0	0	6.71	17	17	8	1	0	0.09	C17H17NO8	CHNO
362.109	0	0	0	7.41	6.81	7.1	7	6.97	14	21	10	1	0	0.09	C14H21NO10	CHNO
362.125	0	0	0	6.97	0	0	6.69	6.95	18	21	7	1	0	-0.01	C18H21NO7	CHNO
362.146	6.72	6.72	6.71	7.58	6.93	6.71	6.81	7.2	15	25	9	1	0	-0.12	C15H25NO9	CHNO
362.161	0	6.7	0	6.81	6.75	0	0	6.93	19	25	6	1	0	-0.07	C19H25NO6	CHNO
362.197	0	0	0	0	6.68	0	0	0	20	29	5	1	0	-0.08	C20H29NO5	CHNO
363.072	0	0	0	6.71	0	6.86	6.77	6.79	17	16	9	0	0	-0.07	C17H16O9	CHO
363.075	0	0	0	7.16	0	7.05	6.97	0	14	20	9	0	1	-0.16	C14H20O9S	CHOS
363.093	0	0	0	0	0	7.43	7.24	6.75	14	20	11	0	0	0.18	C14H20O11	CHO
363.109	0	6.73	0	7.29	6.85	7.16	7.07	7.15	18	20	8	0	0	0.06	C18H20O8	CHO
363.112	6.98	7.08	6.74	7.29	7.02	7.04	6.93	6.93	15	24	8	0	1	-0.11	C15H24O8S	CHOS
363.12	0	0	0	0	0	0	0	6.75	17	20	7	2	0	-0.01	C17H20N2O7	CHNO
363.13	0	6.78	6.87	7.26	6.75	7.53	7.39	7.35	15	24	10	0	0	-0.14	C15H24O10	CHO
363.145	0	6.92	6.82	7.52	7.1	7.06	7.03	7.29	19	24	7	0	0	-0.11	C19H24O7	CHO
363.156	0	0	0	0	0	0	0	6.73	18	24	6	2	0	0.2	C18H24N2O6	CHNO
363.166	0	0	6.85	7.04	0	6.84	6.83	7.15	16	28	9	0	0	0.01	C16H28O9	CHO
363.181	0	6.93	6.91	7.44	7.04	6.83	0	7.25	20	28	6	0	0	-0.1	C20H28O6	CHO
363.218	0	0	0	6.91	0	0	0	0	21	32	5	0	0	0.05	C21H32O5	CHO
364.034	0	0	0	6.87	0	0	0	0	12	15	10	1	1	0.05	C12H15NO10S	CHNOS
364.089	0	0	0	6.94	0	6.77	6.76	6.71	13	19	11	1	0	0.1	C13H19NO11	CHNO
364.104	0	0	0	6.74	0	6.96	6.88	6.94	17	19	8	1	0	0.03	C17H19NO8	CHNO
364.125	0	0	0	7.34	6.81	6.72	6.75	7.08	14	23	10	1	0	-0.1	C14H23NO10	CHNO
364.14	0	6.84	6.84	7.09	6.77	6.84	6.7	7.06	18	23	7	1	0	-0.04	C18H23NO7	CHNO
364.161	0	0	0	7.22	0	0	0	6.76	15	27	9	1	0	0.2	C15H27NO9	CHNO
364.177	0	6.77	6.79	6.72	6.94	0	0	6.98	19	27	6	1	0	-0.03	C19H27NO6	CHNO
364.213	6.7	6.77	6.75	0	7.01	0	0	6.9	20	31	5	1	0	0	C20H31NO5	CHNO
365.055	0	0	0	7	0	7.06	6.87	0	13	18	10	0	1	-0.1	C13H18O10S	CHOS
365.088	0	0	0	7.02	0	7.18	7.06	7.02	17	18	9	0	0	0.08	C17H18O9	CHO
365.091	6.85	6.92	0	7.42	6.9	7.41	7.25	6.84	14	22	9	0	1	0	C14H22O9S	CHOS
365.109	0	0	0	0	0	7.03	6.89	0	14	22	11	0	0	-0.04	C14H22O11	CHO
365.128	6.98	7.02	6.7	7.37	6.99	7.05	6.93	6.91	15	26	8	0	1	-0.07	C15H26O8S	CHOS
365.135	0	0	0	0	0	0	0	6.85	17	22	7	2	0	0.04	C17H22N2O7	CHNO
365.145	0	0	6.7	6.89	0	6.74	6.79	7.02	15	26	10	0	0	0.11	C15H26O10	CHO
365.155	0	0	0	6.95	0	0	0	0	26	22	2	0	0	-0.02	C26H22O2	CHO
365.172	0	0	0	0	6.68	0	0	6.85	18	26	6	2	0	0.05	C18H26N2O6	CHNO
365.197	6.75	7.05	7.13	7.82	7.17	6.81	0	7.48	20	30	6	0	0	-0.08	C20H30O6	CHO
365.233	0	0	0	6.94	0	0	0	0	21	34	5	0	0	0.1	C21H34O5	CHO
366.083	0	0	0	0	0	6.98	6.86	6.79	16	17	9	1	0	-0.02	C16H17NO9	CHNO
366.104	0	0	0	6.92	0	0	0	6.82	13	21	11	1	0	0.12	C13H21NO11	CHNO
366.119	0	6.85	0	7.53	6.99	7.16	6.98	7.21	17	21	8	1	0	0.05	C17H21NO8	CHNO
366.141	0	0	0	7.08	0	0	0	6.83	14	25	10	1	0	-0.01	C14H25NO10	CHNO
366.156	6.71	6.94	6.89	6.95	6.97	6.87	6.9	7.25	18	25	7	1	0	0.02	C18H25NO7	CHNO
366.192	0	6.83	7.12	6.71	7.15	0	0	7.17	19	29	6	1	0	-0.09	C19H29NO6	CHNO
367.07	0	6.83	0	7.36	0	7.55	7.35	6.74	13	20	10	0	1	0.16	C13H20O10S	CHOS
367.076	6.89	6.81	0	0	0	0	0	0	19	16	4	2	1	-0.29	C19H16N2O4S	CHNOS
367.099	0	0	0	6.72	0	0	0	0	12	20	11	2	0	-0.1	C12H20N2O11	CHNO
367.103	0	6.96	0	7.4	7.05	7.63	7.54	7.44	17	20	9	0	0	-0.03	C17H20O9	CHO
367.107	7	7.22	6.84	7.59	6.91	7.42	7.37	7.18	14	24	9	0	1	-0.07	C14H24O9S	CHOS
367.115	0	0	0	0	0	6.96	6.71	6.92	16	20	8	2	0	-0.02	C16H20N2O8	CHNO
367.143	0	0	0	6.77	0	0	6.79	0	15	28	8	0	1	0.08	C15H28O8S	CHOS
367.151	0	0	0	0	6.68	6.84	0	7.07	17	24	7	2	0	0	C17H24N2O7	CHNO
367.17	0	0	0	6.93	0	0	0	0	26	24	2	0	0	-0.02	C26H24O2	CHO
367.176	7.06	7.46	7.59	7.91	7.51	7.4	7.31	7.92	19	28	7	0	0	-0.17	C19H28O7	CHO
367.188	0	0	0	0	0	0	0	6.78	18	28	6	2	0	0.15	C18H28N2O6	CHNO
367.213	6.75	6.95	7.13	7.77	7.14	6.76	0	7.47	20	32	6	0	0	-0.1	C20H32O6	CHO
367.249	0	0	0	6.92	0	0	0	0	21	36	5	0	0	0.03	C21H36O5	CHO
368.062	0	0	0	0	0	6.95	0	0	15	15	10	1	0	0.15	C15H15NO10	CHNO
368.099	0	0	0	7.22	0	7.37	7.24	7	16	19	9	1	0	-0.01	C16H19NO9	CHNO
368.12	0	0	0	6.74	0	0	0	0	13	23	11	1	0	0.08	C13H23NO11	CHNO
368.135	6.91	7.15	7.01	7.85	7.32	7.3	7.26	7.55	17	23	8	1	0	-0.09	C17H23NO8	CHNO
368.171	6.75	7.02	7.06	7.06	7.14	6.84	6.73	7.28	18	27	7	1	0	-0.1	C18H27NO7	CHNO
368.208	0	0	0	0	6.75	0	0	6.94	19	31	6	1	0	0.01	C19H31NO6	CHNO
369.05	0	0	0	6.89	0	7.2	6.81	0	12	18	11	0	1	0.08	C12H18O11S	CHOS
369.083	0	0	0	7.04	0	7.7	7.56	7.16	16	18	10	0	0	-0.11	C16H18O10	CHO
369.086	6.91	7.18	6.87	7.6	6.69	7.69	7.53	7.35	13	22	10	0	1	-0.22	C13H22O10S	CHOS
369.094	0	0	0	0	0	7.01	6.75	6.78	15	18	9	2	0	-0.05	C15H18N2O9	CHNO
369.115	0	0	0	6.71	0	0	0	0	12	22	11	2	0	0.13	C12H22N2O11	CHNO
369.122	0	0	0	7.1	0	6.88	6.9	6.85	14	26	9	0	1	0.04	C14H26O9S	CHOS
369.13	0	0	0	0	0	7	6.7	7.08	16	22	8	2	0	0.04	C16H22N2O8	CHNO
369.167	0	0	6.7	0	0	0	0	6.98	17	26	7	2	0	-0.19	C17H26N2O7	CHNO
369.192	7.13	7.49	7.63	7.97	7.52	7.3	7.24	7.96	19	30	7	0	0	0.04	C19H30O7	CHO
369.228	6.78	6.7	6.83	7.5	6.89	6.74	6.91	7.34	20	34	6	0	0	-0.15	C20H34O6	CHO
369.265	0	0	0	6.84	0	0	0	0	21	38	5	0	0	0.17	C21H38O5	CHO
370.078	0	0	0	6.91	0	7.26	7.09	6.8	15	17	10	1	0	-0.01	C15H17NO10	CHNO
370.081	6.72	6.76	0	6.7	0	0	0	0	12	21	10	1	1	-0.08	C12H21NO10S	CHNOS
370.114	0	6.92	6.7	7.58	7.05	7.56	7.45	7.32	16	21	9	1	0	0	C16H21NO9	CHNO
370.151	6.73	7.03	7.1	7.67	7.21	7.25	7.19	7.5	17	25	8	1	0	-0.09	C17H25NO8	CHNO
370.187	0	6.75	6.81	7.1	6.97	6.73	0	7.17	18	29	7	1	0	0.07	C18H29NO7	CHNO
371.062	0	0	0	0	0	7.32	7.16	0	15	16	11	0	0	-0.06	C15H16O11	CHO
371.066	0	0	0	7.21	6.86	7.41	7.06	0	12	20	11	0	1	-0.1	C12H20O11S	CHOS
371.073	0	0	0	0	0	6.77	0	0	14	16	10	2	0	0.17	C14H16N2O10	CHNO
371.098	0	6.94	6.78	7.42	7.04	8.05	7.94	7.53	16	20	10	0	0	0.12	C16H20O10	CHO
371.102	0	0	0	7.49	0	7.09	6.83	6.87	13	24	10	0	1	-0.02	C13H24O10S	CHOS
371.11	0	0	0	0	0	7.14	6.88	6.93	15	20	9	2	0	-0.03	C15H20N2O9	CHNO
371.114	0	0	0	6.72	0	0	0	0	20	20	7	0	0	-0.01	C20H20O7	CHO
371.146	0	0	6.74	6.71	0	6.88	0	7.07	16	24	8	2	0	0.12	C16H24N2O8	CHNO
371.171	7.3	7.74	7.87	8.06	7.68	7.81	7.78	8.17	18	28	8	0	0	0.01	C18H28O8	CHO
371.208	6.91	7.23	7.45	7.74	7.24	7.09	7.1	7.78	19	32	7	0	0	0.01	C19H32O7	CHO
371.244	6.7	0	0	7.16	0	7.07	7.6	7.04	20	36	6	0	0	-0.02	C20H36O6	CHO
372.024	0	0	0	6.98	0	0	0	0	10	15	12	1	1	-0.11	C10H15NO12S	CHNOS
372.057	0	0	0	0	0	6.74	0	0	14	15	11	1	0	-0.08	C14H15NO11	CHNO
372.061	0	0	0	6.86	0	0	0	0	11	19	11	1	1	-0.12	C11H19NO11S	CHNOS
372.094	0	6.7	0	7.31	0	7.49	7.4	7.02	15	19	10	1	0	0.14	C15H19NO10	CHNO
372.13	0	6.98	6.85	7.49	7.01	7.57	7.42	7.43	16	23	9	1	0	0.01	C16H23NO9	CHNO
372.166	0	6.83	6.98	7.38	6.99	7.09	7.08	7.35	17	27	8	1	0	0.01	C17H27NO8	CHNO
372.203	0	0	0	6.84	0	0	0	6.89	18	31	7	1	0	0	C18H31NO7	CHNO
373.056	6.95	7.3	0	6.78	7.41	0	6.91	0	10	18	11	2	1	0.01	C10H18N2O11S	CHNOS
373.089	0	0	0	6.8	0	6.86	0	6.71	14	18	10	2	0	0.2	C14H18N2O10	CHNO
373.093	0	0	0	6.79	0	6.72	0	6.71	19	18	8	0	0	0.2	C19H18O8	CHO
373.125	0	0	0	6.93	0	7.07	6.83	7.04	15	22	9	2	0	0.1	C15H22N2O9	CHNO
373.129	0	0	0	7.1	6.81	6.71	0	6.93	20	22	7	0	0	0.07	C20H22O7	CHO
373.162	0	0	0	6.74	0	0	0	6.88	16	26	8	2	0	0.04	C16H26N2O8	CHNO
373.187	7.14	7.5	7.74	7.9	7.51	7.52	7.47	8	18	30	8	0	0	-0.23	C18H30O8	CHO
373.202	0	0	0	6.95	0	0	0	0	22	30	5	0	0	0.06	C22H30O5	CHO
373.223	0	6.72	6.82	7.26	6.88	6.94	7.19	7.32	19	34	7	0	0	0.07	C19H34O7	CHO
374.04	0	0	0	7.21	0	6.8	0	0	10	17	12	1	1	-0.07	C10H17NO12S	CHNOS
374.073	0	0	0	6.7	0	7.12	6.86	0	14	17	11	1	0	0.06	C14H17NO11	CHNO
374.076	0	0	0	6.97	0	6.74	0	0	11	21	11	1	1	0.07	C11H21NO11S	CHNOS
374.088	0	0	0	0	0	6.79	0	0	18	17	8	1	0	0.1	C18H17NO8	CHNO
374.109	0	6.8	0	7.64	7	7.6	7.52	7.3	15	21	10	1	0	0.09	C15H21NO10	CHNO
374.125	0	0	0	6.75	0	6.74	0	6.92	19	21	7	1	0	-0.07	C19H21NO7	CHNO
374.146	0	0	6.84	7.48	6.98	7.33	7.26	7.33	16	25	9	1	0	-0.01	C16H25NO9	CHNO
374.161	0	0	0	6.94	0	0	0	6.85	20	25	6	1	0	0.07	C20H25NO6	CHNO
374.182	0	0	0	7.06	0	6.72	6.75	6.97	17	29	8	1	0	-0.25	C17H29NO8	CHNO
374.218	0	0	0	6.82	0	0	0	0	18	33	7	1	0	0.18	C18H33NO7	CHNO
375.057	0	0	0	0	0	7.12	6.89	0	14	16	12	0	0	0.07	C14H16O12	CHO
375.076	0	0	0	6.8	0	6.73	0	0	15	20	9	0	1	0.03	C15H20O9S	CHOS
375.093	0	0	0	7.17	6.72	8.07	7.87	7.36	15	20	11	0	0	0.15	C15H20O11	CHO
375.105	0	0	0	6.88	0	6.88	0	6.72	14	20	10	2	0	0.07	C14H20N2O10	CHNO
375.109	0	0	0	7.27	6.86	7.08	6.94	7.1	19	20	8	0	0	0.16	C19H20O8	CHO
375.12	0	0	0	0	0	0	0	6.79	18	20	7	2	0	-0.06	C18H20N2O7	CHNO
375.141	0	0	0	7.1	0	0	0	6.95	15	24	9	2	0	-0.03	C15H24N2O9	CHNO
375.145	0	6.84	6.77	7.54	7.11	7.08	6.94	7.28	20	24	7	0	0	-0.21	C20H24O7	CHO
375.156	0	0	0	0	0	0	0	6.87	19	24	6	2	0	0.08	C19H24N2O6	CHNO
375.166	7.05	7.45	7.68	7.76	7.37	7.71	7.75	7.87	17	28	9	0	0	0	C17H28O9	CHO
375.181	0	0	6.73	7.49	6.93	0	0	7.11	21	28	6	0	0	-0.03	C21H28O6	CHO
375.193	0	0	0	0	0	0	0	6.73	20	28	5	2	0	-0.08	C20H28N2O5	CHNO
375.202	0	6.89	7.12	7.41	7.04	6.94	6.92	7.42	18	32	8	0	0	-0.2	C18H32O8	CHO
375.218	0	0	0	7.07	0	0	0	0	22	32	5	0	0	-0.04	C22H32O5	CHO
375.239	0	0	0	0	0	0	0	6.72	19	36	7	0	0	0.23	C19H36O7	CHO
376.055	0	0	0	6.99	0	0	0	0	10	19	12	1	1	-0.17	C10H19NO12S	CHNOS
376.089	0	0	0	7.14	0	7.19	7.05	6.8	14	19	11	1	0	0.02	C14H19NO11	CHNO
376.104	0	0	0	6.81	0	6.92	6.72	6.87	18	19	8	1	0	-0.18	C18H19NO8	CHNO
376.125	6.8	6.99	6.82	7.86	7.24	7.37	7.25	7.39	15	23	10	1	0	0.03	C15H23NO10	CHNO
376.14	0	0	0	7.02	6.88	6.82	6.8	7.11	19	23	7	1	0	-0.03	C19H23NO7	CHNO
376.161	0	0	0	7.39	6.71	6.86	6.76	7.06	16	27	9	1	0	-0.06	C16H27NO9	CHNO
376.177	0	0	6.78	6.93	6.96	0	0	7.05	20	27	6	1	0	-0.11	C20H27NO6	CHNO
376.253	0	0	0	6.77	0	0	0	0	19	39	4	1	1	-0.18	C19H39NO4S	CHNOS
377.051	0	0	0	0	0	6.73	0	0	17	14	10	0	0	-0.22	C17H14O10	CHO
377.055	0	0	0	6.94	0	6.95	6.84	0	14	18	10	0	1	0.03	C14H18O10S	CHOS
377.073	0	0	0	0	0	7.18	7	0	14	18	12	0	0	0.04	C14H18O12	CHO
377.088	0	0	0	6.96	6.73	7.09	6.91	6.96	18	18	9	0	0	0.13	C18H18O9	CHO
377.091	6.82	6.98	0	7.43	7.08	7.22	7.1	6.77	15	22	9	0	1	0.11	C15H22O9S	CHOS
377.109	0	0	0	7.14	0	7.84	7.72	7.26	15	22	11	0	0	0.01	C15H22O11	CHO
377.12	0	0	0	6.97	0	0	0	6.74	14	22	10	2	0	-0.09	C14H22N2O10	CHNO
377.128	0	0	0	7	0	6.73	6.69	0	16	26	8	0	1	-0.13	C16H26O8S	CHOS
377.135	0	0	0	6.99	6.81	6.79	0	6.98	18	22	7	2	0	-0.12	C18H22N2O7	CHNO
377.145	0	6.94	7.24	7.41	6.98	7.58	7.44	7.58	16	26	10	0	0	0.03	C16H26O10	CHO
377.157	0	0	0	6.81	0	0	0	0	15	26	9	2	0	0.09	C15H26N2O9	CHNO
377.161	0	7.09	7.05	7.76	7.31	7.16	6.96	7.5	20	26	7	0	0	-0.05	C20H26O7	CHO
377.172	0	0	6.75	0	6.75	0	0	6.98	19	26	6	2	0	-0.11	C19H26N2O6	CHNO
377.182	0	0	7.1	7.2	6.72	6.8	6.79	7.29	17	30	9	0	0	-0.07	C17H30O9	CHO
377.197	0	6.74	6.95	7.48	7.03	6.81	0	7.19	21	30	6	0	0	-0.15	C21H30O6	CHO
377.233	0	0	0	7.15	0	0	0	0	22	34	5	0	0	0.03	C22H34O5	CHO
378.071	0	0	0	7.18	0	0	0	0	10	21	12	1	1	-0.15	C10H21NO12S	CHNOS
378.083	0	0	0	0	0	6.99	6.91	6.73	17	17	9	1	0	-0.18	C17H17NO9	CHNO
378.104	0	0	0	7.39	6.84	7.12	7.06	7.13	14	21	11	1	0	0.01	C14H21NO11	CHNO
378.119	0	0	0	7.03	6.77	7.08	6.98	7.08	18	21	8	1	0	0.13	C18H21NO8	CHNO
378.123	0	0	0	0	6.79	0	0	0	15	25	8	1	1	0.04	C15H25NO8S	CHNOS
378.141	0	0	6.73	7.73	7.02	6.98	6.9	7.35	15	25	10	1	0	-0.06	C15H25NO10	CHNO
378.177	0	0	0	7	0	0	0	0	16	29	9	1	0	-0.03	C16H29NO9	CHNO
378.192	0	6.77	7.04	6.92	7.14	0	0	7.16	20	29	6	1	0	0.07	C20H29NO6	CHNO
379.067	0	0	0	0	0	7.01	6.82	6.76	17	16	10	0	0	-0.18	C17H16O10	CHO
379.07	0	0	0	7.33	6.74	7.33	7.16	0	14	20	10	0	1	-0.02	C14H20O10S	CHOS
379.088	0	0	0	0	0	7.03	0	0	14	20	12	0	0	0.13	C14H20O12	CHO
379.103	0	0	0	7.39	7.02	7.35	7.28	7.29	18	20	9	0	0	0.09	C18H20O9	CHO
379.107	7.18	7.23	7	7.73	7.3	7.5	7.37	7.13	15	24	9	0	1	-0.02	C15H24O9S	CHOS
379.115	0	0	0	0	0	6.95	6.81	6.92	17	20	8	2	0	0.09	C17H20N2O8	CHNO
379.125	0	0	0	6.88	0	7.28	7.08	7.01	15	24	11	0	0	-0.02	C15H24O11	CHO
379.143	6.8	6.72	0	6.89	0	6.75	6.83	0	16	28	8	0	1	0.01	C16H28O8S	CHOS
379.151	0	0	6.69	6.84	0	6.78	6.76	7.02	18	24	7	2	0	-0.15	C18H24N2O7	CHNO
379.161	0	0	6.7	6.95	0	0	0	6.99	16	28	10	0	0	-0.06	C16H28O10	CHO
379.187	0	0	6.74	0	6.73	0	0	6.89	19	28	6	2	0	-0.07	C19H28N2O6	CHNO
379.213	0	0	6.76	7.48	6.94	0	0	7.14	21	32	6	0	0	-0.15	C21H32O6	CHO
379.249	0	0	0	7.03	0	0	0	0	22	36	5	0	0	0.04	C22H36O5	CHO
380.062	0	0	0	0	0	6.74	0	0	16	15	10	1	0	-0.01	C16H15NO10	CHNO
380.083	0	0	0	6.74	0	0	0	0	13	19	12	1	0	-0.03	C13H19NO12	CHNO
380.099	0	0	0	7.17	0	7.21	7.07	7.05	17	19	9	1	0	0.03	C17H19NO9	CHNO
380.12	0	0	0	7.25	6.8	6.82	6.75	7.04	14	23	11	1	0	-0.11	C14H23NO11	CHNO
380.135	0	6.88	6.79	7.12	7	7.18	7.14	7.28	18	23	8	1	0	-0.03	C18H23NO8	CHNO
380.171	0	6.99	7.14	7.12	7.12	6.83	6.74	7.29	19	27	7	1	0	-0.06	C19H27NO7	CHNO
380.208	6.73	6.73	7.13	6.95	7.23	0	0	7.16	20	31	6	1	0	-0.16	C20H31NO6	CHNO
381.05	0	0	0	6.93	0	7.13	6.94	0	13	18	11	0	1	0.08	C13H18O11S	CHOS
381.079	0	0	0	6.87	0	0	0	0	12	18	12	2	0	0.06	C12H18N2O12	CHNO
381.083	0	0	0	6.91	6.78	7.32	7.2	7.11	17	18	10	0	0	0.03	C17H18O10	CHO
381.086	6.78	7	0	7.59	6.88	7.57	7.43	6.95	14	22	10	0	1	-0.05	C14H22O10S	CHOS
381.093	0	0	0	7.06	0	6.88	0	6.71	16	18	9	2	0	-0.12	C16H18N2O9	CHNO
381.115	0	0	0	7	0	0	0	0	13	22	11	2	0	-0.01	C13H22N2O11	CHNO
381.122	7.11	7.27	7.06	7.84	7.24	7.28	7.28	7.35	15	26	9	0	1	-0.03	C15H26O9S	CHOS
381.13	0	0	0	6.89	0	7.04	6.81	7	17	22	8	2	0	0.09	C17H22N2O8	CHNO
381.159	6.73	0	0	0	0	0	6.72	0	16	30	8	0	1	-0.19	C16H30O8S	CHOS
381.167	0	6.81	6.9	0	6.73	0	0	7.06	18	26	7	2	0	-0.1	C18H26N2O7	CHNO
381.192	7.05	7.25	7.43	8.03	7.5	7.13	7.17	7.74	20	30	7	0	0	-0.13	C20H30O7	CHO
381.228	0	0	0	7.48	0	0	0	7.04	21	34	6	0	0	0.12	C21H34O6	CHO
381.265	0	0	0	6.89	0	0	0	0	22	38	5	0	0	-0.06	C22H38O5	CHO
381.337	0	0	0	0	0	0	0	6.73	24	46	3	0	0	0.03	C24H46O3	CHO
382.078	0	0	0	0	0	7.12	6.92	0	16	17	10	1	0	0.21	C16H17NO10	CHNO
382.081	0	0	0	0	0	6.72	0	0	13	21	10	1	1	0.24	C13H21NO10S	CHNOS
382.114	0	6.93	0	7.71	7.11	7.34	7.27	7.28	17	21	9	1	0	-0.06	C17H21NO9	CHNO
382.151	6.71	7.03	6.99	7.33	7.09	7.17	7.09	7.36	18	25	8	1	0	-0.06	C18H25NO8	CHNO
382.187	7.18	7.15	7.31	7.91	7.69	0	6.73	7.45	19	29	7	1	0	-0.17	C19H29NO7	CHNO
382.224	0	0	0	0	0	0	0	6.77	20	33	6	1	0	0.19	C20H33NO6	CHNO
383.062	0	0	0	0	0	7.05	6.91	0	16	16	11	0	0	0.15	C16H16O11	CHO
383.065	0	0	0	7.22	0	7.4	7.14	0	13	20	11	0	1	0.04	C13H20O11S	CHOS
383.094	0	0	0	7.21	0	7.13	6.84	0	12	20	12	2	0	0.17	C12H20N2O12	CHNO
383.098	0	6.81	0	7.22	6.91	7.66	7.58	7.36	17	20	10	0	0	-0.08	C17H20O10	CHO
383.102	7.01	7.27	7.08	7.67	6.92	7.52	7.39	7.33	14	24	10	0	1	-0.16	C14H24O10S	CHOS
383.11	0	0	0	0	0	7.02	6.77	6.91	16	20	9	2	0	-0.11	C16H20N2O9	CHNO
383.138	0	6.75	6.69	7.21	6.69	0	6.74	6.98	15	28	9	0	1	-0.03	C15H28O9S	CHOS
383.146	0	0	6.78	6.77	0	6.86	0	7.06	17	24	8	2	0	0.04	C17H24N2O8	CHNO
383.182	0	0	6.76	0	0	0	0	6.92	18	28	7	2	0	-0.2	C18H28N2O7	CHNO
383.207	6.95	7.22	7.35	7.94	7.27	7.08	7.04	7.68	20	32	7	0	0	-0.09	C20H32O7	CHO
383.244	0	0	0	7.19	0	0	0	6.93	21	36	6	0	0	0.17	C21H36O6	CHO
383.28	0	0	0	6.73	0	0	0	0	22	40	5	0	0	-0.13	C22H40O5	CHO
384.061	0	0	0	0	0	0	0	0	12	19	11	1	1	-0.02	C12H19NO11S	CHNOS
384.094	0	0	0	7.1	0	7.29	7.09	6.91	16	19	10	1	0	0	C16H19NO10	CHNO
384.13	6.81	7.17	7.2	7.99	7.47	7.41	7.32	7.59	17	23	9	1	0	-0.17	C17H23NO9	CHNO
384.166	0	7.01	6.98	7.3	7.1	6.98	6.86	7.35	18	27	8	1	0	0.03	C18H27NO8	CHNO
384.203	0	0	6.72	6.89	6.83	0	0	7.04	19	31	7	1	0	-0.17	C19H31NO7	CHNO
385.078	0	0	0	0	0	7.46	7.3	6.95	16	18	11	0	0	0.09	C16H18O11	CHO
385.081	0	0	0	7.31	0	7.48	7.21	6.82	13	22	11	0	1	-0.03	C13H22O11S	CHOS
385.114	0	7.14	6.86	7.47	7.09	7.87	7.79	7.56	17	22	10	0	0	-0.01	C17H22O10	CHO
385.117	0	0	0	7.13	0	6.99	6.8	6.91	14	26	10	0	1	-0.11	C14H26O10S	CHOS
385.125	0	0	0	0	0	6.99	6.8	6.91	16	22	9	2	0	0.1	C16H22N2O9	CHNO
385.162	0	0	0	0	0	0	0	6.89	17	26	8	2	0	0.11	C17H26N2O8	CHNO
385.166	0	0	0	6.72	0	0	0	0	22	26	6	0	0	0.03	C22H26O6	CHO
385.187	7.03	7.45	7.66	7.88	7.44	7.36	7.33	7.92	19	30	8	0	0	-0.01	C19H30O8	CHO
385.223	6.71	6.9	6.96	7.47	7.05	6.74	6.92	7.4	20	34	7	0	0	-0.1	C20H34O7	CHO
385.259	0	0	0	6.81	0	0	6.87	0	21	38	6	0	0	-0.21	C21H38O6	CHO
386.04	0	0	0	6.72	0	0	0	0	11	17	12	1	1	0.05	C11H17NO12S	CHNOS
386.109	0	0	0	7.21	0	7.44	7.24	7.05	16	21	10	1	0	-0.04	C16H21NO10	CHNO
386.146	6.93	7.02	6.88	7.75	7.12	7.29	7.12	7.33	17	25	9	1	0	0.01	C17H25NO9	CHNO
386.182	6.71	6.82	6.88	7.26	6.88	6.74	6.73	7.15	18	29	8	1	0	-0.03	C18H29NO8	CHNO
386.197	0	0	0	6.74	0	0	0	0	22	29	5	1	0	0.02	C22H29NO5	CHNO
387.035	0	0	0	0	6.72	0	0	0	10	16	12	2	1	0.05	C10H16N2O12S	CHNOS
387.057	0	0	0	0	0	7.04	6.71	0	15	16	12	0	0	-0.01	C15H16O12	CHO
387.068	0	0	0	6.72	0	0	0	0	14	16	11	2	0	-0.06	C14H16N2O11	CHNO
387.093	0	0	0	6.97	0	7.76	7.62	7.13	16	20	11	0	0	0.23	C16H20O11	CHO
387.097	0	0	0	6.81	0	6.79	0	0	13	24	11	0	1	0.09	C13H24O11S	CHOS
387.105	0	0	0	0	0	6.8	0	6.76	15	20	10	2	0	0.27	C15H20N2O10	CHNO
387.141	0	0	0	0	0	6.7	0	6.86	16	24	9	2	0	-0.04	C16H24N2O9	CHNO
387.142	0	0	0	6.9	0	0	0	0	25	24	2	0	1	0.17	C25H24O2S	CHOS
387.166	7.08	7.56	7.67	7.77	7.44	7.68	7.63	7.93	18	28	9	0	0	0.07	C18H28O9	CHO
387.181	0	0	0	7	0	0	0	0	22	28	6	0	0	0.05	C22H28O6	CHO
387.202	6.86	7.2	7.46	7.57	7.19	7.11	7.1	7.71	19	32	8	0	0	-0.15	C19H32O8	CHO
387.239	0	0	0	7.07	0	0	6.92	6.96	20	36	7	0	0	0.01	C20H36O7	CHO
388.055	0	0	0	6.72	0	0	0	0	11	19	12	1	1	-0.05	C11H19NO12S	CHNOS
388.089	0	0	0	6.88	0	7.23	7.06	0	15	19	11	1	0	0.01	C15H19NO11	CHNO
388.122	6.7	0	0	0	0	0	0	0	20	23	5	1	1	-0.13	C20H23NO5S	CHNOS
388.125	0	6.73	0	7.34	6.77	7.32	7.25	7.13	16	23	10	1	0	0.02	C16H23NO10	CHNO
388.161	0	0	0	7.34	6.9	7.01	6.93	7.2	17	27	9	1	0	-0.06	C17H27NO9	CHNO
388.198	0	0	0	6.92	0	0	0	6.78	18	31	8	1	0	0.07	C18H31NO8	CHNO
389.051	0	6.79	0	0	6.82	0	0	0	10	18	12	2	1	-0.13	C10H18N2O12S	CHNOS
389.073	0	0	0	0	0	7.28	7.17	0	15	18	12	0	0	-0.02	C15H18O12	CHO
389.084	0	0	0	6.73	0	0	0	0	14	18	11	2	0	0.04	C14H18N2O11	CHNO
389.109	0	6.79	0	7.15	6.85	7.9	7.77	7.37	16	22	11	0	0	0.07	C16H22O11	CHO
389.12	0	0	0	7.02	0	6.74	0	6.73	15	22	10	2	0	0.04	C15H22N2O10	CHNO
389.182	6.91	7.26	7.52	7.52	7.16	7.3	7.42	7.65	18	30	9	0	0	0.07	C18H30O9	CHO
389.197	0	6.71	0	7.34	6.78	0	0	6.88	22	30	6	0	0	0.01	C22H30O6	CHO
389.218	0	0	6.81	7.14	0	0	0	7.21	19	34	8	0	0	-0.13	C19H34O8	CHO
390.083	0	0	0	0	0	6.7	0	0	18	17	9	1	0	0.25	C18H17NO9	CHNO
390.104	0	0	0	7.17	6.71	7.24	7.08	6.96	15	21	11	1	0	0.04	C15H21NO11	CHNO
390.119	0	0	0	0	0	6.83	6.76	6.81	19	21	8	1	0	-0.18	C19H21NO8	CHNO
390.141	0	6.8	0	7.38	6.78	7.19	7.02	7.13	16	25	10	1	0	0.08	C16H25NO10	CHNO
390.156	0	0	0	6.92	6.69	0	0	6.87	20	25	7	1	0	0.06	C20H25NO7	CHNO
390.177	0	0	0	7.14	0	0	0	6.86	17	29	9	1	0	0.09	C17H29NO9	CHNO
390.192	0	0	0	0	0	0	0	6.89	21	29	6	1	0	-0.13	C21H29NO6	CHNO
390.213	0	0	0	6.92	0	0	0	0	18	33	8	1	0	-0.01	C18H33NO8	CHNO
391.07	0	0	0	6.83	0	6.91	0	0	15	20	10	0	1	0	C15H20O10S	CHOS
391.088	0	0	0	0	0	7.46	7.27	0	15	20	12	0	0	-0.04	C15H20O12	CHO
391.099	0	0	0	6.74	0	0	0	0	14	20	11	2	0	0.1	C14H20N2O11	CHNO
391.103	0	0	0	7.03	6.74	7.06	7.05	7	19	20	9	0	0	0.02	C19H20O9	CHO
391.107	0	0	0	0	0	6.71	6.84	0	16	24	9	0	1	-0.03	C16H24O9S	CHOS
391.115	0	0	0	0	0	0	0	6.72	18	20	8	2	0	-0.28	C18H20N2O8	CHNO
391.136	0	0	0	7.17	0	0	0	6.76	15	24	10	2	0	-0.07	C15H24N2O10	CHNO
391.14	0	6.78	0	7.64	7.07	7.11	7.04	7.31	20	24	8	0	0	-0.02	C20H24O8	CHO
391.151	0	0	0	0	0	0	0	6.93	19	24	7	2	0	-0.09	C19H24N2O7	CHNO
391.161	0	7.01	7.23	7.32	6.79	7.25	7.16	7.46	17	28	10	0	0	0.16	C17H28O10	CHO
391.187	0	0	0	0	0	0	0	6.72	20	28	6	2	0	-0.21	C20H28N2O6	CHNO
391.197	0	0	6.88	7.04	0	0	0	7.1	18	32	9	0	0	-0.18	C18H32O9	CHO
391.213	0	6.76	6.82	7.42	6.92	0	0	7.06	22	32	6	0	0	-0.13	C22H32O6	CHO
391.249	0	0	0	6.81	0	0	0	0	23	36	5	0	0	0	C23H36O5	CHO
392.084	0	0	0	0	0	6.73	0	0	14	19	12	1	0	0.16	C14H19NO12	CHNO
392.099	0	0	0	0	0	6.94	6.76	6.86	18	19	9	1	0	-0.21	C18H19NO9	CHNO
392.102	0	0	0	0	6.79	0	0	0	15	23	9	1	1	-0.12	C15H23NO9S	CHNOS
392.12	0	0	0	7.46	6.94	7.13	7.1	7.2	15	23	11	1	0	-0.07	C15H23NO11	CHNO
392.135	0	6.75	0	7.03	6.81	6.97	6.9	7.04	19	23	8	1	0	-0.03	C19H23NO8	CHNO
392.156	0	0	0	7.25	0	0	0	7.02	16	27	10	1	0	0.07	C16H27NO10	CHNO
392.193	0	0	0	6.75	0	0	0	0	17	31	9	1	0	-0.19	C17H31NO9	CHNO
392.208	0	0	0	0	6.75	0	0	6.92	21	31	6	1	0	-0.15	C21H31NO6	CHNO
393.05	0	0	0	0	0	6.85	0	0	14	18	11	0	1	-0.05	C14H18O11S	CHOS
393.083	0	0	0	6.79	0	7.14	7.06	6.86	18	18	10	0	0	0.11	C18H18O10	CHO
393.086	0	6.88	0	7.4	6.86	7.33	7.2	6.81	15	22	10	0	1	0.09	C15H22O10S	CHOS
393.094	0	0	0	0	0	6.77	0	0	17	18	9	2	0	0.22	C17H18N2O9	CHNO
393.104	0	0	0	0	0	7.25	7.1	0	15	22	12	0	0	-0.08	C15H22O12	CHO
393.115	0	0	0	6.94	0	0	0	0	14	22	11	2	0	-0.09	C14H22N2O11	CHNO
393.122	6.82	6.87	0	6.9	6.79	7.07	6.93	6.73	16	26	9	0	1	-0.12	C16H26O9S	CHOS
393.13	0	0	0	6.83	0	6.91	6.7	6.89	18	22	8	2	0	0.06	C18H22N2O8	CHNO
393.14	0	0	0	6.88	0	7.21	7.08	7.15	16	26	11	0	0	0.09	C16H26O11	CHO
393.151	0	0	0	7	0	0	0	0	15	26	10	2	0	0.02	C15H26N2O10	CHNO
393.156	0	7.22	7.12	7.85	7.32	7.28	7.23	7.54	20	26	8	0	0	0.1	C20H26O8	CHO
393.167	0	0	6.78	0	6.75	0	0	7.02	19	26	7	2	0	-0.14	C19H26N2O7	CHNO
393.177	0	0	0	6.86	0	0	0	6.99	17	30	10	0	0	-0.04	C17H30O10	CHO
393.192	0	6.97	7.02	7.67	7.2	7.05	6.89	7.4	21	30	7	0	0	-0.13	C21H30O7	CHO
393.203	0	0	0	0	0	0	0	6.72	20	30	6	2	0	-0.11	C20H30N2O6	CHNO
393.228	0	0	0	7.37	6.79	0	0	7.02	22	34	6	0	0	0.06	C22H34O6	CHO
393.265	0	0	0	6.82	0	0	0	0	23	38	5	0	0	-0.12	C23H38O5	CHO
394.078	0	0	0	0	0	6.98	6.7	0	17	17	10	1	0	0.08	C17H17NO10	CHNO
394.081	0	6.73	0	0	0	6.7	0	0	14	21	10	1	1	0.21	C14H21NO10S	CHNOS
394.099	0	0	0	6.87	0	6.74	6.8	0	14	21	12	1	0	0.12	C14H21NO12	CHNO
394.114	0	0	0	7.01	0	7.28	7.09	7.06	18	21	9	1	0	-0.1	C18H21NO9	CHNO
394.118	0	0	0	0	6.99	0	0	0	15	25	9	1	1	0.01	C15H25NO9S	CHNOS
394.135	0	0	0	7.4	6.77	6.75	6.72	7.1	15	25	11	1	0	-0.07	C15H25NO11	CHNO
394.172	0	0	0	6.9	0	0	0	0	16	29	10	1	0	0.11	C16H29NO10	CHNO
394.187	6.73	6.88	7.03	7.06	7.11	0	0	7.27	20	29	7	1	0	-0.19	C20H29NO7	CHNO
394.223	0	0	6.73	6.71	0	0	0	6.84	21	33	6	1	0	-0.12	C21H33NO6	CHNO
395.062	0	0	0	0	0	6.95	0	0	17	16	11	0	0	0.05	C17H16O11	CHO
395.065	0	0	0	7.14	0	7.34	7.13	0	14	20	11	0	1	-0.04	C14H20O11S	CHOS
395.071	6.74	6.76	0	0	0	0	0	0	20	16	5	2	1	-0.27	C20H16N2O5S	CHNOS
395.094	0	0	0	6.92	0	0	0	0	13	20	12	2	0	0.23	C13H20N2O12	CHNO
395.098	0	0	0	7.12	6.96	7.45	7.32	7.24	18	20	10	0	0	0.3	C18H20O10	CHO
395.102	7.01	7.23	6.89	7.72	7.12	7.52	7.47	7.1	15	24	10	0	1	0.14	C15H24O10S	CHOS
395.11	0	0	0	0	0	7.01	6.77	6.76	17	20	9	2	0	0.17	C17H20N2O9	CHNO
395.138	6.81	6.78	0	6.91	0	7	7.02	0	16	28	9	0	1	-0.08	C16H28O9S	CHOS
395.146	0	0	6.85	7.03	6.82	7.01	6.79	7.2	18	24	8	2	0	-0.11	C18H24N2O8	CHNO
395.169	0	0	0	6.75	0	0	0	0	24	28	3	0	1	0.28	C24H28O3S	CHOS
395.182	0	0	6.91	0	6.71	0	0	7.01	19	28	7	2	0	-0.02	C19H28N2O7	CHNO
395.207	6.79	6.99	7.08	7.72	7.14	7	6.95	7.52	21	32	7	0	0	-0.15	C21H32O7	CHO
395.244	0	0	0	7.36	0	0	6.7	7.04	22	36	6	0	0	-0.13	C22H36O6	CHO
395.317	0	0	0	0	0	0	6.71	0	24	44	4	0	0	-0.12	C24H44O4	CHO
396.057	0	0	0	0	0	6.7	0	0	16	15	11	1	0	0.17	C16H15NO11	CHNO
396.094	0	0	0	7.22	0	7.26	7.16	7	17	19	10	1	0	0.17	C17H19NO10	CHNO
396.106	6.75	0	0	0	0	0	0	0	25	19	2	1	1	-0.26	C25H19NO2S	CHNOS
396.115	0	0	0	6.76	0	0	0	0	14	23	12	1	0	0.15	C14H23NO12	CHNO
396.13	0	6.88	0	7.39	6.97	7.37	7.3	7.35	18	23	9	1	0	0.17	C18H23NO9	CHNO
396.166	6.83	7.06	7.11	7.36	7.22	7.08	7.07	7.47	19	27	8	1	0	-0.15	C19H27NO8	CHNO
396.203	6.76	6.97	7.12	7.2	7.21	0	0	7.33	20	31	7	1	0	0.09	C20H31NO7	CHNO
397.045	0	0	0	0	0	0	6.74	0	13	18	12	0	1	-0.27	C13H18O12S	CHOS
397.078	0	0	0	0	0	7.38	7.24	6.94	17	18	11	0	0	0.18	C17H18O11	CHO
397.081	0	6.9	0	7.65	0	7.63	7.45	6.95	14	22	11	0	1	0.15	C14H22O11S	CHOS
397.089	0	0	0	0	0	6.97	0	0	16	18	10	2	0	-0.02	C16H18N2O10	CHNO
397.11	0	0	0	7.48	0	0	7.17	6.84	13	22	12	2	0	0.07	C13H22N2O12	CHNO
397.117	7.01	7.33	7.21	7.8	7.13	7.47	7.35	7.47	15	26	10	0	1	-0.09	C15H26O10S	CHOS
397.125	0	0	0	6.96	0	7.16	7.01	7.07	17	22	9	2	0	0.06	C17H22N2O9	CHNO
397.127	0	0	0	6.84	0	0	0	0	26	22	2	0	1	0.24	C26H22O2S	CHOS
397.148	0	0	6.75	6.73	0	0	0	0	23	26	4	0	1	0.13	C23H26O4S	CHOS
397.154	0	0	0	0	0	6.76	6.81	0	16	30	9	0	1	0.13	C16H30O9S	CHOS
397.162	0	0	6.78	0	0	6.83	6.8	7.2	18	26	8	2	0	-0.04	C18H26N2O8	CHNO
397.198	0	0	0	0	0	0	0	6.95	19	30	7	2	0	-0.24	C19H30N2O7	CHNO
397.223	6.74	6.93	7.03	7.71	7.04	6.91	6.86	7.46	21	34	7	0	0	0.15	C21H34O7	CHO
397.26	0	0	0	7.15	0	0	6.75	6.95	22	38	6	0	0	-0.01	C22H38O6	CHO
398.073	0	0	0	0	0	7.09	6.96	0	16	17	11	1	0	0.1	C16H17NO11	CHNO
398.076	0	6.71	0	6.7	0	6.71	0	0	13	21	11	1	1	-0.06	C13H21NO11S	CHNOS
398.109	0	6.82	6.75	7.7	7.03	7.55	7.44	7.24	17	21	10	1	0	0.14	C17H21NO10	CHNO
398.146	6.77	7.11	7.1	7.68	7.24	7.48	7.4	7.51	18	25	9	1	0	-0.21	C18H25NO9	CHNO
398.182	0	7.1	7.22	7.65	7.39	7.01	6.96	7.55	19	29	8	1	0	0.12	C19H29NO8	CHNO
398.218	0	0	6.82	6.98	6.94	0	0	7.1	20	33	7	1	0	-0.09	C20H33NO7	CHNO
399.057	0	0	0	0	0	7.05	6.8	0	16	16	12	0	0	0.26	C16H16O12	CHO
399.06	0	0	0	6.91	0	7.28	6.96	0	13	20	12	0	1	0.06	C13H20O12S	CHOS
399.093	0	0	0	7.16	6.91	7.84	7.63	7.35	17	20	11	0	0	-0.06	C17H20O11	CHO
399.097	0	7.04	6.96	7.69	6.76	7.63	7.39	7.38	14	24	11	0	1	-0.04	C14H24O11S	CHOS
399.105	0	0	0	7.07	0	7.11	6.95	6.93	16	20	10	2	0	-0.01	C16H20N2O10	CHNO
399.126	0	0	0	7.03	0	0	0	0	13	24	12	2	0	0	C13H24N2O12	CHNO
399.133	6.71	7.06	7.07	7.54	6.78	7.04	6.89	7.35	15	28	10	0	1	-0.06	C15H28O10S	CHOS
399.141	0	0	6.77	6.87	0	7.13	6.82	7.15	17	24	9	2	0	0.06	C17H24N2O9	CHNO
399.142	0	0	6.79	7.29	0	0	0	0	26	24	2	0	1	-0.11	C26H24O2S	CHOS
399.145	0	0	0	6.81	0	0	0	0	22	24	7	0	0	-0.05	C22H24O7	CHO
399.177	0	0	6.92	0	6.7	0	0	7.01	18	28	8	2	0	-0.16	C18H28N2O8	CHNO
399.202	7.11	7.45	7.7	8.06	7.54	7.39	7.32	7.99	20	32	8	0	0	-0.15	C20H32O8	CHO
399.218	0	0	0	6.75	0	0	0	0	24	32	5	0	0	-0.14	C24H32O5	CHO
399.239	0	6.76	6.79	7.47	6.85	6.81	6.8	7.24	21	36	7	0	0	-0.06	C21H36O7	CHO
399.275	0	0	0	6.91	0	6.83	7.13	6.76	22	40	6	0	0	-0.03	C22H40O6	CHO
400.055	0	0	0	7.06	6.74	0	0	0	12	19	12	1	1	-0.13	C12H19NO12S	CHNOS
400.089	0	0	0	7.01	0	7.44	7.26	6.94	16	19	11	1	0	-0.03	C16H19NO11	CHNO
400.092	0	0	0	6.75	0	0	0	0	13	23	11	1	1	-0.02	C13H23NO11S	CHNOS
400.125	0	7	7.03	7.9	7.3	7.63	7.53	7.49	17	23	10	1	0	-0.02	C17H23NO10	CHNO
400.161	0	7.09	7.13	7.66	7.31	7.32	7.23	7.53	18	27	9	1	0	-0.09	C18H27NO9	CHNO
400.198	0	6.83	7.01	7.52	7.22	6.75	6.72	7.37	19	31	8	1	0	-0.03	C19H31NO8	CHNO
400.213	0	0	0	6.74	0	0	0	0	23	31	5	1	0	-0.09	C23H31NO5	CHNO
401.073	0	0	0	0	0	7.52	7.28	6.72	16	18	12	0	0	0.17	C16H18O12	CHO
401.076	0	0	0	6.94	0	7.23	6.9	0	13	22	12	0	1	-0.07	C13H22O12S	CHOS
401.084	0	0	0	7.07	0	6.83	0	0	15	18	11	2	0	-0.07	C15H18N2O11	CHNO
401.112	0	0	0	7.25	0	6.96	6.71	7	14	26	11	0	1	0.06	C14H26O11S	CHOS
401.12	0	0	0	6.99	0	7.08	6.95	7	16	22	10	2	0	0.06	C16H22N2O10	CHNO
401.124	0	0	0	6.96	0	0	0	6.73	21	22	8	0	0	0	C21H22O8	CHO
401.157	0	0	0	6.85	6.77	6.79	6.72	7.05	17	26	9	2	0	-0.06	C17H26N2O9	CHNO
401.182	7.18	7.6	7.88	8	7.62	7.75	7.69	8.14	19	30	9	0	0	-0.06	C19H30O9	CHO
401.197	0	0	0	7.01	0	0	0	6.76	23	30	6	0	0	0.08	C23H30O6	CHO
401.218	6.82	7.1	7.41	7.74	7.24	7.15	7.24	7.68	20	34	8	0	0	-0.17	C20H34O8	CHO
401.254	0	0	0	7.12	6.7	0	6.89	6.93	21	38	7	0	0	-0.03	C21H38O7	CHO
402.071	0	0	0	7.07	0	0	0	0	12	21	12	1	1	-0.2	C12H21NO12S	CHNOS
402.104	0	0	0	7.16	0	7.48	7.31	7.04	16	21	11	1	0	0.08	C16H21NO11	CHNO
402.119	0	0	0	0	0	0	0	6.81	20	21	8	1	0	0.07	C20H21NO8	CHNO
402.141	6.73	6.99	6.92	7.81	7.17	7.5	7.39	7.41	17	25	10	1	0	0.05	C17H25NO10	CHNO
402.153	6.92	6.73	6.99	0	0	0	0	6.76	25	25	2	1	1	-0.37	C25H25NO2S	CHNOS
402.156	0	0	0	0	6.71	0	0	0	21	25	7	1	0	-0.11	C21H25NO7	CHNO
402.177	0	6.91	6.89	7.58	7.1	6.98	6.93	7.43	18	29	9	1	0	0.09	C18H29NO9	CHNO
402.192	0	0	0	6.84	6.75	0	0	6.79	22	29	6	1	0	-0.1	C22H29NO6	CHNO
402.213	0	0	0	7	0	0	0	7	19	33	8	1	0	-0.03	C19H33NO8	CHNO
402.268	0	0	0	6.72	0	0	0	0	21	41	4	1	1	-0.01	C21H41NO4S	CHNOS
403.088	0	0	0	6.83	0	7.7	7.48	7.01	16	20	12	0	0	0.19	C16H20O12	CHO
403.1	0	0	0	0	0	6.79	0	0	15	20	11	2	0	0.2	C15H20N2O11	CHNO
403.103	0	0	0	6.82	6.81	6.72	0	6.8	20	20	9	0	0	0.08	C20H20O9	CHO
403.136	0	0	0	6.97	0	0	0	6.96	16	24	10	2	0	0.06	C16H24N2O10	CHNO
403.137	6.88	0	6.9	7.05	6.69	0	0	0	25	24	3	0	1	-0.02	C25H24O3S	CHOS
403.151	0	0	0	0	0	0	0	6.73	20	24	7	2	0	0.09	C20H24N2O7	CHNO
403.172	0	0	0	0	0	0	0	6.72	17	28	9	2	0	0.18	C17H28N2O9	CHNO
403.188	0	0	0	0	0	0	0	6.73	21	28	6	2	0	0.17	C21H28N2O6	CHNO
403.197	6.75	7.24	7.58	7.62	7.33	7.39	7.54	7.79	19	32	9	0	0	-0.06	C19H32O9	CHO
403.213	0	0	0	7.12	0	0	0	6.75	23	32	6	0	0	-0.02	C23H32O6	CHO
403.234	0	0	6.79	7.2	6.8	6.8	6.84	7.16	20	36	8	0	0	-0.06	C20H36O8	CHO
403.249	0	0	0	6.85	0	0	0	0	24	36	5	0	0	-0.08	C24H36O5	CHO
404.05	0	0	0	6.83	0	0	0	0	11	19	13	1	1	-0.27	C11H19NO13S	CHNOS
404.083	0	0	0	0	0	6.91	6.86	0	15	19	12	1	0	0.09	C15H19NO12	CHNO
404.12	0	0	0	7.39	6.88	7.34	7.24	7.08	16	23	11	1	0	0.02	C16H23NO11	CHNO
404.135	0	0	0	6.85	6.7	6.75	0	6.84	20	23	8	1	0	-0.05	C20H23NO8	CHNO
404.156	0	0	6.79	7.63	7.02	7.13	7.16	7.32	17	27	10	1	0	-0.05	C17H27NO10	CHNO
404.193	0	0	0	7.3	6.83	0	0	7.05	18	31	9	1	0	0.02	C18H31NO9	CHNO
404.208	0	0	0	0	0	0	0	6.74	22	31	6	1	0	-0.04	C22H31NO6	CHNO
404.229	0	0	0	6.86	0	0	0	0	19	35	8	1	0	-0.19	C19H35NO8	CHNO
405.067	0	0	0	0	0	6.92	0	0	15	18	13	0	0	-0.17	C15H18O13	CHO
405.083	0	0	0	0	0	6.79	0	0	19	18	10	0	0	0.18	C19H18O10	CHO
405.104	0	0	0	6.87	0	7.62	7.48	7.04	16	22	12	0	0	0.05	C16H22O12	CHO
405.115	0	0	0	7.01	0	0	0	0	15	22	11	2	0	-0.01	C15H22N2O11	CHNO
405.122	0	6.75	0	0	0	6.71	0	0	17	26	9	0	1	-0.27	C17H26O9S	CHOS
405.13	0	0	0	0	0	0	0	6.72	19	22	8	2	0	-0.09	C19H22N2O8	CHNO
405.151	0	0	0	6.88	0	0	0	0	16	26	10	2	0	0.03	C16H26N2O10	CHNO
405.167	0	0	0	0	0	0	0	6.84	20	26	7	2	0	0.13	C20H26N2O7	CHNO
405.177	0	6.99	7.38	7.43	7.02	7.27	7.13	7.53	18	30	10	0	0	0.01	C18H30O10	CHO
405.213	0	0	6.84	7.04	6.74	0	0	7.14	19	34	9	0	0	-0.18	C19H34O9	CHO
405.228	0	0	0	7.05	6.76	0	0	6.74	23	34	6	0	0	0.05	C23H34O6	CHO
405.265	0	0	0	6.84	0	0	0	0	24	38	5	0	0	-0.05	C24H38O5	CHO
406.099	0	0	0	6.95	0	6.97	6.79	0	15	21	12	1	0	0.05	C15H21NO12	CHNO
406.114	0	0	0	6.88	0	6.93	6.76	6.85	19	21	9	1	0	0.1	C19H21NO9	CHNO
406.135	0	0	0	7.33	6.75	7.07	7.03	6.98	16	25	11	1	0	0.02	C16H25NO11	CHNO
406.172	0	0	0	7.33	0	0	0	6.98	17	29	10	1	0	0.05	C17H29NO10	CHNO
406.187	0	6.77	6.77	6.93	6.93	0	0	6.97	21	29	7	1	0	-0.14	C21H29NO7	CHNO
406.208	0	0	0	6.86	0	0	0	0	18	33	9	1	0	0.02	C18H33NO9	CHNO
407.065	0	0	0	6.79	0	6.78	6.77	0	15	20	11	0	1	0.14	C15H20O11S	CHOS
407.083	0	0	0	0	0	6.87	0	0	15	20	13	0	0	0.19	C15H20O13	CHO
407.098	0	0	0	6.79	0	7.04	6.97	6.96	19	20	10	0	0	0.12	C19H20O10	CHO
407.102	0	0	0	6.8	0	6.94	6.88	0	16	24	10	0	1	-0.02	C16H24O10S	CHOS
407.11	0	0	0	0	0	6.8	0	0	18	20	9	2	0	-0.03	C18H20N2O9	CHNO
407.12	0	0	0	0	0	7.22	7.09	6.73	16	24	12	0	0	0.23	C16H24O12	CHO
407.131	0	0	0	7.29	0	0	0	6.8	15	24	11	2	0	-0.03	C15H24N2O11	CHNO
407.138	0	0	0	0	0	6.75	0	0	17	28	9	0	1	0.01	C17H28O9S	CHOS
407.146	0	0	0	0	0	6.74	0	6.92	19	24	8	2	0	0.11	C19H24N2O8	CHNO
407.156	0	0	6.77	6.9	0	7.01	6.95	7.14	17	28	11	0	0	0.01	C17H28O11	CHO
407.182	0	0	0	0	0	0	0	6.85	20	28	7	2	0	0.15	C20H28N2O7	CHNO
407.192	0	0	6.78	6.83	0	0	0	6.91	18	32	10	0	0	-0.23	C18H32O10	CHO
407.207	0	6.95	7.13	7.72	7.18	0	6.75	7.39	22	32	7	0	0	-0.14	C22H32O7	CHO
407.244	0	0	0	7.15	0	0	0	0	23	36	6	0	0	-0.02	C23H36O6	CHO
408.094	0	0	0	0	0	6.92	6.75	0	18	19	10	1	0	0.14	C18H19NO10	CHNO
408.097	0	6.85	0	0	6.97	0	0	0	15	23	10	1	1	-0.05	C15H23NO10S	CHNOS
408.115	0	0	0	7.07	0	6.75	6.72	0	15	23	12	1	0	-0.06	C15H23NO12	CHNO
408.13	0	0	0	7.07	6.72	7	6.88	7.02	19	23	9	1	0	0	C19H23NO9	CHNO
408.151	0	0	0	7.09	0	0	0	0	16	27	11	1	0	-0.05	C16H27NO11	CHNO
408.164	6.73	0	0	0	0	0	0	0	24	27	3	1	1	-0.25	C24H27NO3S	CHNOS
408.188	0	0	0	6.78	0	0	0	0	17	31	10	1	0	0.08	C17H31NO10	CHNO
408.203	0	0	6.81	6.83	6.78	0	0	6.99	21	31	7	1	0	-0.12	C21H31NO7	CHNO
409.078	0	0	0	0	0	6.92	6.8	0	18	18	11	0	0	0.04	C18H18O11	CHO
409.081	0	0	0	7.15	0	7.21	7.05	0	15	22	11	0	1	-0.05	C15H22O11S	CHOS
409.11	0	0	0	6.87	0	0	0	0	14	22	12	2	0	-0.03	C14H22N2O12	CHNO
409.114	0	0	0	7.17	6.79	7.29	7.19	7.14	19	22	10	0	0	0	C19H22O10	CHO
409.117	0	6.76	0	6.94	0	7.08	6.95	0	16	26	10	0	1	0.13	C16H26O10S	CHOS
409.125	0	0	0	0	0	6.85	6.74	6.87	18	22	9	2	0	0.14	C18H22N2O9	CHNO
409.146	0	0	0	7.35	0	0	0	0	15	26	11	2	0	-0.03	C15H26N2O11	CHNO
409.148	0	0	0	6.73	0	0	0	0	24	26	4	0	1	0.16	C24H26O4S	CHOS
409.162	0	0	6.73	0	0	6.71	0	7.01	19	26	8	2	0	-0.14	C19H26N2O8	CHNO
409.198	0	0	0	0	0	0	0	6.81	20	30	7	2	0	0.07	C20H30N2O7	CHNO
409.223	0	6.86	6.89	7.5	6.91	0	6.71	7.18	22	34	7	0	0	-0.01	C22H34O7	CHO
409.26	0	0	0	7.05	0	0	0	0	23	38	6	0	0	0.11	C23H38O6	CHO
410.073	0	0	0	0	0	6.81	0	0	17	17	11	1	0	0.04	C17H17NO11	CHNO
410.109	0	0	0	6.96	0	7.2	7.06	6.94	18	21	10	1	0	-0.09	C18H21NO10	CHNO
410.113	0	6.77	0	6.78	6.9	0	0	0	15	25	10	1	1	-0.05	C15H25NO10S	CHNOS
410.13	0	0	0	6.86	0	0	0	0	15	25	12	1	0	-0.11	C15H25NO12	CHNO
410.146	0	6.81	0	7.43	6.93	7.17	7.07	7.24	19	25	9	1	0	0.06	C19H25NO9	CHNO
410.182	0	6.94	6.97	7.18	7.09	6.71	6.75	7.25	20	29	8	1	0	0.04	C20H29NO8	CHNO
410.218	0	0	6.73	6.75	0	0	0	6.89	21	33	7	1	0	-0.19	C21H33NO7	CHNO
411.057	0	0	0	0	0	6.72	0	0	17	16	12	0	0	0.21	C17H16O12	CHO
411.093	0	0	0	6.72	0	7.31	7.24	7.01	18	20	11	0	0	0.05	C18H20O11	CHO
411.097	0	6.86	0	7.38	6.73	7.32	7.22	6.83	15	24	11	0	1	0.05	C15H24O11S	CHOS
411.105	0	0	0	0	0	6.96	6.75	0	17	20	10	2	0	0.18	C17H20N2O10	CHNO
411.133	0	0	0	6.83	0	6.85	6.83	0	16	28	10	0	1	0.25	C16H28O10S	CHOS
411.141	0	0	0	6.77	0	6.96	6.87	6.98	18	24	9	2	0	0.04	C18H24N2O9	CHNO
411.177	0	0	6.76	0	0	0	0	7	19	28	8	2	0	-0.23	C19H28N2O8	CHNO
411.202	6.85	7.1	7.19	7.64	7.08	7.15	7.05	7.53	21	32	8	0	0	-0.14	C21H32O8	CHO
411.239	0	0	6.83	7.34	6.7	0	6.72	7.15	22	36	7	0	0	-0.05	C22H36O7	CHO
411.275	0	0	0	6.81	0	0	0	0	23	40	6	0	0	-0.01	C23H40O6	CHO
411.312	0	0	0	0	0	0	6.75	0	24	44	5	0	0	0.23	C24H44O5	CHO
411.348	7.02	0	0	0	0	6.95	7.33	6.73	25	48	4	0	0	-0.24	C25H48O4	CHO
412.089	0	0	0	0	0	7.17	7.03	0	17	19	11	1	0	0.13	C17H19NO11	CHNO
412.125	0	6.71	0	7.22	0	7.27	7.2	7.1	18	23	10	1	0	0.09	C18H23NO10	CHNO
412.198	0	6.86	6.88	7.43	7.1	6.76	0	7.32	20	31	8	1	0	0.02	C20H31NO8	CHNO
413.073	0	0	0	0	0	7.17	7.01	0	17	18	12	0	0	0	C17H18O12	CHO
413.076	0	0	0	7.16	0	7.31	7.07	0	14	22	12	0	1	0.08	C14H22O12S	CHOS
413.084	0	0	0	0	0	6.77	0	0	16	18	11	2	0	0.25	C16H18N2O11	CHNO
413.105	0	0	0	6.9	0	0	0	0	13	22	13	2	0	0.08	C13H22N2O13	CHNO
413.109	0	0	0	7.11	6.8	7.71	7.6	7.33	18	22	11	0	0	0.04	C18H22O11	CHO
413.112	0	7.02	6.86	7.46	6.76	7.27	7.13	7.14	15	26	11	0	1	-0.11	C15H26O11S	CHOS
413.12	0	0	0	7.22	6.73	7.07	6.91	6.94	17	22	10	2	0	-0.02	C17H22N2O10	CHNO
413.122	0	0	0	6.83	0	0	0	0	26	22	3	0	1	0.21	C26H22O3S	CHOS
413.141	0	0	0	6.9	0	0	0	0	14	26	12	2	0	-0.12	C14H26N2O12	CHNO
413.157	0	0	0	0	0	6.88	0	6.96	18	26	9	2	0	-0.04	C18H26N2O9	CHNO
413.193	0	0	6.71	0	0	0	0	6.86	19	30	8	2	0	-0.13	C19H30N2O8	CHNO
413.218	6.72	6.92	7.11	7.58	6.97	6.97	7	7.45	21	34	8	0	0	-0.05	C21H34O8	CHO
413.254	0	0	0	7.12	0	0	6.81	7.01	22	38	7	0	0	0.02	C22H38O7	CHO
413.27	0	0	0	6.84	0	0	0	0	26	38	4	0	0	0	C26H38O4	CHO
413.291	0	0	0	6.78	0	0	6.71	0	23	42	6	0	0	-0.18	C23H42O6	CHO
414.104	0	0	0	7.17	0	7.38	7.29	6.9	17	21	11	1	0	0.01	C17H21NO11	CHNO
414.141	0	6.79	0	7.43	7.01	7.45	7.26	7.32	18	25	10	1	0	-0.07	C18H25NO10	CHNO
414.177	6.71	7.06	6.99	7.53	7.17	6.96	7.05	7.44	19	29	9	1	0	-0.11	C19H29NO9	CHNO
414.213	0	0	6.73	7.15	6.89	0	0	7.14	20	33	8	1	0	-0.11	C20H33NO8	CHNO
415.092	0	0	0	7.08	0	7.14	6.93	0	14	24	12	0	1	0.17	C14H24O12S	CHOS
415.101	0	0	0	6.8	0	0	0	0	25	20	4	0	1	0.21	C25H20O4S	CHOS
415.128	0	6.71	0	7.18	0	6.73	0	7.11	15	28	11	0	1	-0.02	C15H28O11S	CHOS
415.136	6.82	6.81	0	7.83	7.14	7.01	6.94	7.34	17	24	10	2	0	-0.04	C17H24N2O10	CHNO
415.137	0	0	0	6.99	0	0	0	0	26	24	3	0	1	0.22	C26H24O3S	CHOS
415.172	0	0	6.74	6.74	0	0	0	6.88	18	28	9	2	0	-0.05	C18H28N2O9	CHNO
415.174	0	0	0	6.82	0	0	0	0	27	28	2	0	1	0.24	C27H28O2S	CHOS
415.197	6.96	7.34	7.54	7.77	7.33	7.42	7.49	7.83	20	32	9	0	0	-0.07	C20H32O9	CHO
415.213	0	0	0	6.73	0	0	0	0	24	32	6	0	0	-0.15	C24H32O6	CHO
415.234	0	6.77	6.83	7.35	6.93	6.85	6.96	7.29	21	36	8	0	0	0.04	C21H36O8	CHO
415.27	0	0	0	6.76	0	0	6.8	6.72	22	40	7	0	0	-0.21	C22H40O7	CHO
415.307	0	0	0	6.74	0	0	0	0	23	44	6	0	0	0.16	C23H44O6	CHO
416.05	0	0	0	6.76	0	0	0	0	12	19	13	1	1	-0.16	C12H19NO13S	CHNOS
416.083	0	0	0	0	0	7.08	6.86	0	16	19	12	1	0	0.09	C16H19NO12	CHNO
416.12	0	0	0	7.34	6.81	7.43	7.37	7.14	17	23	11	1	0	0.07	C17H23NO11	CHNO
416.135	0	0	0	6.73	0	0	0	0	21	23	8	1	0	-0.01	C21H23NO8	CHNO
416.156	6.78	6.95	6.85	7.58	7.1	7.31	7.17	7.39	18	27	10	1	0	-0.03	C18H27NO10	CHNO
416.193	0	6.86	6.8	7.52	7.12	6.77	6.76	7.46	19	31	9	1	0	0.08	C19H31NO9	CHNO
416.208	0	0	0	6.78	0	0	0	0	23	31	6	1	0	0.09	C23H31NO6	CHNO
417.067	0	0	0	0	0	7.1	6.8	0	16	18	13	0	0	0	C16H18O13	CHO
417.104	0	0	0	6.83	0	7.76	7.6	7.19	17	22	12	0	0	0.13	C17H22O12	CHO
417.115	0	0	0	6.83	0	6.81	0	6.83	16	22	11	2	0	-0.05	C16H22N2O11	CHNO
417.119	0	0	0	6.93	0	6.83	0	6.87	21	22	9	0	0	-0.01	C21H22O9	CHO
417.151	0	0	0	6.9	0	0	0	6.92	17	26	10	2	0	-0.01	C17H26N2O10	CHNO
417.203	0	0	0	0	0	0	0	6.73	22	30	6	2	0	0.03	C22H30N2O6	CHNO
417.213	6.81	7.07	7.3	7.52	7.19	7.27	7.51	7.54	20	34	9	0	0	-0.08	C20H34O9	CHO
417.228	0	0	0	6.87	0	0	0	0	24	34	6	0	0	-0.06	C24H34O6	CHO
417.249	0	0	0	6.92	0	0	0	6.75	21	38	8	0	0	0.08	C21H38O8	CHO
418.066	0	0	0	6.92	0	0	0	0	12	21	13	1	1	-0.09	C12H21NO13S	CHNOS
418.099	0	0	0	6.86	0	7.24	7.11	0	16	21	12	1	0	0.2	C16H21NO12	CHNO
418.114	0	0	0	0	0	6.79	6.71	0	20	21	9	1	0	0.06	C20H21NO9	CHNO
418.136	0	6.88	0	7.51	6.93	7.4	7.23	7.21	17	25	11	1	0	0.11	C17H25NO11	CHNO
418.151	0	0	0	6.77	0	6.76	0	6.88	21	25	8	1	0	-0.01	C21H25NO8	CHNO
418.172	0	6.89	6.85	7.57	7.04	7.06	7.09	7.46	18	29	10	1	0	-0.04	C18H29NO10	CHNO
418.208	0	0	0	7.17	6.71	0	0	7.06	19	33	9	1	0	-0.01	C19H33NO9	CHNO
419.098	0	0	0	0	0	6.91	6.81	6.75	20	20	10	0	0	0.13	C20H20O10	CHO
419.131	0	0	0	6.81	0	0	0	0	16	24	11	2	0	0.08	C16H24N2O11	CHNO
419.167	0	0	0	6.84	0	0	0	0	17	28	10	2	0	0.07	C17H28N2O10	CHNO
419.182	0	0	0	0	0	0	0	6.86	21	28	7	2	0	0.17	C21H28N2O7	CHNO
419.192	0	7.02	7.33	7.35	7.02	7.13	7.07	7.55	19	32	10	0	0	0	C19H32O10	CHO
419.207	0	0	6.71	7.32	6.89	0	0	7.17	23	32	7	0	0	-0.15	C23H32O7	CHO
419.219	0	0	0	0	0	0	0	6.74	22	32	6	2	0	0.22	C22H32N2O6	CHNO
419.229	0	0	6.71	6.97	0	0	0	7.01	20	36	9	0	0	-0.14	C20H36O9	CHO
419.244	0	0	0	7.09	0	0	0	6.79	24	36	6	0	0	0.07	C24H36O6	CHO
420.094	0	0	0	0	0	6.87	0	6.75	19	19	10	1	0	-0.19	C19H19NO10	CHNO
420.115	0	0	0	7.17	0	7.19	7.11	6.88	16	23	12	1	0	0.16	C16H23NO12	CHNO
420.13	0	0	0	6.9	0	6.96	6.8	6.92	20	23	9	1	0	0.11	C20H23NO9	CHNO
420.151	0	6.74	0	7.59	7.01	7.14	7.16	7.18	17	27	11	1	0	0.03	C17H27NO11	CHNO
420.188	0	0	0	7.37	6.72	6.77	0	6.96	18	31	10	1	0	0.04	C18H31NO10	CHNO
420.203	0	0	6.7	7.19	6.86	0	0	7.03	22	31	7	1	0	-0.05	C22H31NO7	CHNO
420.224	0	0	0	6.74	0	0	0	0	19	35	9	1	0	0	C19H35NO9	CHNO
420.242	6.88	7.04	7.07	7.51	7.02	0	0	0	20	39	6	1	1	-0.19	C20H39NO6S	CHNOS
421.078	0	0	0	0	0	6.92	6.83	0	19	18	11	0	0	0.24	C19H18O11	CHO
421.081	0	0	0	6.77	0	6.99	6.79	0	16	22	11	0	1	0.27	C16H22O11S	CHOS
421.099	0	0	0	0	0	7.26	7.09	0	16	22	13	0	0	0.14	C16H22O13	CHO
421.11	0	0	0	7.05	0	0	0	0	15	22	12	2	0	-0.08	C15H22N2O12	CHNO
421.114	0	0	0	7.17	6.92	7.22	7.09	7.18	20	22	10	0	0	0.07	C20H22O10	CHO
421.117	0	6.83	0	6.88	6.8	6.97	6.97	0	17	26	10	0	1	-0.08	C17H26O10S	CHOS
421.125	0	0	0	0	0	6.81	0	6.73	19	22	9	2	0	-0.13	C19H22N2O9	CHNO
421.146	0	0	0	6.94	0	0	0	0	16	26	11	2	0	0.09	C16H26N2O11	CHNO
421.162	0	0	0	6.9	0	0	0	6.98	20	26	8	2	0	0.05	C20H26N2O8	CHNO
421.172	0	6.73	7.02	7.09	0	7.06	7.04	7.34	18	30	11	0	0	0.06	C18H30O11	CHO
421.198	0	0	6.77	0	6.78	0	0	6.97	21	30	7	2	0	0	C21H30N2O7	CHNO
421.208	0	0	6.78	6.91	0	0	0	7.01	19	34	10	0	0	-0.14	C19H34O10	CHO
421.223	0	0	6.91	7.48	6.95	0	0	7.22	23	34	7	0	0	-0.15	C23H34O7	CHO
421.26	0	0	0	7.2	6.71	0	0	6.8	24	38	6	0	0	-0.08	C24H38O6	CHO
422.109	0	0	0	7	0	7.11	6.91	6.91	19	21	10	1	0	0.23	C19H21NO10	CHNO
422.13	0	0	0	7.22	0	6.93	6.84	6.88	16	25	12	1	0	0.14	C16H25NO12	CHNO
422.167	0	0	0	7.38	0	0	6.74	6.96	17	29	11	1	0	0.21	C17H29NO11	CHNO
422.203	0	0	0	6.96	0	0	0	0	18	33	10	1	0	0.11	C18H33NO10	CHNO
422.218	0	0	0	7.09	6.86	0	0	7.09	22	33	7	1	0	0.06	C22H33NO7	CHNO
423.06	0	0	0	0	0	6.97	6.88	0	15	20	12	0	1	0.15	C15H20O12S	CHOS
423.093	0	0	0	6.79	6.77	7.2	7.13	7.09	19	20	11	0	0	-0.03	C19H20O11	CHO
423.097	0	6.73	0	7.14	0	7.21	7.16	0	16	24	11	0	1	0.02	C16H24O11S	CHOS
423.105	0	0	0	6.94	0	6.82	0	0	18	20	10	2	0	0.08	C18H20N2O10	CHNO
423.115	0	0	0	0	0	6.98	0	0	16	24	13	0	0	0.24	C16H24O13	CHO
423.126	0	0	0	7.54	0	0	0	6.97	15	24	12	2	0	-0.15	C15H24N2O12	CHNO
423.133	6.76	6.86	0	7.08	0	7.07	6.99	6.79	17	28	10	0	1	-0.07	C17H28O10S	CHOS
423.141	0	0	0	6.91	6.72	7.04	6.78	7.03	19	24	9	2	0	-0.1	C19H24N2O9	CHNO
423.151	0	0	0	6.73	0	0	6.72	0	17	28	12	0	0	-0.09	C17H28O12	CHO
423.162	0	0	0	6.92	0	0	0	0	16	28	11	2	0	0.05	C16H28N2O11	CHNO
423.177	0	0	6.89	6.74	6.85	6.77	0	7.14	20	28	8	2	0	-0.1	C20H28N2O8	CHNO
423.187	0	0	0	6.79	0	0	0	0	18	32	11	0	0	0.14	C18H32O11	CHO
423.214	0	0	6.74	0	0	0	0	6.84	21	32	7	2	0	-0.17	C21H32N2O7	CHNO
423.239	0	6.77	6.89	7.59	6.94	0	0	7.26	23	36	7	0	0	-0.13	C23H36O7	CHO
423.275	0	0	0	7.16	0	0	0	0	24	40	6	0	0	-0.01	C24H40O6	CHO
424.089	0	0	0	0	0	7.12	6.96	6.76	18	19	11	1	0	0.1	C18H19NO11	CHNO
424.092	6.71	6.93	0	6.96	7.05	6.77	6.79	0	15	23	11	1	1	-0.11	C15H23NO11S	CHNOS
424.11	0	0	0	6.78	0	0	0	0	15	23	13	1	0	0	C15H23NO13	CHNO
424.125	0	0	0	7.43	6.89	7.38	7.33	7.24	19	23	10	1	0	0.01	C19H23NO10	CHNO
424.146	0	0	0	7.04	0	0	0	0	16	27	12	1	0	0.02	C16H27NO12	CHNO
424.182	0	0	0	6.82	0	0	0	0	17	31	11	1	0	0.06	C17H31NO11	CHNO
424.198	6.75	6.94	7.06	7.34	7.13	6.76	6.78	7.37	21	31	8	1	0	-0.17	C21H31NO8	CHNO
424.234	0	0	6.76	6.79	6.73	0	0	6.9	22	35	7	1	0	-0.14	C22H35NO7	CHNO
425.076	0	0	0	7.2	0	7.26	7.12	0	15	22	12	0	1	0.08	C15H22O12S	CHOS
425.084	0	0	0	0	0	6.75	0	0	17	18	11	2	0	0.15	C17H18N2O11	CHNO
425.105	0	0	0	6.99	0	0	0	0	14	22	13	2	0	-0.01	C14H22N2O13	CHNO
425.109	0	6.74	0	7.11	6.97	7.58	7.48	7.28	19	22	11	0	0	0.06	C19H22O11	CHO
425.112	0	6.76	0	7.24	6.81	7.26	7.2	6.9	16	26	11	0	1	-0.16	C16H26O11S	CHOS
425.12	0	0	0	6.8	0	7.02	6.82	6.84	18	22	10	2	0	-0.06	C18H22N2O10	CHNO
425.141	0	0	0	7.58	0	0	6.73	6.91	15	26	12	2	0	0.03	C15H26N2O12	CHNO
425.149	0	0	0	6.96	0	6.79	6.8	0	17	30	10	0	1	0.17	C17H30O10S	CHOS
425.157	0	0	6.77	6.92	6.74	7.08	6.84	7.18	19	26	9	2	0	0.04	C19H26N2O9	CHNO
425.193	0	0	6.98	6.84	6.83	0	0	7.13	20	30	8	2	0	-0.14	C20H30N2O8	CHNO
425.218	6.83	7.13	7.29	7.91	7.31	7.03	7.02	7.66	22	34	8	0	0	-0.07	C22H34O8	CHO
425.254	0	0	6.76	7.51	6.87	0	0	7.21	23	38	7	0	0	-0.09	C23H38O7	CHO
425.291	0	0	0	7	0	0	0	0	24	42	6	0	0	0.03	C24H42O6	CHO
425.327	0	0	0	0	0	0	6.94	0	25	46	5	0	0	0.11	C25H46O5	CHO
426.068	0	0	0	0	0	6.72	0	0	17	17	12	1	0	-0.32	C17H17NO12	CHNO
426.071	0	0	0	6.75	0	0	0	0	14	21	12	1	1	0.15	C14H21NO12S	CHNOS
426.104	0	0	0	7.05	0	7.44	7.29	7.02	18	21	11	1	0	0.08	C18H21NO11	CHNO
426.108	6.91	6.95	0	7.14	7.19	6.76	0	0	15	25	11	1	1	-0.1	C15H25NO11S	CHNOS
426.141	0	6.87	6.78	7.63	7.1	7.48	7.29	7.39	19	25	10	1	0	-0.05	C19H25NO10	CHNO
426.213	0	6.8	6.99	7.19	6.99	0	0	7.2	21	33	8	1	0	-0.11	C21H33NO8	CHNO
427.088	0	0	0	6.8	0	7.45	7.33	6.96	18	20	12	0	0	0.27	C18H20O12	CHO
427.092	0	0	0	7.44	0	7.42	7.3	6.87	15	24	12	0	1	0.1	C15H24O12S	CHOS
427.099	0	0	0	6.94	0	6.94	0	0	17	20	11	2	0	0.05	C17H20N2O11	CHNO
427.128	0	0	0	7.19	0	7	6.94	6.81	16	28	11	0	1	0.21	C16H28O11S	CHOS
427.172	0	0	6.91	6.88	6.82	6.82	6.74	7.15	19	28	9	2	0	-0.03	C19H28N2O9	CHNO
427.209	0	0	0	0	0	0	0	6.83	20	32	8	2	0	0.16	C20H32N2O8	CHNO
427.234	6.74	6.87	7.15	7.71	7.12	7.01	7.11	7.55	22	36	8	0	0	0.06	C22H36O8	CHO
427.27	0	0	0	7.26	6.74	0	0	6.91	23	40	7	0	0	0.07	C23H40O7	CHO
427.307	0	0	0	6.82	0	0	6.9	0	24	44	6	0	0	0.08	C24H44O6	CHO
428.084	0	0	0	0	0	7.11	6.92	0	17	19	12	1	0	0.24	C17H19NO12	CHNO
428.087	0	6.74	0	6.92	6.76	0	0	0	14	23	12	1	1	-0.03	C14H23NO12S	CHNOS
428.12	0	6.76	0	7.38	6.86	7.52	7.39	7.25	18	23	11	1	0	0.08	C18H23NO11	CHNO
428.123	0	0	0	6.74	6.71	0	0	0	15	27	11	1	1	0.17	C15H27NO11S	CHNOS
428.193	6.79	6.97	7.12	7.74	7.34	7	6.93	7.48	20	31	9	1	0	-0.06	C20H31NO9	CHNO
428.229	0	0	0	6.96	0	0	0	6.96	21	35	8	1	0	0.1	C21H35NO8	CHNO
429.068	0	0	0	0	0	7.03	6.8	0	17	18	13	0	0	0.19	C17H18O13	CHO
429.071	0	0	0	0	0	6.83	0	0	14	22	13	0	1	0.21	C14H22O13S	CHOS
429.104	0	0	0	7.05	6.82	7.74	7.65	7.3	18	22	12	0	0	0.11	C18H22O12	CHO
429.107	0	6.74	0	7.29	0	7.18	7	6.91	15	26	12	0	1	0.01	C15H26O12S	CHOS
429.115	0	0	0	7.49	6.75	7.12	6.87	7.03	17	22	11	2	0	0	C17H22N2O11	CHNO
429.138	6.84	0	0	0	0	0	0	0	23	26	6	0	1	-0.26	C23H26O6S	CHOS
429.144	0	0	0	6.76	0	0	0	0	16	30	11	0	1	-0.16	C16H30O11S	CHOS
429.152	0	0	0	6.99	0	7.02	6.85	7.05	18	26	10	2	0	0.19	C18H26N2O10	CHNO
429.188	0	0	0	6.84	6.71	0	0	6.99	19	30	9	2	0	0	C19H30N2O9	CHNO
429.203	0	0	0	7.14	0	0	0	0	23	30	6	2	0	-0.06	C23H30N2O6	CHNO
429.213	6.89	7.06	7.34	7.74	7.27	7.33	7.33	7.72	21	34	9	0	0	-0.08	C21H34O9	CHO
429.228	0	0	0	6.84	0	0	0	0	25	34	6	0	0	0.05	C25H34O6	CHO
429.249	0	6.74	0	7.34	6.92	6.82	6.88	7.17	22	38	8	0	0	0.1	C22H38O8	CHO
429.286	6.95	6.78	0	6.9	0	6.8	7.38	6.83	23	42	7	0	0	-0.13	C23H42O7	CHO
429.322	0	0	0	6.76	0	0	0	0	24	46	6	0	0	0.02	C24H46O6	CHO
430.066	0	0	0	6.79	0	0	0	0	13	21	13	1	1	0.06	C13H21NO13S	CHNOS
430.099	0	0	0	6.86	0	7.31	7.1	6.85	17	21	12	1	0	-0.01	C17H21NO12	CHNO
430.133	6.93	0	0	0	0	0	0	0	22	25	6	1	1	-0.24	C22H25NO6S	CHNOS
430.135	0	6.85	0	7.41	6.93	7.43	7.31	7.23	18	25	11	1	0	0.04	C18H25NO11	CHNO
430.151	0	0	0	6.78	0	0	0	0	22	25	8	1	0	0.11	C22H25NO8	CHNO
430.172	0	7.03	6.98	7.71	7.25	7.23	7.1	7.46	19	29	10	1	0	-0.03	C19H29NO10	CHNO
430.208	0	0	6.82	7.46	7.09	0	6.72	7.23	20	33	9	1	0	0.02	C20H33NO9	CHNO
431.083	0	0	0	0	0	7.39	7.17	0	17	20	13	0	0	0.25	C17H20O13	CHO
431.123	0	0	0	6.72	0	0	0	6.75	15	28	12	0	1	-0.03	C15H28O12S	CHOS
431.131	0	0	6.71	7.74	6.99	6.86	6.85	7.09	17	24	11	2	0	-0.07	C17H24N2O11	CHNO
431.135	0	0	0	7.06	6.76	6.81	6.71	6.78	22	24	9	0	0	0.15	C22H24O9	CHO
431.167	0	0	0	6.87	0	0	0	6.93	18	28	10	2	0	0.11	C18H28N2O10	CHNO
431.169	0	0	0	6.8	0	6.78	0	0	27	28	3	0	1	-0.08	C27H28O3S	CHOS
431.192	6.85	7.27	7.51	7.69	7.34	7.47	7.44	7.75	20	32	10	0	0	-0.09	C20H32O10	CHO
431.207	0	0	0	7.2	0	0	0	6.95	24	32	7	0	0	-0.07	C24H32O7	CHO
431.229	0	6.81	6.97	7.37	7	7.33	7.79	7.33	21	36	9	0	0	-0.02	C21H36O9	CHO
431.244	0	0	0	6.94	0	0	0	0	25	36	6	0	0	0.13	C25H36O6	CHO
431.265	0	0	0	0	0	0	0	6.77	22	40	8	0	0	0	C22H40O8	CHO
432.151	0	6.83	0	7.46	6.9	7.25	7.12	7.19	18	27	11	1	0	0.21	C18H27NO11	CHNO
432.187	0	6.88	6.87	7.54	7.06	6.81	6.9	7.42	19	31	10	1	0	-0.08	C19H31NO10	CHNO
432.203	0	0	0	6.81	6.73	0	0	6.8	23	31	7	1	0	0.07	C23H31NO7	CHNO
432.224	0	0	0	7.09	0	0	0	6.76	20	35	9	1	0	0.13	C20H35NO9	CHNO
433.099	0	0	0	0	0	7.38	7.28	6.84	17	22	13	0	0	0.17	C17H22O13	CHO
433.114	0	0	0	0	0	6.86	0	6.83	21	22	10	0	0	0.2	C21H22O10	CHO
433.146	0	0	0	7.03	0	0	0	0	17	26	11	2	0	-0.03	C17H26N2O11	CHNO
433.208	0	6.81	7.12	7.24	6.89	6.82	6.8	7.32	20	34	10	0	0	-0.09	C20H34O10	CHO
433.223	0	0	0	7.16	0	0	0	6.92	24	34	7	0	0	0.09	C24H34O7	CHO
433.26	0	0	0	6.93	0	0	0	0	25	38	6	0	0	0.01	C25H38O6	CHO
433.296	0	0	0	0	0	0	0	6.95	26	42	5	0	0	0.06	C26H42O5	CHO
434.13	0	0	0	7.16	0	7.13	7.05	6.83	17	25	12	1	0	0.03	C17H25NO12	CHNO
434.146	0	0	0	6.87	0	6.79	0	6.89	21	25	9	1	0	0.08	C21H25NO9	CHNO
434.167	0	6.77	0	7.44	6.81	6.94	6.98	7.11	18	29	11	1	0	-0.01	C18H29NO11	CHNO
434.185	0	0	0	7.4	0	0	0	0	19	33	8	1	1	0.01	C19H33NO8S	CHNOS
434.203	0	0	0	7.19	0	0	0	7.03	19	33	10	1	0	0.14	C19H33NO10	CHNO
434.219	0	0	0	0	0	0	0	6.79	23	33	7	1	0	0.17	C23H33NO7	CHNO
435.078	0	0	0	0	0	6.76	0	0	16	20	14	0	0	0.01	C16H20O14	CHO
435.093	0	0	0	0	0	6.73	6.78	0	20	20	11	0	0	-0.21	C20H20O11	CHO
435.097	0	0	0	0	0	6.74	6.79	0	17	24	11	0	1	-0.01	C17H24O11S	CHOS
435.115	0	0	0	0	0	7.27	7.1	0	17	24	13	0	0	0.22	C17H24O13	CHO
435.126	0	0	0	6.75	0	0	0	0	16	24	12	2	0	-0.04	C16H24N2O12	CHNO
435.13	0	0	0	7.11	6.73	7.07	6.96	7.03	21	24	10	0	0	0.08	C21H24O10	CHO
435.133	0	0	0	0	0	6.72	0	0	18	28	10	0	1	-0.31	C18H28O10S	CHOS
435.187	0	0	6.91	6.94	0	0	0	7.15	19	32	11	0	0	-0.18	C19H32O11	CHO
435.224	0	0	0	6.72	0	0	0	0	20	36	10	0	0	0.01	C20H36O10	CHO
435.239	0	0	0	7.19	0	0	0	7	24	36	7	0	0	0	C24H36O7	CHO
435.275	0	0	0	6.94	0	0	0	0	25	40	6	0	0	-0.02	C25H40O6	CHO
436.11	0	0	0	0	0	6.71	6.76	0	16	23	13	1	0	-0.05	C16H23NO13	CHNO
436.125	0	0	0	6.88	0	6.85	6.83	6.89	20	23	10	1	0	-0.11	C20H23NO10	CHNO
436.146	0	0	0	7.18	0	6.94	6.73	6.82	17	27	12	1	0	0.1	C17H27NO12	CHNO
436.182	0	0	0	7.17	0	0	0	6.85	18	31	11	1	0	0.02	C18H31NO11	CHNO
436.234	0	0	0	0	0	0	0	6.75	23	35	7	1	0	0.13	C23H35NO7	CHNO
436.291	0	0	0	7.18	0	0	0	0	21	43	8	1	0	-0.21	C21H43NO8	CHNO
437.109	0	0	0	0	0	7.12	7.03	6.91	20	22	11	0	0	0.23	C20H22O11	CHO
437.112	0	0	0	6.74	0	6.95	6.91	0	17	26	11	0	1	0.15	C17H26O11S	CHOS
437.12	0	0	0	0	0	6.82	0	0	19	22	10	2	0	-0.08	C19H22N2O10	CHNO
437.13	0	0	0	0	0	6.91	6.71	0	17	26	13	0	0	0.05	C17H26O13	CHO
437.141	0	0	0	6.83	0	0	0	0	16	26	12	2	0	0.01	C16H26N2O12	CHNO
437.149	0	6.76	0	0	0	0	0	0	18	30	10	0	1	0.21	C18H30O10S	CHOS
437.157	0	0	0	6.73	0	6.78	0	6.88	20	26	9	2	0	-0.09	C20H26N2O9	CHNO
437.193	0	0	0	0	0	0	0	6.89	21	30	8	2	0	0.07	C21H30N2O8	CHNO
437.218	0	6.96	6.87	7.45	6.88	6.81	0	7.28	23	34	8	0	0	0.02	C23H34O8	CHO
437.255	0	0	0	7.28	0	0	0	6.96	24	38	7	0	0	0.05	C24H38O7	CHO
437.291	0	0	0	6.81	0	0	0	0	25	42	6	0	0	0.15	C25H42O6	CHO
438.104	0	0	0	0	0	7.05	6.93	6.77	19	21	11	1	0	-0.14	C19H21NO11	CHNO
438.141	0	0	0	7.32	6.83	7.19	7.12	7.06	20	25	10	1	0	0	C20H25NO10	CHNO
438.162	0	0	0	6.92	0	0	0	0	17	29	12	1	0	-0.11	C17H29NO12	CHNO
438.213	6.74	6.78	6.77	7.36	6.88	0	0	7.14	22	33	8	1	0	-0.16	C22H33NO8	CHNO
439.088	0	0	0	0	0	7.08	6.88	6.73	19	20	12	0	0	0.1	C19H20O12	CHO
439.092	0	0	0	6.83	0	7.2	7	0	16	24	12	0	1	-0.04	C16H24O12S	CHOS
439.1	0	0	0	0	0	6.72	0	0	18	20	11	2	0	0.25	C18H20N2O11	CHNO
439.121	0	0	0	7.15	0	0	0	0	15	24	13	2	0	-0.01	C15H24N2O13	CHNO
439.125	0	6.77	0	6.99	6.77	7.43	7.31	7.23	20	24	11	0	0	0	C20H24O11	CHO
439.128	0	6.74	0	6.97	0	7.03	6.94	6.74	17	28	11	0	1	0.23	C17H28O11S	CHOS
439.136	0	0	0	0	0	6.97	6.74	6.82	19	24	10	2	0	0.12	C19H24N2O10	CHNO
439.172	0	0	6.76	0	0	6.79	6.73	7.01	20	28	9	2	0	-0.08	C20H28N2O9	CHNO
439.209	0	0	0	0	0	0	0	6.88	21	32	8	2	0	-0.04	C21H32N2O8	CHNO
439.234	0	6.83	7.01	7.52	6.93	6.76	6.79	7.37	23	36	8	0	0	-0.11	C23H36O8	CHO
439.27	0	0	0	7.2	0	0	0	6.95	24	40	7	0	0	-0.01	C24H40O7	CHO
439.343	0	0	0	0	0	0	6.73	0	26	48	5	0	0	0	C26H48O5	CHO
439.379	6.72	0	0	0	0	6.9	7.34	0	27	52	4	0	0	-0.33	C27H52O4	CHO
440.081	7.07	6.76	0	0	0	0	0	0	22	19	7	1	1	-0.37	C22H19NO7S	CHNOS
440.083	0	0	0	0	0	6.99	6.76	0	18	19	12	1	0	-0.28	C18H19NO12	CHNO
440.087	0	0	0	6.76	6.8	0	0	0	15	23	12	1	1	-0.11	C15H23NO12S	CHNOS
440.12	0	0	0	7.13	0	7.2	7.12	6.97	19	23	11	1	0	0.1	C19H23NO11	CHNO
440.229	0	0	6.71	6.8	0	0	0	6.96	22	35	8	1	0	-0.21	C22H35NO8	CHNO
441.104	0	0	0	6.77	0	7.38	7.23	7.1	19	22	12	0	0	0.15	C19H22O12	CHO
441.107	0	0	0	7	0	7.09	6.92	0	16	26	12	0	1	-0.15	C16H26O12S	CHOS
441.115	0	0	0	0	0	6.9	0	0	18	22	11	2	0	-0.02	C18H22N2O11	CHNO
441.136	0	0	0	7.15	0	0	0	0	15	26	13	2	0	0	C15H26N2O13	CHNO
441.144	0	0	0	7.03	0	0	0	0	17	30	11	0	1	-0.06	C17H30O11S	CHOS
441.152	0	0	0	0	0	6.93	6.78	7	19	26	10	2	0	0.15	C19H26N2O10	CHNO
441.188	0	6.73	6.75	0	0	0	0	7.1	20	30	9	2	0	-0.09	C20H30N2O9	CHNO
441.213	6.9	7.16	7.31	7.78	7.19	7.14	7.14	7.7	22	34	9	0	0	-0.15	C22H34O9	CHO
441.249	0	6.75	6.82	7.45	6.78	0	6.73	7.34	23	38	8	0	0	-0.03	C23H38O8	CHO
441.286	0	0	0	7	0	0	0	6.87	24	42	7	0	0	-0.01	C24H42O7	CHO
442.099	0	0	0	0	0	7.22	7.1	0	18	21	12	1	0	0.06	C18H21NO12	CHNO
442.102	0	6.77	0	6.88	6.86	0	0	0	15	25	12	1	1	-0.1	C15H25NO12S	CHNOS
442.135	0	0	0	7.46	6.89	7.45	7.34	7.2	19	25	11	1	0	-0.03	C19H25NO11	CHNO
442.208	0	0	6.74	7.15	6.82	6.75	6.72	7.1	21	33	9	1	0	-0.16	C21H33NO9	CHNO
443.086	0	0	0	6.86	0	7.03	6.86	0	15	24	13	0	1	-0.13	C15H24O13S	CHOS
443.123	0	0	0	6.88	0	0	0	0	16	28	12	0	1	-0.04	C16H28O12S	CHOS
443.131	0	0	0	6.85	0	6.94	6.84	6.81	18	24	11	2	0	0.19	C18H24N2O11	CHNO
443.132	0	0	0	6.95	0	0	0	0	27	24	4	0	1	0.19	C27H24O4S	CHOS
443.167	0	0	0	6.92	0	6.93	0	7.06	19	28	10	2	0	0.11	C19H28N2O10	CHNO
443.203	0	0	0	0	0	0	0	6.85	20	32	9	2	0	-0.09	C20H32N2O9	CHNO
443.208	0	0	0	6.89	0	0	0	0	25	32	7	0	0	0.01	C25H32O7	CHO
443.229	6.8	7.03	7.13	7.59	7.06	7.09	7.16	7.58	22	36	9	0	0	-0.13	C22H36O9	CHO
443.244	0	0	0	6.77	0	0	0	0	26	36	6	0	0	-0.11	C26H36O6	CHO
443.265	0	0	0	7.16	0	0	6.86	7.04	23	40	8	0	0	-0.12	C23H40O8	CHO
443.301	6.99	6.84	0	0	0	6.88	7.29	6.85	24	44	7	0	0	-0.09	C24H44O7	CHO
444.078	0	0	0	0	0	6.88	0	0	17	19	13	1	0	-0.02	C17H19NO13	CHNO
444.115	0	0	0	7	0	7.44	7.29	6.95	18	23	12	1	0	-0.07	C18H23NO12	CHNO
444.224	0	0	0	7.03	0	0	0	6.94	21	35	9	1	0	-0.15	C21H35NO9	CHNO
445.062	0	0	0	0	0	6.81	0	0	17	18	14	0	0	0.02	C17H18O14	CHO
445.099	0	0	0	0	0	7.6	7.45	6.96	18	22	13	0	0	0.2	C18H22O13	CHO
445.107	6.94	6.8	0	0	0	0	0	0	21	22	7	2	1	-0.28	C21H22N2O7S	CHNOS
445.11	0	0	0	7.18	0	6.84	6.73	0	17	22	12	2	0	0.05	C17H22N2O12	CHNO
445.112	0	0	0	6.79	0	0	0	0	26	22	5	0	1	-0.03	C26H22O5S	CHOS
445.146	0	0	0	7.06	0	6.92	6.74	6.9	18	26	11	2	0	-0.05	C18H26N2O11	CHNO
445.148	0	0	6.72	7.02	0	0	0	0	27	26	4	0	1	-0.05	C27H26O4S	CHOS
445.183	0	0	0	7.04	0	0	0	6.84	19	30	10	2	0	-0.01	C19H30N2O10	CHNO
445.208	6.81	7.17	7.31	7.62	7.17	7.34	7.4	7.65	21	34	10	0	0	0.05	C21H34O10	CHO
445.223	0	0	0	7.15	6.77	0	0	6.95	25	34	7	0	0	-0.03	C25H34O7	CHO
445.244	0	0	6.74	7.28	6.8	6.87	7.05	7.23	22	38	9	0	0	-0.09	C22H38O9	CHO
445.26	0	0	0	6.92	0	0	0	0	26	38	6	0	0	-0.04	C26H38O6	CHO
445.281	0	0	0	6.81	0	0	0	0	23	42	8	0	0	-0.13	C23H42O8	CHO
445.296	0	0	0	6.76	0	0	0	0	27	42	5	0	0	-0.01	C27H42O5	CHO
446.094	0	0	0	0	0	7.15	6.96	0	17	21	13	1	0	0.12	C17H21NO13	CHNO
446.13	0	6.76	0	7.26	0	7.49	7.34	7.11	18	25	12	1	0	0.01	C18H25NO12	CHNO
446.146	0	0	0	6.86	0	0	0	6.79	22	25	9	1	0	-0.08	C22H25NO9	CHNO
446.203	0	0	6.76	7.58	7.07	6.78	6.81	7.35	20	33	10	1	0	-0.21	C20H33NO10	CHNO
446.218	0	0	0	0	6.74	0	0	6.83	24	33	7	1	0	-0.16	C24H33NO7	CHNO
446.24	0	0	0	6.9	0	0	0	0	21	37	9	1	0	-0.03	C21H37NO9	CHNO
446.258	6.88	6.89	6.97	7.51	7.01	0	0	0	22	41	6	1	1	-0.33	C22H41NO6S	CHNOS
447.078	0	0	0	0	0	7.05	6.75	0	17	20	14	0	0	0.24	C17H20O14	CHO
447.093	0	0	0	0	0	0	6.75	0	21	20	11	0	0	-0.35	C21H20O11	CHO
447.126	0	0	0	7.76	0	6.8	6.72	7.01	17	24	12	2	0	-0.09	C17H24N2O12	CHNO
447.13	0	0	0	6.99	6.76	6.93	6.9	6.97	22	24	10	0	0	0.06	C22H24O10	CHO
447.162	0	0	0	7.01	0	0	0	0	18	28	11	2	0	0.02	C18H28N2O11	CHNO
447.177	0	0	0	0	0	0	0	6.85	22	28	8	2	0	-0.12	C22H28N2O8	CHNO
447.214	0	0	0	0	0	0	0	6.84	23	32	7	2	0	0.11	C23H32N2O7	CHNO
447.224	0	6.73	6.94	7.27	6.82	6.83	6.9	7.35	21	36	10	0	0	0.06	C21H36O10	CHO
447.239	0	0	0	7.32	6.79	0	0	7.04	25	36	7	0	0	-0.08	C25H36O7	CHO
447.275	0	0	0	6.89	0	0	0	6.8	26	40	6	0	0	0.04	C26H40O6	CHO
447.312	0	0	0	0	0	0	0	6.76	27	44	5	0	0	-0.13	C27H44O5	CHO
448.088	0	0	0	0	0	0	6.73	0	20	19	11	1	0	-0.31	C20H19NO11	CHNO
448.11	0	0	0	6.8	0	7.21	7.08	0	17	23	13	1	0	0.07	C17H23NO13	CHNO
448.125	0	0	0	6.8	0	6.97	6.89	6.88	21	23	10	1	0	-0.13	C21H23NO10	CHNO
448.146	0	6.75	0	7.45	7.03	7.38	7.28	7.18	18	27	12	1	0	-0.22	C18H27NO12	CHNO
448.182	0	6.84	6.85	7.63	7.09	7.03	7.01	7.46	19	31	11	1	0	-0.03	C19H31NO11	CHNO
448.219	0	0	0	7.31	6.71	0	0	6.84	20	35	10	1	0	0.05	C20H35NO10	CHNO
448.234	0	0	0	0	6.78	0	0	6.76	24	35	7	1	0	0.02	C24H35NO7	CHNO
448.274	6.77	6.8	6.88	7.44	6.99	0	0	0	22	43	6	1	1	-0.4	C22H43NO6S	CHNOS
449.105	0	0	0	6.83	0	0	0	0	16	22	13	2	0	0.1	C16H22N2O13	CHNO
449.109	0	0	0	6.76	0	7.06	6.86	6.88	21	22	11	0	0	-0.05	C21H22O11	CHO
449.112	0	0	0	6.79	0	6.76	6.9	0	18	26	11	0	1	-0.01	C18H26O11S	CHOS
449.141	0	0	0	7.16	0	6.73	0	6.88	17	26	12	2	0	-0.01	C17H26N2O12	CHNO
449.143	0	0	6.82	6.85	0	0	0	0	26	26	5	0	1	-0.23	C26H26O5S	CHOS
449.149	0	6.74	0	0	0	0	0	0	19	30	10	0	1	-0.2	C19H30O10S	CHOS
449.157	0	0	0	6.74	0	6.8	0	6.92	21	26	9	2	0	-0.02	C21H26N2O9	CHNO
449.176	0	0	0	6.76	0	0	0	0	30	26	4	0	0	-0.05	C30H26O4	CHO
449.178	0	0	0	6.97	0	0	0	0	18	30	11	2	0	0	C18H30N2O11	CHNO
449.193	0	0	6.71	0	6.82	0	0	7.03	22	30	8	2	0	-0.23	C22H30N2O8	CHNO
449.203	0	6.8	7.01	7.2	6.82	6.91	6.78	7.36	20	34	11	0	0	-0.08	C20H34O11	CHO
449.218	0	6.86	7	7.65	7.04	6.88	6.83	7.38	24	34	8	0	0	-0.12	C24H34O8	CHO
449.229	0	0	0	0	0	0	0	6.85	23	34	7	2	0	0.07	C23H34N2O7	CHNO
449.239	0	0	0	6.83	0	0	0	0	21	38	10	0	0	-0.07	C21H38O10	CHO
449.254	0	0	0	7.45	6.79	0	0	7.05	25	38	7	0	0	0.01	C25H38O7	CHO
449.291	0	0	0	6.82	0	0	0	0	26	42	6	0	0	0	C26H42O6	CHO
450.062	0	0	0	0	0	0	0	0	26	13	7	1	0	-0.23	C26H13NO7	CHNO
450.104	0	0	0	0	0	7.01	6.91	6.78	20	21	11	1	0	-0.25	C20H21NO11	CHNO
450.125	0	0	0	7.08	0	7.16	7.02	6.79	17	25	13	1	0	-0.04	C17H25NO13	CHNO
450.141	0	0	0	7.21	6.85	7.16	7.07	7.16	21	25	10	1	0	-0.09	C21H25NO10	CHNO
450.162	0	0	0	7.46	6.9	7.14	7.01	7.17	18	29	12	1	0	0.1	C18H29NO12	CHNO
450.198	0	0	0	7.4	6.73	6.72	0	7.19	19	33	11	1	0	0.04	C19H33NO11	CHNO
450.234	0	0	0	6.84	0	0	0	0	20	37	10	1	0	-0.08	C20H37NO10	CHNO
450.25	0	0	0	0	6.8	0	0	6.81	24	37	7	1	0	0.02	C24H37NO7	CHNO
451.088	0	0	0	0	0	7.02	6.96	6.82	20	20	12	0	0	0.07	C20H20O12	CHO
451.092	0	0	0	6.81	0	7.06	6.99	0	17	24	12	0	1	-0.08	C17H24O12S	CHOS
451.099	0	0	0	0	0	6.78	0	0	19	20	11	2	0	-0.14	C19H20N2O11	CHNO
451.109	0	0	0	0	0	7.07	6.9	0	17	24	14	0	0	-0.04	C17H24O14	CHO
451.121	0	0	0	7.01	0	0	0	0	16	24	13	2	0	-0.04	C16H24N2O13	CHNO
451.125	0	0	0	7.1	6.89	7.3	7.29	7.17	21	24	11	0	0	-0.02	C21H24O11	CHO
451.128	0	6.79	0	6.99	6.79	7.02	7.09	6.75	18	28	11	0	1	0.14	C18H28O11S	CHOS
451.136	0	0	0	0	0	7	0	6.93	20	24	10	2	0	-0.06	C20H24N2O10	CHNO
451.157	0	0	0	7.19	0	0	0	0	17	28	12	2	0	0.01	C17H28N2O12	CHNO
451.159	6.9	0	0	6.94	6.72	0	0	0	26	28	5	0	1	0.12	C26H28O5S	CHOS
451.164	0	0	0	6.81	0	0	0	0	19	32	10	0	1	-0.1	C19H32O10S	CHOS
451.172	0	6.77	0	6.98	6.83	6.87	6.74	7.05	21	28	9	2	0	-0.01	C21H28N2O9	CHNO
451.182	0	0	0	6.81	0	6.84	0	7.02	19	32	12	0	0	-0.1	C19H32O12	CHO
451.193	0	0	0	6.83	0	0	0	0	18	32	11	2	0	0.05	C18H32N2O11	CHNO
451.195	0	0	0	6.75	0	0	0	0	27	32	4	0	1	0.26	C27H32O4S	CHOS
451.208	0	0	6.84	0	6.77	0	0	7.04	22	32	8	2	0	-0.28	C22H32N2O8	CHNO
451.219	0	0	0	6.8	0	0	0	0	20	36	11	0	0	0.05	C20H36O11	CHO
451.234	0	6.79	7.13	7.7	7.1	6.89	6.88	7.45	24	36	8	0	0	-0.19	C24H36O8	CHO
451.245	0	0	0	0	0	0	0	6.74	23	36	7	2	0	0.18	C23H36N2O7	CHNO
451.27	0	0	0	7.48	0	0	0	7.04	25	40	7	0	0	0.03	C25H40O7	CHO
451.306	0	0	0	6.89	0	0	0	0	26	44	6	0	0	-0.1	C26H44O6	CHO
452.084	0	0	0	0	0	6.91	6.79	0	19	19	12	1	0	0.11	C19H19NO12	CHNO
452.12	0	0	0	7.08	0	7.3	7.14	6.98	20	23	11	1	0	0.13	C20H23NO11	CHNO
452.141	0	0	0	7.09	0	0	0	0	17	27	13	1	0	0.06	C17H27NO13	CHNO
452.177	0	0	0	7.26	0	0	6.79	0	18	31	12	1	0	-0.38	C18H31NO12	CHNO
452.214	0	0	0	6.91	0	0	0	0	19	35	11	1	0	-0.01	C19H35NO11	CHNO
452.229	0	0	6.88	7.08	6.9	0	0	7.1	23	35	8	1	0	-0.12	C23H35NO8	CHNO
452.265	0	0	0	0	0	0	0	6.77	24	39	7	1	0	-0.16	C24H39NO7	CHNO
453.071	0	0	0	0	0	6.92	6.78	0	16	22	13	0	1	0.25	C16H22O13S	CHOS
453.1	0	0	0	6.73	0	0	0	0	15	22	14	2	0	-0.13	C15H22N2O14	CHNO
453.104	0	0	0	6.8	6.78	7.37	7.27	7.09	20	22	12	0	0	-0.02	C20H22O12	CHO
453.107	0	0	0	7.11	6.73	7.29	7.18	6.78	17	26	12	0	1	-0.12	C17H26O12S	CHOS
453.115	0	0	0	0	0	6.96	6.95	0	19	22	11	2	0	0.06	C19H22N2O11	CHNO
453.136	0	0	0	7.18	0	0	6.81	0	16	26	13	2	0	-0.06	C16H26N2O13	CHNO
453.144	0	6.82	0	7.01	6.84	7.05	6.9	6.76	18	30	11	0	1	-0.19	C18H30O11S	CHOS
453.151	0	0	0	6.88	0	7.11	6.92	7.05	20	26	10	2	0	0.06	C20H26N2O10	CHNO
453.173	0	0	0	7.05	0	0	0	0	17	30	12	2	0	0.06	C17H30N2O12	CHNO
453.188	0	0	6.96	6.9	6.9	6.74	0	7.21	21	30	9	2	0	-0.08	C21H30N2O9	CHNO
453.224	0	0	0	0	6.72	0	0	6.94	22	34	8	2	0	-0.02	C22H34N2O8	CHNO
453.249	0	6.85	7.11	7.7	7.09	6.84	6.77	7.47	24	38	8	0	0	-0.2	C24H38O8	CHO
453.286	0	6.72	0	7.34	6.73	0	0	6.97	25	42	7	0	0	-0.09	C25H42O7	CHO
453.322	0	0	0	6.86	0	0	0	0	26	46	6	0	0	0.03	C26H46O6	CHO
454.063	0	0	0	0	0	6.72	0	0	18	17	13	1	0	0.26	C18H17NO13	CHNO
454.099	0	0	0	0	0	7.18	7	6.78	19	21	12	1	0	0.22	C19H21NO12	CHNO
454.135	0	0	0	7.53	6.91	7.44	7.35	7.27	20	25	11	1	0	0.01	C20H25NO11	CHNO
454.157	0	0	0	6.76	0	0	0	0	17	29	13	1	0	0.03	C17H29NO13	CHNO
454.193	0	0	0	6.73	0	0	0	0	18	33	12	1	0	0.22	C18H33NO12	CHNO
454.208	6.73	6.91	7.05	7.69	7.21	6.99	6.82	7.4	22	33	9	1	0	-0.31	C22H33NO9	CHNO
454.245	0	0	0	7.1	6.84	0	0	6.97	23	37	8	1	0	-0.06	C23H37NO8	CHNO
455.083	0	0	0	0	0	7.23	6.97	6.82	19	20	13	0	0	-0.12	C19H20O13	CHO
455.086	0	0	0	6.9	0	7.24	7.05	0	16	24	13	0	1	-0.09	C16H24O13S	CHOS
455.123	0	0	0	7.21	0	7.19	7.05	6.87	17	28	12	0	1	-0.12	C17H28O12S	CHOS
455.131	0	0	0	6.91	0	7.11	6.93	6.86	19	24	11	2	0	0.02	C19H24N2O11	CHNO
455.132	0	0	0	6.89	0	0	0	0	28	24	4	0	1	0.2	C28H24O4S	CHOS
455.152	0	0	0	7.07	0	0	0	0	16	28	13	2	0	0.07	C16H28N2O13	CHNO
455.159	0	0	0	6.9	0	0	0	0	18	32	11	0	1	0.02	C18H32O11S	CHOS
455.167	0	0	6.8	7.06	6.76	7.02	6.83	7.15	20	28	10	2	0	-0.15	C20H28N2O10	CHNO
455.203	0	0	6.84	6.76	6.73	0	0	7.07	21	32	9	2	0	-0.23	C21H32N2O9	CHNO
455.207	0	0	0	6.86	0	0	0	0	26	32	7	0	0	-0.09	C26H32O7	CHO
455.229	6.8	7.12	7.39	7.85	7.37	7.18	7.25	7.73	23	36	9	0	0	-0.3	C23H36O9	CHO
455.265	0	6.82	6.92	7.49	6.98	0	6.77	7.37	24	40	8	0	0	-0.22	C24H40O8	CHO
455.301	0	0	0	7.12	0	0	0	6.87	25	44	7	0	0	-0.02	C25H44O7	CHO
455.317	0	0	0	7.04	6.81	0	0	0	29	44	4	0	0	-0.12	C29H44O4	CHO
455.338	0	6.8	0	7	6.71	0	6.86	6.86	26	48	6	0	0	-0.09	C26H48O6	CHO
456.078	0	0	0	0	0	6.94	0	0	18	19	13	1	0	-0.05	C18H19NO13	CHNO
456.082	0	0	0	0	6.87	0	0	0	15	23	13	1	1	-0.14	C15H23NO13S	CHNOS
456.115	0	0	0	7	0	7.37	7.32	7.03	19	23	12	1	0	0.12	C19H23NO12	CHNO
[truncated: 1,061 more rows]
