# Supplementary material for: Biogenic, urban, and wildfire influences on the molecular compositionof dissolved organic compounds in cloud water
Source: Copernicus journal article supplement (doi:10.5194/acp-2017-628), 2017-08-22
Supplement: Supplementary file 1 [file acp-2017-628-supplement.zip]

# Supplement for Biogenic, urban, and wildfire influences on the molecular composition of dissolved organic compounds in cloud water

Ryan D. Cook<sup>1†</sup>, Ying-Hsuan Lin<sup>1,2,†,‡</sup>, Zhuoyu Peng<sup>1Δ</sup>, Eric Boone<sup>1,¥</sup>, Rosalie K. Chu<sup>3</sup>, James E. Dukett<sup>4</sup>, Matthew J. Gunsch<sup>1</sup>, Wuliang Zhang<sup>1£</sup>, Nikola Tolic<sup>3</sup>, Alexander Laskin<sup>3◇</sup>, Kerri A. Pratt<sup>1,5</sup>

<sup>1</sup> Department of Chemistry, University of Michigan, Ann Arbor, MI, USA

<sup>2</sup> Michigan Society of Fellows, University of Michigan, Ann Arbor, MI, USA

<sup>3</sup> Environmental Molecular Sciences Laboratory, Pacific Northwest National Laboratory, Richland, WA USA

<sup>4</sup> Adirondack Lake Survey Corporation, Ray Brook, NY, USA

<sup>5</sup> Department of Earth & Environmental Sciences, University of Michigan, Ann Arbor, MI, USA

<sup>†</sup> Authors contributed equally to this work.

<sup>‡</sup> Now at Department of Environmental Sciences, University of California, Riverside, Riverside, CA, USA

<sup>Δ</sup> Now at Department of Chemistry, University of Washington, Seattle, WA, USA

<sup>¥</sup> Now at College of Veterinary Medicine, Purdue University, West Lafayette, IN, USA

<sup>£</sup> Now at Department of Chemistry, Northwestern University, Evanston, IL, USA

<sup>◇</sup> Now at Department of Chemistry, Purdue University, West Lafayette, IN, USA

*Correspondence to:* Kerri A. Pratt (prattka@umich.edu)

22 **Table S1.** Average August-September total organic carbon (TOC) and sulfate cloud water  
 23 concentrations at Whiteface Mountain, NY

| Year | TOC (mg L <sup>-1</sup> ) | SO <sub>4</sub> <sup>2-</sup> (μM) |
|------|---------------------------|------------------------------------|
| 2010 | 4.09                      | 53.7                               |
| 2011 | 3.15                      | 47.7                               |
| 2012 | 4.16                      | 54.2                               |
| 2013 | 3.00                      | 45.8                               |
| 2014 | 3.06                      | 32.3                               |
| 2015 | 4.18                      | 50.5                               |

24

25 **Table S2.** Cloud water sample TOC after SPE concentration (TOC<sub>1</sub>) and after dilution  
 26 (TOC<sub>2</sub>), prior to ESI-FT-ICR analysis

| Sample ID | TOC <sub>1</sub> (mg L <sup>-1</sup> ) | TOC <sub>2</sub> (mg L <sup>-1</sup> ) |
|-----------|----------------------------------------|----------------------------------------|
| A1        | 15                                     | 15                                     |
| A2        | 32                                     | 32                                     |
| A3        | 42                                     | 42                                     |
| B1        | 37                                     | 37                                     |
| B2        | 45                                     | 45                                     |
| C1        | 361                                    | 30                                     |
| C2        | 398                                    | 30                                     |
| C3        | 153                                    | 30                                     |

27

**Table S3.** Peak assignments of cloud water samples showing the molecular formula (mf) and compound type (ct). This table can be found in “Cook\_etal\_2017\_TableS3.xlsx” The columns of the table are described below:

Column ‘A’ contains the observed peak  $m/z$   $[M-H]^-$  in the mass spectra;

Column ‘B’ contains the  $\log_{10}$  of the peak intensity of each assigned compound in sample A1 (0 denotes not identified in sample);

Column ‘C’ contains the  $\log_{10}$  of the peak intensity of each assigned compound in sample A2 (0 denotes not identified in sample);

Column ‘D’ contains the  $\log_{10}$  of the peak intensity of each assigned compound in sample A3 (0 denotes not identified in sample);

Column ‘E’ contains the  $\log_{10}$  of the peak intensity of each assigned compound in sample B1 (0 denotes not identified in sample);

Column ‘F’ contains the  $\log_{10}$  of the peak intensity of each assigned compound in sample B2 (0 denotes not identified in sample);

Column ‘G’ contains the  $\log_{10}$  of the peak intensity of each assigned compound in sample C1 (0 denotes not identified in sample);

Column ‘H’ contains the  $\log_{10}$  of the peak intensity of each assigned compound in sample C2 (0 denotes not identified in sample);

Column ‘I’ contains the  $\log_{10}$  of the peak intensity of each assigned compound in sample C3 (0 denotes not identified in sample);

Column ‘J’ contains the number of carbon atoms present in the assigned molecular structure of the compounds present;

Column ‘K’ contains the number of hydrogen atoms present in the assigned molecular structure of the compounds present;

Column ‘L’ contains the number of oxygen atoms present in the assigned molecular structure of the compounds present;

Column ‘M’ contains the number of nitrogen atoms present in the assigned molecular structure of the compounds present;

Column ‘N’ contains the number of sulfur atoms present in the assigned molecular structure of the compounds present;

Column ‘O’ contains the error (in ppm) between the peak  $m/z$  and the assigned formula’s molecular weight;

Column ‘P’ contains the mf assigned to each peak;

Column ‘Q’ contains the ct classification of the assigned mf.

**Table S4.** Average hydrogen-to-carbon (H:C) ratios and double bond equivalent (DBE) values, as well as 95% confidence intervals, for the Whiteface Mountain cloud water negative ion mass spectrometry data

| Sample           | H:C               | DBE             |
|------------------|-------------------|-----------------|
| All samples      | $1.466 \pm 0.005$ | $6.03 \pm 0.05$ |
| Biogenic (A1-A3) | $1.50 \pm 0.01$   | $5.3 \pm 0.1$   |
| Urban (B1-B2)    | $1.504 \pm 0.008$ | $5.96 \pm 0.09$ |
| Wildfire (C1-C3) | $1.427 \pm 0.007$ | $6.34 \pm 0.07$ |

**Table S5.** Summary of cloud water molecular composition from (-)ESI-FTICR-MS ( $m/z$  100-1000). The average ( $\pm$  95% confidence interval) oxygen-to-carbon (O:C) and hydrogen-to-carbon (H:C) ratios, double bond equivalents (DBE), and the number of organic compounds assigned (Total), as well as numbers and percentages by (CHO, CHOS, CHNOS, CHNO) for each sample.

| Event    | Sample ID | O:C             | H:C             | DBE             | Number (%) |          |        |          |       |
|----------|-----------|-----------------|-----------------|-----------------|------------|----------|--------|----------|-------|
|          |           |                 |                 |                 | CHO        | CHOS     | CHNOS  | CHNO     | Total |
| Biogenic | A1        | 0.47 $\pm$ 0.02 | 1.51 $\pm$ 0.03 | 4.97 $\pm$ 0.26 | 225 (53)   | 61 (14)  | 31 (7) | 110 (26) | 427   |
|          | A2        | 0.47 $\pm$ 0.01 | 1.49 $\pm$ 0.02 | 5.49 $\pm$ 0.19 | 361 (51)   | 102 (14) | 63 (9) | 181 (26) | 707   |
|          | A3        | 0.45 $\pm$ 0.01 | 1.51 $\pm$ 0.01 | 5.44 $\pm$ 0.14 | 397 (56)   | 33 (5)   | 7 (1)  | 272 (38) | 709   |
| Urban    | B1        | 0.50 $\pm$ 0.01 | 1.51 $\pm$ 0.01 | 6.05 $\pm$ 0.11 | 1008 (44)  | 227 (10) | 60 (3) | 981 (43) | 2276  |
|          | B2        | 0.46 $\pm$ 0.01 | 1.49 $\pm$ 0.01 | 5.75 $\pm$ 0.13 | 497 (53)   | 65 (7)   | 39 (4) | 338 (36) | 939   |
| Wildfire | C1        | 0.58 $\pm$ 0.01 | 1.39 $\pm$ 0.01 | 6.55 $\pm$ 0.14 | 712 (45)   | 211 (13) | 28 (2) | 644 (40) | 1595  |
|          | C2        | 0.56 $\pm$ 0.01 | 1.43 $\pm$ 0.01 | 6.14 $\pm$ 0.14 | 714 (51)   | 180 (13) | 19 (1) | 480 (35) | 1393  |
|          | C3        | 0.47 $\pm$ 0.01 | 1.46 $\pm$ 0.01 | 6.32 $\pm$ 0.11 | 858 (47)   | 93 (5)   | 10 (1) | 866 (47) | 1827  |

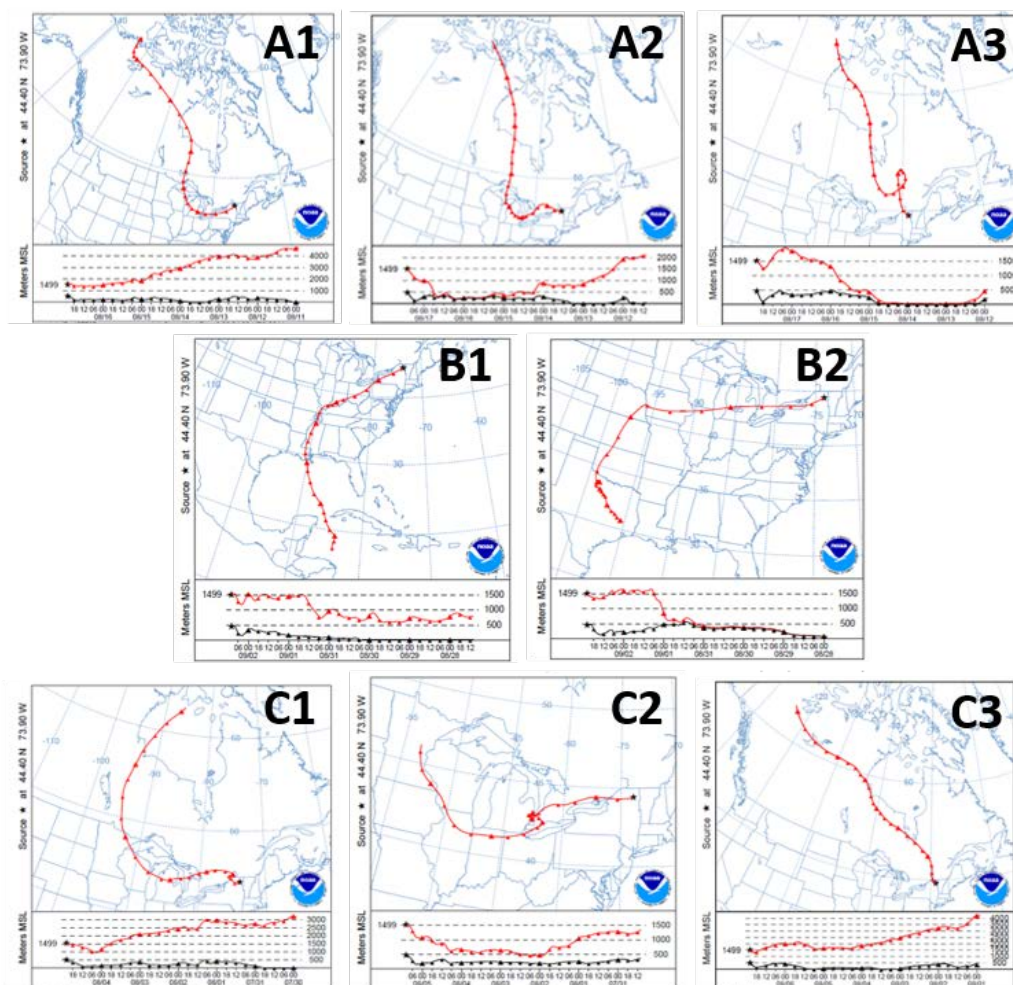

**Fig. S1.** NOAA HYSPLIT 144 h (6 day) backward air mass trajectory analysis at 1499 m (red line) above mean sea level (MSL) in 6 h intervals for the cloud water samples collected on (A1-3) August 16-17, 2014, (B1-2) September 2, 2014, and (C1-3) August 4-6, 2014.

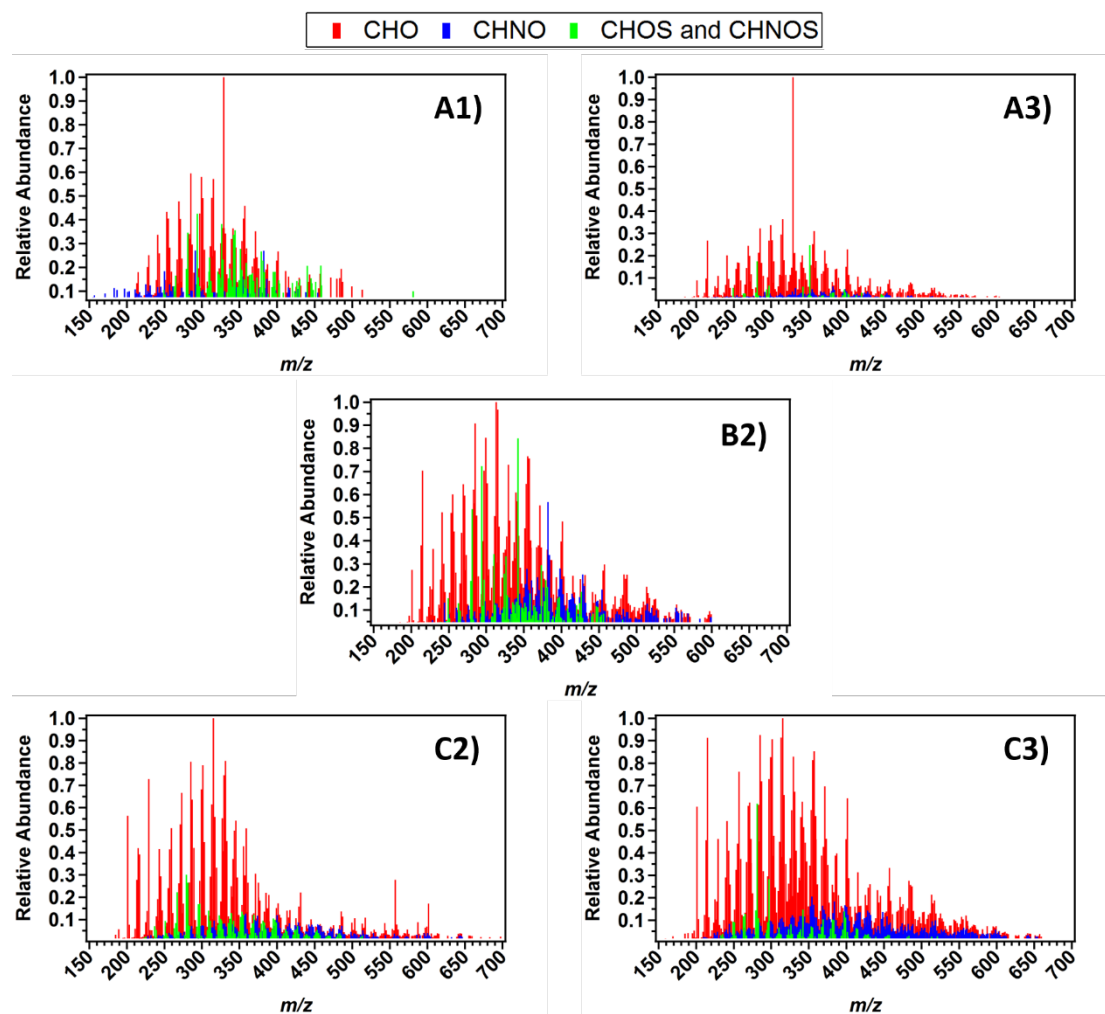

76

77 **Fig. S2.** Reconstructed ESI-FTICR-MS negative ion mass spectra of compound types (CHO,  
 78 CHNO, CHOS, and CHNOS) for cloud water samples collected during biogenic influence  
 79 (A1 and A3), urban influence (B2), and Canadian wildfire influence (C2 and C3).



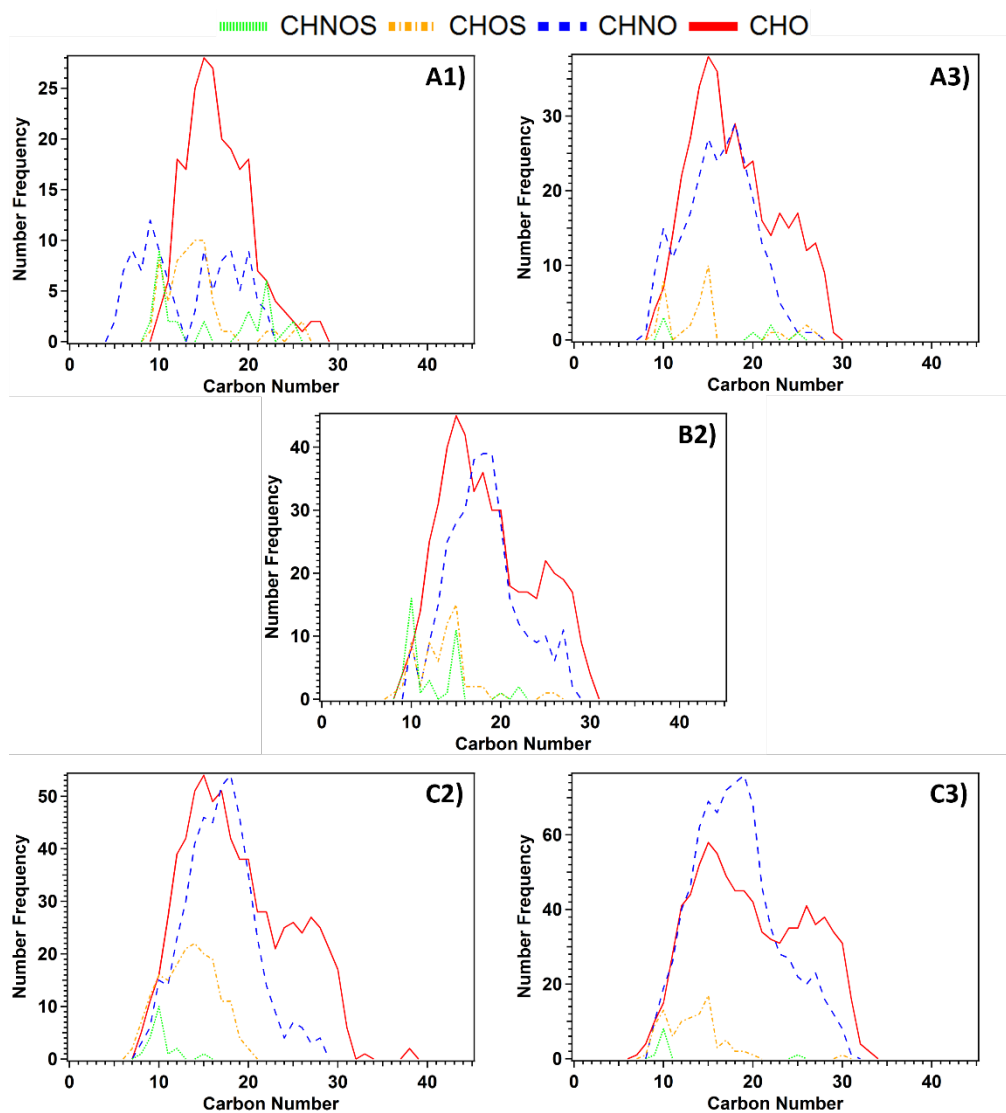

**Fig. S3.** Carbon number frequency distribution of organic compounds identified in cloud water collected during biogenic (A1 and A3), urban (B2), and wildfire (C2 and C3) influences.

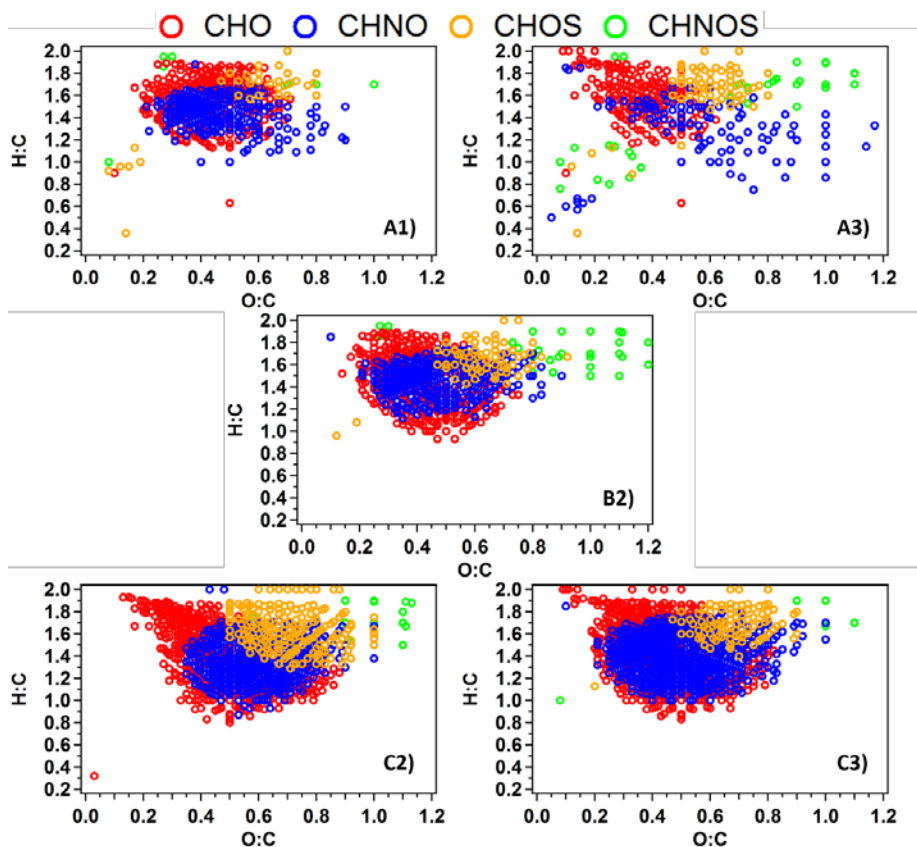

**Fig. S4.** Van Krevelen diagrams for the identified negative ions for the cloud water samples collected on (A1) 08/16/2014 18:00, (A3) 08/17/2014 18:00, (B2) 09/02/2014 18:00, (C2) 08/05/2014 06:00, and (C3) 08/06/2014 18:00

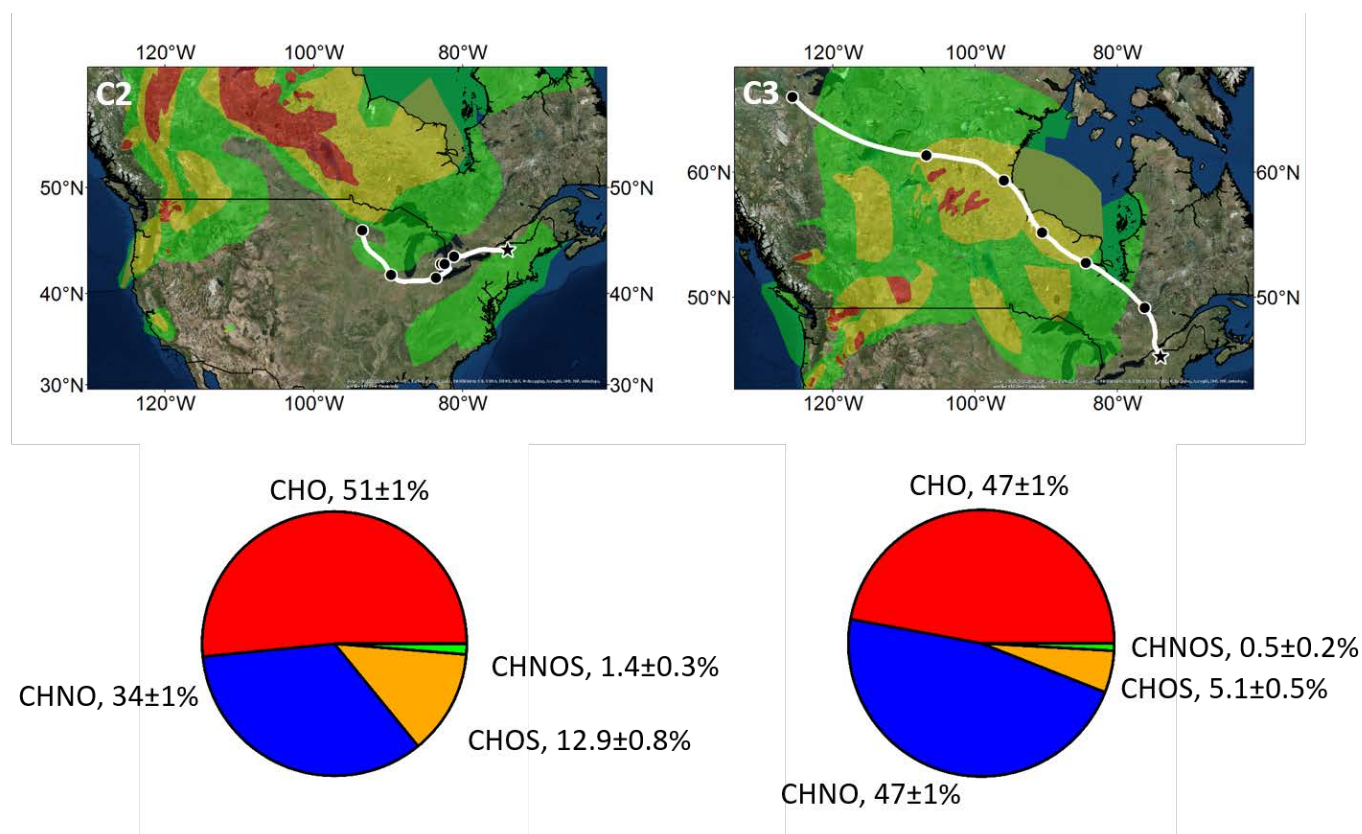

88 **Fig. S5.** NOAA HYSPLIT 144 h (6 day) backward air mass trajectories (white lines, with 6 h  
 89 resolution shown as black dots) and corresponding changes in cloud water molecular  
 90 composition, shown as compound type number percentages during the wildfire event  
 91 (samples C2 and C3). Green, yellow, and red shading on the maps represent low, moderate,  
 92 and high amounts of smoke, respectively, as defined by the NOAA Hazard Mapping System  
 93 Fire and Smoke Product (<http://www.ospo.noaa.gov/Products/land/hms.html>).

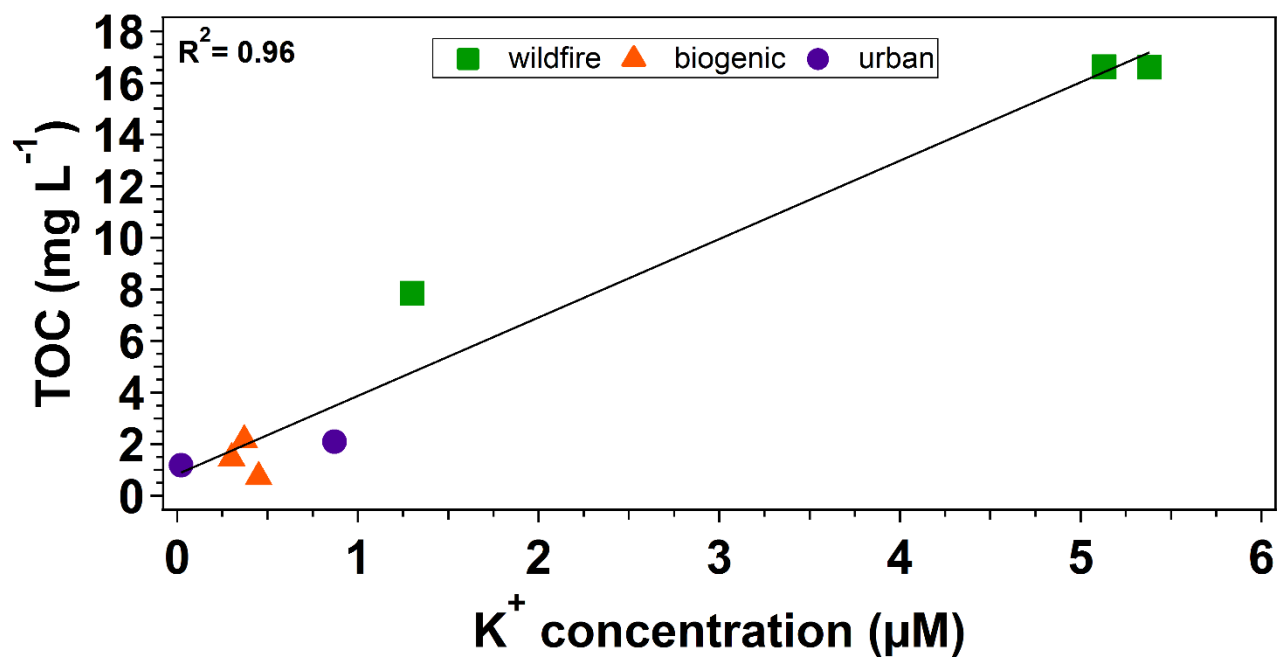

94

95 **Fig. S6.** Correlation between cloud water total organic content (TOC) and  $K^+$  concentration  
 96 for each sample, categorized by air mass source influence.
